# Supplementary material for: A rapid, site-selective and efficient route to the dual modification of DARPins
Source: Royal Society of Chemistry journal article supplement (doi:10.1039/c4cc00053f), 2014-01-01
Supplement: c4cc00053f1.pdf [file c4cc00053f1.pdf]

## A rapid, site-selective and efficient route to the dual modification of DARPin

Paul Moody,<sup>a,b</sup> Vijay Chudasama,<sup>a</sup> Ramiz I. Nathani,<sup>a</sup> Antoine Maruani,<sup>a</sup> Stephen Martin,<sup>b</sup> Justin Molloy,<sup>b</sup> Mark E. B. Smith<sup>a</sup> and Stephen Caddick<sup>\*a</sup>

<sup>a</sup> *Department of Chemistry, University College London, 20 Gordon Street, London, WC1H 0AJ, UK;* <sup>b</sup> *MRC National Institute for Medical Research, The Ridgeway, Mill Hill, London, NW7 1AA, UK.*

Tel: +44 (0)20 3108 5071; Fax: +44 (0)20 7679 7463; E-mail: [vpenterprise@ucl.ac.uk](mailto:vpenterprise@ucl.ac.uk)

### Mutation and expression of DARPin proteins

HERDARPin(WT), HER2DARPin(Cmut, L135C) and Mut4DARPin(N69C, D72C) DARPin genes were purchased from Genscript in the vector pUC57, flanked by the upstream and downstream T7 control sequences used in pET21. Sequences of purchased genes are provided in Supplementary Data 1. The primers used are provided in Supplementary Table 1, and all mutations were confirmed by DNA sequencing.

DARPins were expressed directly from pUC57 plasmids in LysY/lacIq cells (purchased from NEB). Cells were lysed by sonication, and proteins were purified by nickel affinity chromatography in the presence of 14 mM 2-mercaptoethanol. Proteins were buffer exchanged into PBS with 1 mM EDTA by repeated ultrafiltration, and aliquots were stored at -80 °C.

### Solvent accessibility calculations

Solvent accessibilities of sidechains in HER2DARPin were calculated by DSSP, using the default parameters. Calculations were performed on the A chain of PDB file 2JAB.

### Reactions with 2-Bromo-*N*-(2-methoxy-ethyl)-acetamide (BrAcEGMe)

2-Bromo-*N*-(2-methoxy-ethyl)-acetamide (BrAcEGMe) (Mw 196 Da) was purchased from Vitas M Labs. A stock solution of 10 mM BrAcEGMe was prepared in DMF, and stored at -80 °C. Proteins were reduced by incubation with 1 mM DTT in phosphate buffered saline (PBS) pH 7.4 with 1 mM EDTA for 1 h on 4 °C, followed by removal of excess DTT by ultrafiltration. 3 mg/mL of reduced protein (200 μM) was reacted with 1 mM BrAcEGMe in PBS (pH 7.4), with 10% DMF and 1 mM EDTA. Reactions

were performed with a 50  $\mu$ L total volume in 250  $\mu$ L PCR tubes on 4 °C for 1 h and analysed by LC-MS.

### **Reactions with *N*-methyl maleimide (NMM)**

*N*-Methyl maleimide (NMM) (Mw 111.1 Da) was purchased from Sigma Aldrich. A stock solution of 10 mM NMM was prepared in DMF, and stored at -80 °C. Proteins were reduced by incubation with 1 mM DTT in PBS (pH 7.4) with 1 mM EDTA for 1 h on 4 °C, followed by removal of excess DTT by ultrafiltration. 3 mg/mL of reduced protein (200  $\mu$ M) was reacted with 1 mM NMM in PBS buffer pH 7.4, with 10% DMF and 1 mM EDTA. Reactions were performed with a 50  $\mu$ L total volume in 250  $\mu$ L PCR tubes on 4 °C for 1 h and analysed by LC-MS.

### **Reaction with Tetramethylrhodamine-5-(and-6) C2 maleimide (TMRM)**

Tetramethylrhodamine-5-(and -6-) C2 maleimide (TMRM) (Mw 552.6 Da) was purchased from Anaspec. A stock solution of 10 mM TMRM was prepared in DMF, and stored at -80 °C. Proteins were reduced by incubation with 1 mM DTT in PBS (pH 7.4) with 1 mM EDTA for 1 h on 4 °C, followed by removal of excess DTT by ultrafiltration. 3 mg/mL protein (200  $\mu$ M) was reacted with 1 mM TMRM in PBS buffer pH 7.4, with 10% DMF and 1 mM EDTA. Reactions were performed with a 50  $\mu$ L total volume in 250  $\mu$ L PCR tubes on 4 °C for 1 h and the reaction quenched by addition of 10 mM 2-mercaptoethanol. Excess TMRM was removed by ultrafiltration, followed by size-exclusion chromatography, using a HiPrep 26/60 sephacryl S-100 column in PBS (pH 7.4). The product was analysed by LC-MS.

### **Protein Mass Spectrometry**

LC-MS was performed on protein samples using a Thermo Scientific uPLC connected to MSQ Plus Single Quad Detector (SQD). Column: Hypersil Gold C4, 1.9  $\mu$ m, 2.1 x 50 mm. Wavelength: 254 nm. Mobile Phase: 99:1 Water (0.1% formic acid): MeCN (0.1% formic acid) to 1:9 Water (0.1% formic acid):MeCN (0.1% formic acid) gradient over 4 min. Flow Rate: 0.3 mL/min. MS Mode: ES+. Scan Range:  $m/z$  = 500-2000. Scan time: 1.5 s. Data obtained in continuum mode. The electrospray source of the MS was operated with a capillary voltage of 3.5 kV and a cone voltage of 50 V. Nitrogen was used as the nebulizer and desolvation gas at a total flow of 600 L/h. Ion series were generated by integration of the total ion chromatogram (TIC) over the major TIC peak. Total mass spectra for protein samples were reconstructed from the ion series using the pre-installed ProMass software using default settings for large proteins in  $m/z$  range 1100-2000. The  $m/z$  range 500-1100 was not used for deconvolution as cation adducts were observed in this range.

## **Circular Dichroism and Thermal Unfolding**

HER2 DARPin (36TMRM, 105BrAcEGMe) was generated by reaction with BrAcEGMe followed by reaction with TMRM, as described above. HER2DARPin(WT) and HER2DARPin(36NMM, 105NMM) were generated by reaction of HER2DARPin(WT) and DARPin(N36C, D105C) respectively with NMM, as described above. Excess NMM was removed by repeated ultrafiltration into PBS.

Circular dichroism (CD) spectra were recorded in 1 mm fused silica cuvettes using a Jasco J-715 spectrophotometer at room temperature in PBS, with 0.15 mg/ml of each construct. Thermal unfolding curves were obtained by monitoring the CD signal at 211 nm using 2-mm pathlength cuvettes and a heating rate of 1°/min. Spectra were normalised using a constant scaling factor.

## Supplementary Data 1. Sequences of purchased genes

### HER2DARPin(WT)

TAATACGACTCACTATAGGGGAATTGTGAGCGGATAACAATTCCCCTCTAGAAATAATTTTG  
TTTAACTTTAAGAAGGAGATATACAT  
ATGCGCGGTAGCCACCACCATCACCACCACCACGGTAGCGACCTGGGCAAAAACTGCTGGAAGC  
GGCACGTGCGGGCCAAGACGACGAAGTGCGTATTCTGATGGCGAACGGCGCCGATGTTAATG  
CGAAAGACGAATATGGTCTGACCCCGCTGTACCTGGCAACGGCTCATGGCCACCTGGAAATT  
GTGGAAGTTCTGCTGAAAAACGGCGCCGATGTCAATGCAGTGGACGCTATCGGTTTTACCCC  
GCTGCATCTGGCGGCCTTCATTGGTCACCTGGAAATCGCAGAAGTTCTGCTGAAACATGGCG  
CGGATGTCAACGCCCAGGACAAATTTGGTAAAACGGCTTTCGACATCTCCATTGGTAACGGC  
AACGAAGACCTGGCTGAAATCCTGCAGAACTGAACTGA  
TGCTGCCACCGCTGAGCAATAACTAGCATAACCCCTTGGGGCCTCTAAACGGGTCTTGAGGG  
GTTTTTTG

### HER2DARPin(Cmut, L135C)

TAATACGACTCACTATAGGGGAATTGTGAGCGGATAACAATTCCCCTCTAGAAATAATTTTG  
TTTAACTTTAAGAAGGAGATATACAT  
ATGCGCGGTAGCCACCACCATCATCATCACGGTAGCGACCTGGGCAAAAACTGCTGGAAGC  
GGCACGTGCGGGCCAAGACGACGAAGTGCGTATTCTGATGGCGAACGGCGCCGATGTTAATG  
CGAAAGACGAATATGGTCTGACCCCGCTGTACCTGGCAACGGCTCATGGCCACCTGGAAATT  
GTGGAAGTTCTGCTGAAAAACGGCGCAGATGTCAATGCAGTGGACGCTATCGGTTTTACCCC  
GCTGCATCTGGCGGCCTTCATTGGTCACCTGGAAATCGCGGAAGTTCTGCTGAAACATGGCG  
CGGATGTCAACGCCCAGGACAAATTTGGTAAAACGCCGTTTCGATCTGGCTATTCGTGAAGGT  
CATGAAGACATCGCTGAAGTCCTGCAGAAATGTGCGTAA  
TGCTGCCACCGCTGAGCAATAACTAGCATAACCCCTTGGGGCCTCTAAACGGGTCTTGAGGG  
GTTTTTTG

### Mut4DARPin(N69C, D72C)

TAATACGACTCACTATAGGGGAATTGTGAGCGGATAACAATTCCCCTCTAGAAATAATTTTG  
TTTAACTTTAAGAAGGAGATATACAT  
ATGCGCGGTAGTCATCATCATCATCATCATGGCTCGGATCTGGGCAAGAACTGCTGGAAGC  
GGCCCGTGCTGGTCAGGACGACGAAGTCCGTATTCTGATGGCAAACGGCGCTGATGTGAATG  
CAAAAGATAAGGACGGTTATACCCCGCTGCATCTGGCAGCACGTGAAGGTCACCTGGAAATC  
GTGGAAGTTCTGCTGAAATGCGGCGCGTGTGTTAACGCCCAGGACAAATTTGGCAAGACGGC  
CTTCGACATCTCTATCGACAATGGTAATGAAGACCTGGCTGAAATCCTGCAAAGGCTGCGT  
AA  
TGCTGCCACCGCTGAGCAATAACTAGCATAACCCCTTGGGGCCTCTAAACGGGTCTTGAGGG  
GTTTTTTG

**Supplementary Table 1. Primers used for mutagenesis**

| Mutation      | Forwards primer                                  | Reverse primer                                   |
|---------------|--------------------------------------------------|--------------------------------------------------|
| N36C          | GGCGTGCGGGGCGGATGTTAAT<br>GCGAAAGAC              | CATCGGCCCCGCACGCCATCAG<br>AATACGC                |
| Nmut,<br>N36C | CGTGAAGCTGCTGAAATGCGGCG<br>CCGATGTTAATGCGAAAGACG | GCATTTTCAGCAGTTCACGCACTT<br>CGTCGTCTTGGCCCCGCACG |
| D39C          | GGCGAACGGGGCCTGTGTTAAT<br>GCGAAAGAC              | GCGTATTCTGATGGCGAACGGG<br>GCCTGTG                |
| H59C          | CTCATGGCTGTCTGGAAATTGTG<br>GAAGTTCTGC            | CAATTTCCAGACAGCCATGAGC<br>CGTTGCC                |
| L60C          | CTGCGAAATTGTGGAAGTTCTGC<br>TGAAAAACGGCG          | CAGAACTTCCACAATTTTCGCAGT<br>GGCCATGAGC           |
| E61C          | CCTGTGTATTGTGGAAGTTCTGC<br>TGAAAAACGGCG          | CAGAACTTCCACAATACACAGGT<br>GGCCATGAGC            |
| E64C          | CCTGGAAATTGTGTGTGTTCTGC<br>TGAAAAACGGCG          | CAGAACACACACAATTTCCAGGT<br>GGCCATGAGC            |
| V65C          | CCTGGAAATTGTGGAATGTCTGC<br>TGAAAAACGGCG          | CAGACATTCCACAATTTCCAGGT<br>GGCCATGAGC            |
| K68C          | GTGTAACGGCGCCGATGTCAAT<br>GCAGTGGACG             | GACATCGGCGCCGTTACACAGC<br>AGAACTTCC              |
| N69C          | GAAATGTGGCGCCGATGTCAAT<br>GCAGTGGACG             | GACATCGGCGCCACATTTTCAGC<br>AGAACTTCC             |
| G70C          | GAAAAACTGTGCCGATGTCAATG<br>CAGTGGACG             | GACATCGGCACAGTTTTTCAGCA<br>GAACTTCC              |
| D72C          | GAAAAACGGCGCCTGTGTCAAT<br>GCAGTGGACG             | GACACAGGCGCCGTTTTTCAGC<br>AGAACTTCC              |
| H102C         | CTGAAATGTGGAGCGGATGTCA<br>ACGCCCAGGAC            | GACATCCGCTCCACATTTTCAGCA<br>GAACTTCT             |
| D105C         | CTGAAACATGGAGCGTGTGTCA<br>ACGCCCAGGAC            | GACACACGCTCCATGTTTCAGCA<br>GAACTTCT              |
| L135C         | TGTAAGTATGCTGCCACCGCT<br>GAGCAATAACTAGC          | GTGGCAGCATCAGTTACATTTCT<br>GCAGGATTTTCAGCCAG     |

**Supplementary Figure 1. HER2DARPin(WT) in PBS, 1 mM EDTA.**  
**Expected mass 14596.4 Da**

**Sequence**

MRGSHHHHHHGS~~DLGKKLLEA~~RA~~QDD~~EVRI~~LMANGAD~~VNAKDEYGLTPLYLATAHGHLEI  
VEVLLKNGADVNA~~VDAIGFTPLHLAAFI~~GHLEIAEVLLKHGADVNAQDKFGKTA~~FDIS~~ING  
NEDLAEILQKLN

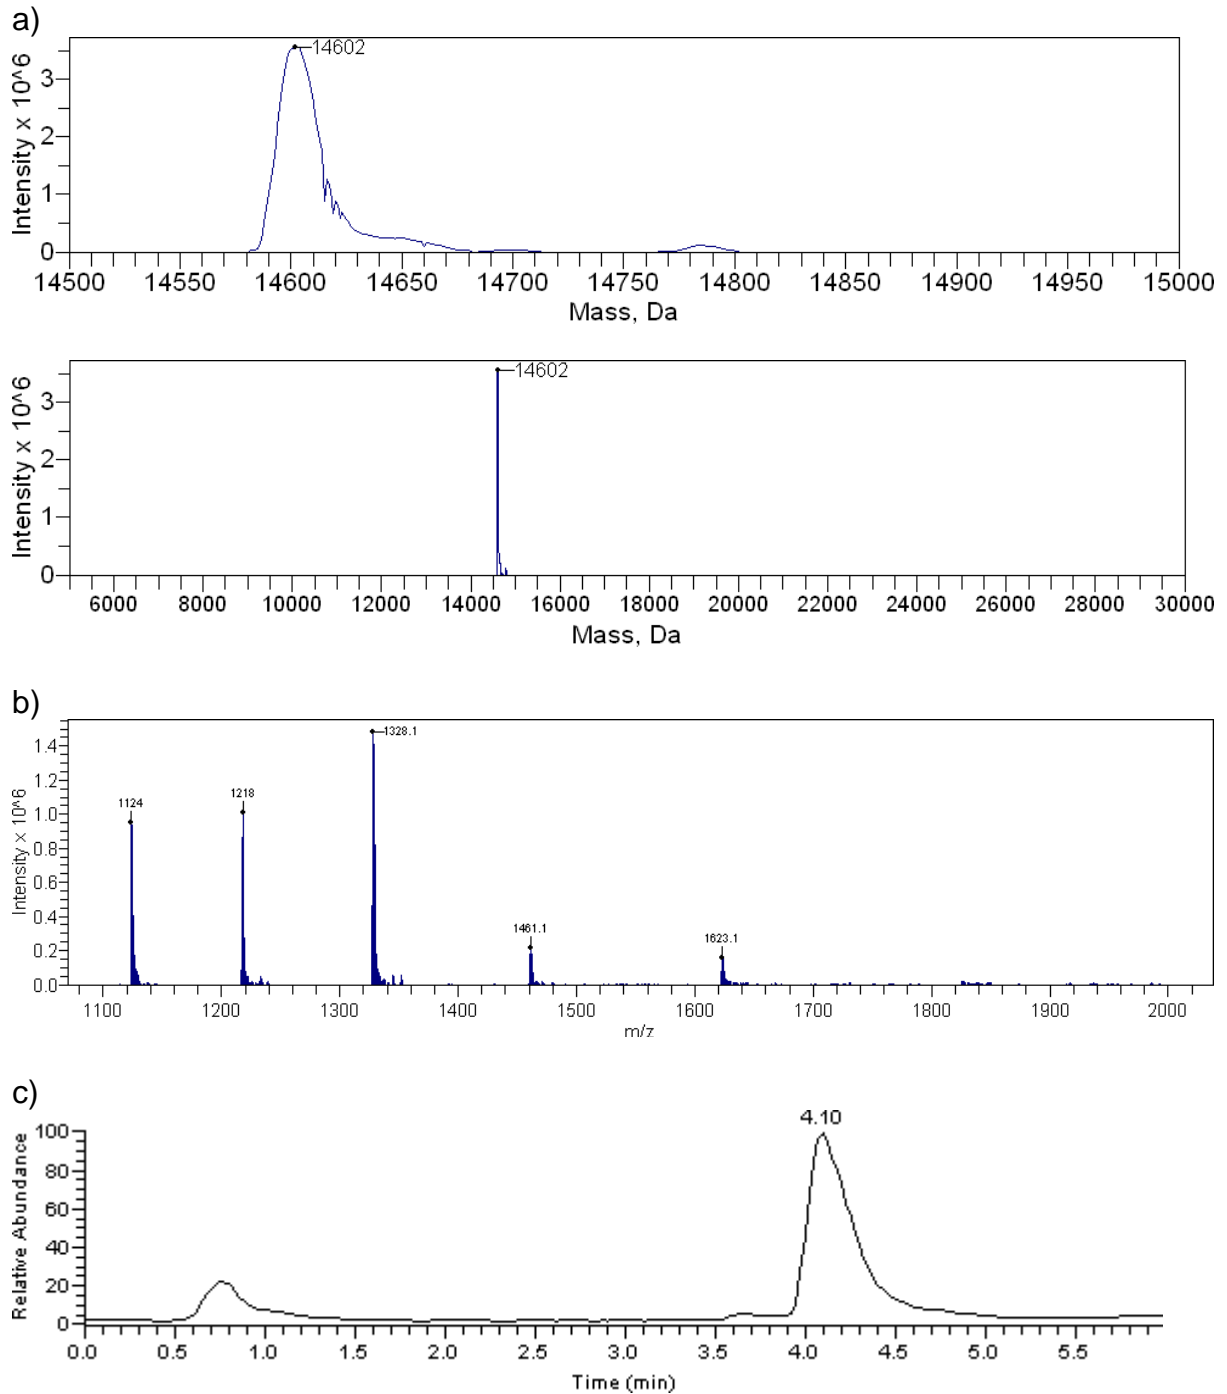

(a) deconvoluted, (b) non-deconvoluted, and (c) TIC mass spectrometry data for HER2DARPin(WT).

**Supplementary Figure 2. HER2DARPin(WT) with 1 mM BrAcEGMe, 1 mM EDTA, in PBS pH 7.4, 10% DMF, 2 h, at 4 °C.**

**Expected mass (unmodified) 14596.4 Da**

**Expected mass (modified) 14711.6 Da**

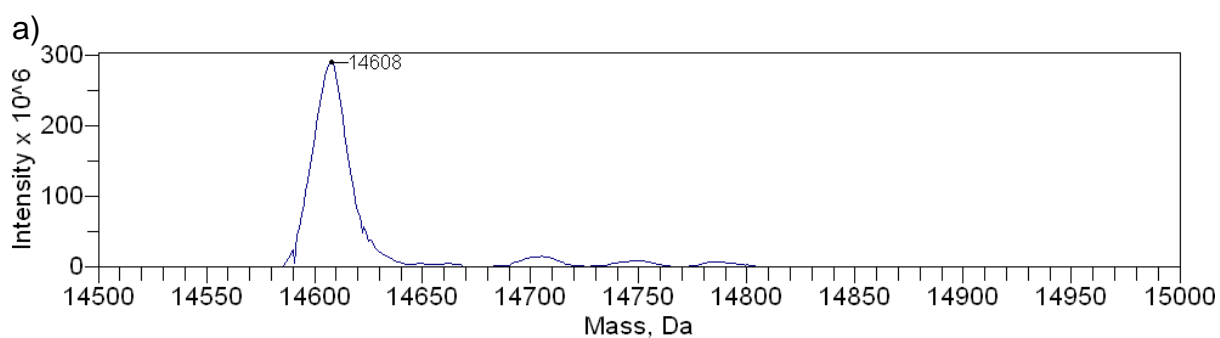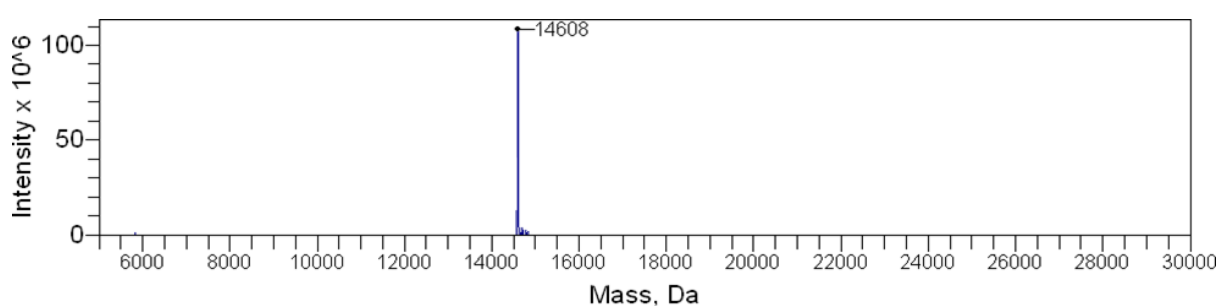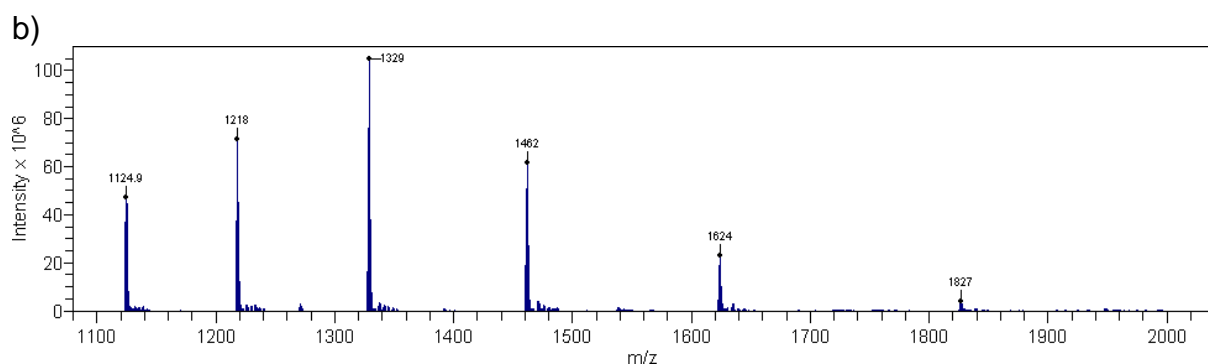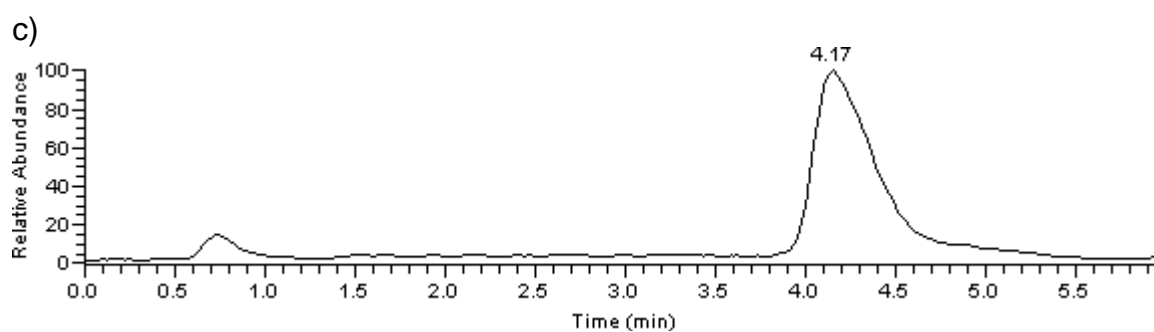

(a) deconvoluted, (b) non-deconvoluted, and (c) TIC mass spectrometry data for HER2DARPin(WT) reacted with BrAcEGMe.

**Supplementary Figure 3. HER2DARPin(WT) with 1 mM NMM, 1 mM EDTA, in PBS pH 7.4, 10% DMF, 1 h, at 4 °C.**

**Expected mass (unmodified) 14596.4 Da**

**Expected mass (modified) 14707.5 Da**

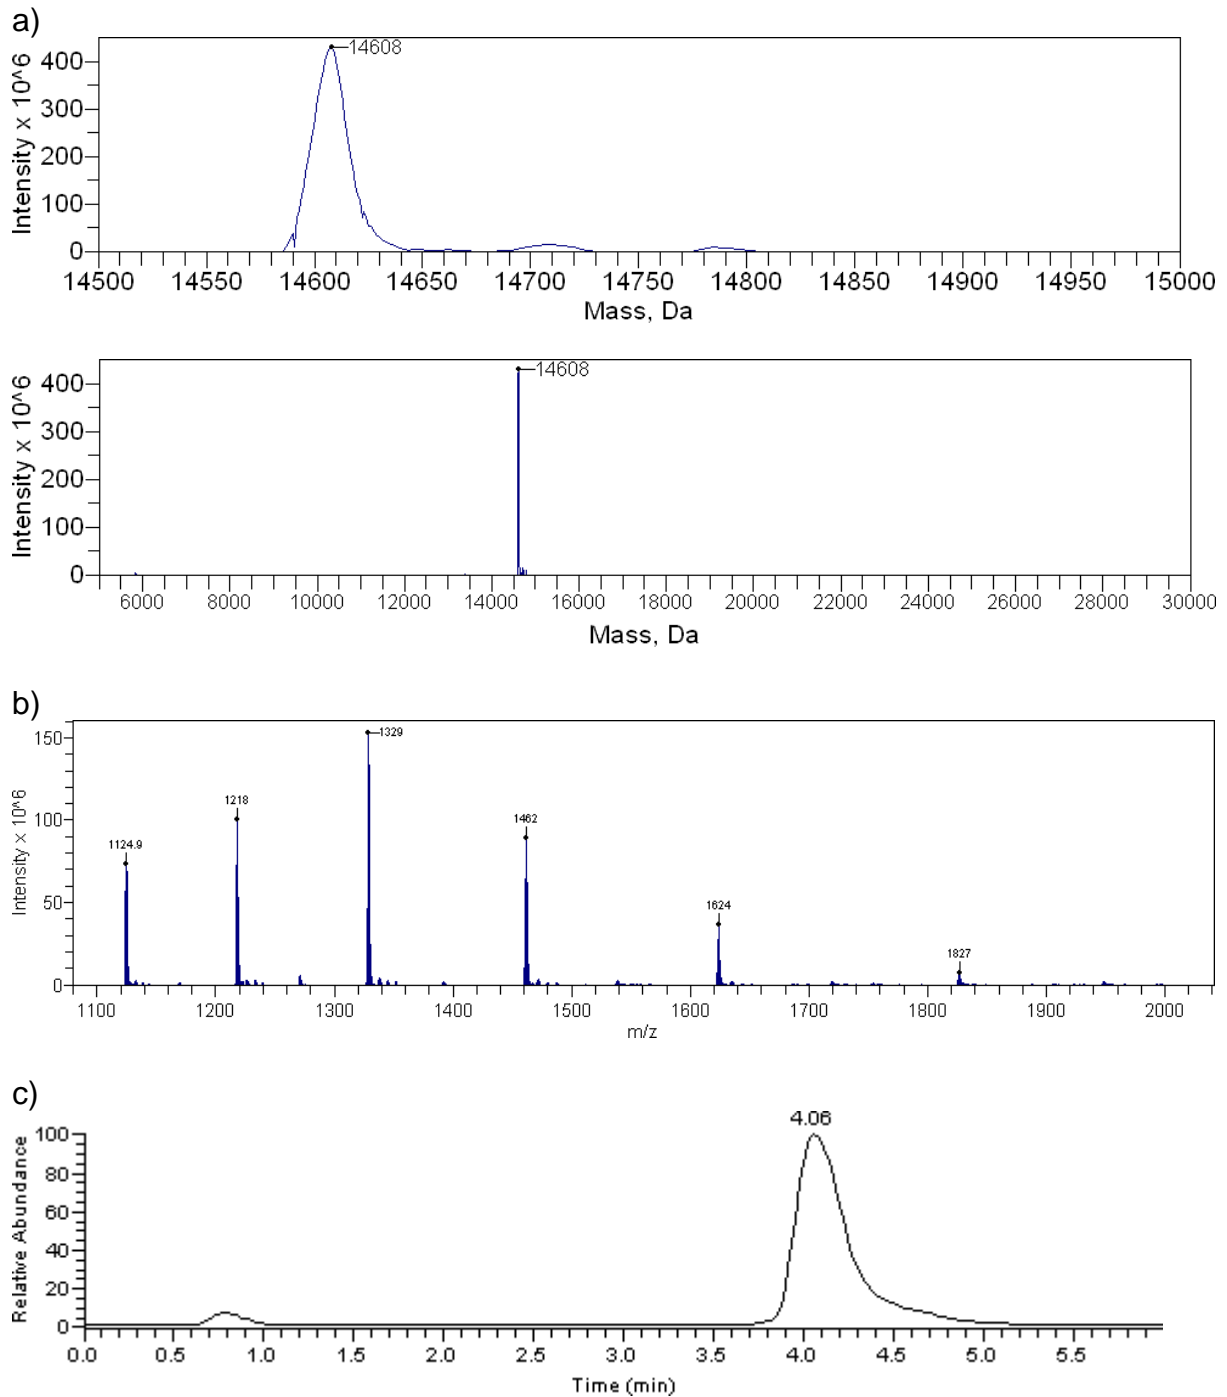

(a) deconvoluted, (b) non-deconvoluted, and (c) TIC mass spectrometry data for HER2DARPin(WT) reacted with NMM.



**Supplementary Figure 4. HER2DARPin(N36C) in PBS, 1 mM EDTA.**  
**Expected mass 14585.4 Da**

**Sequence**

MRGSHHHHHHGSDLGKKLLEAARAGQDDEVRI<sup>C</sup>LMA<sup>C</sup>GADVNAKDEYGLTPLYLATAHGHLEI  
VEVLLKNGADVNAVDAIGFTPLHLAAFIGHLEIAEVLLKHGADVNAQDKFGKTAFDISIGNG  
NEDLAEILQKLN

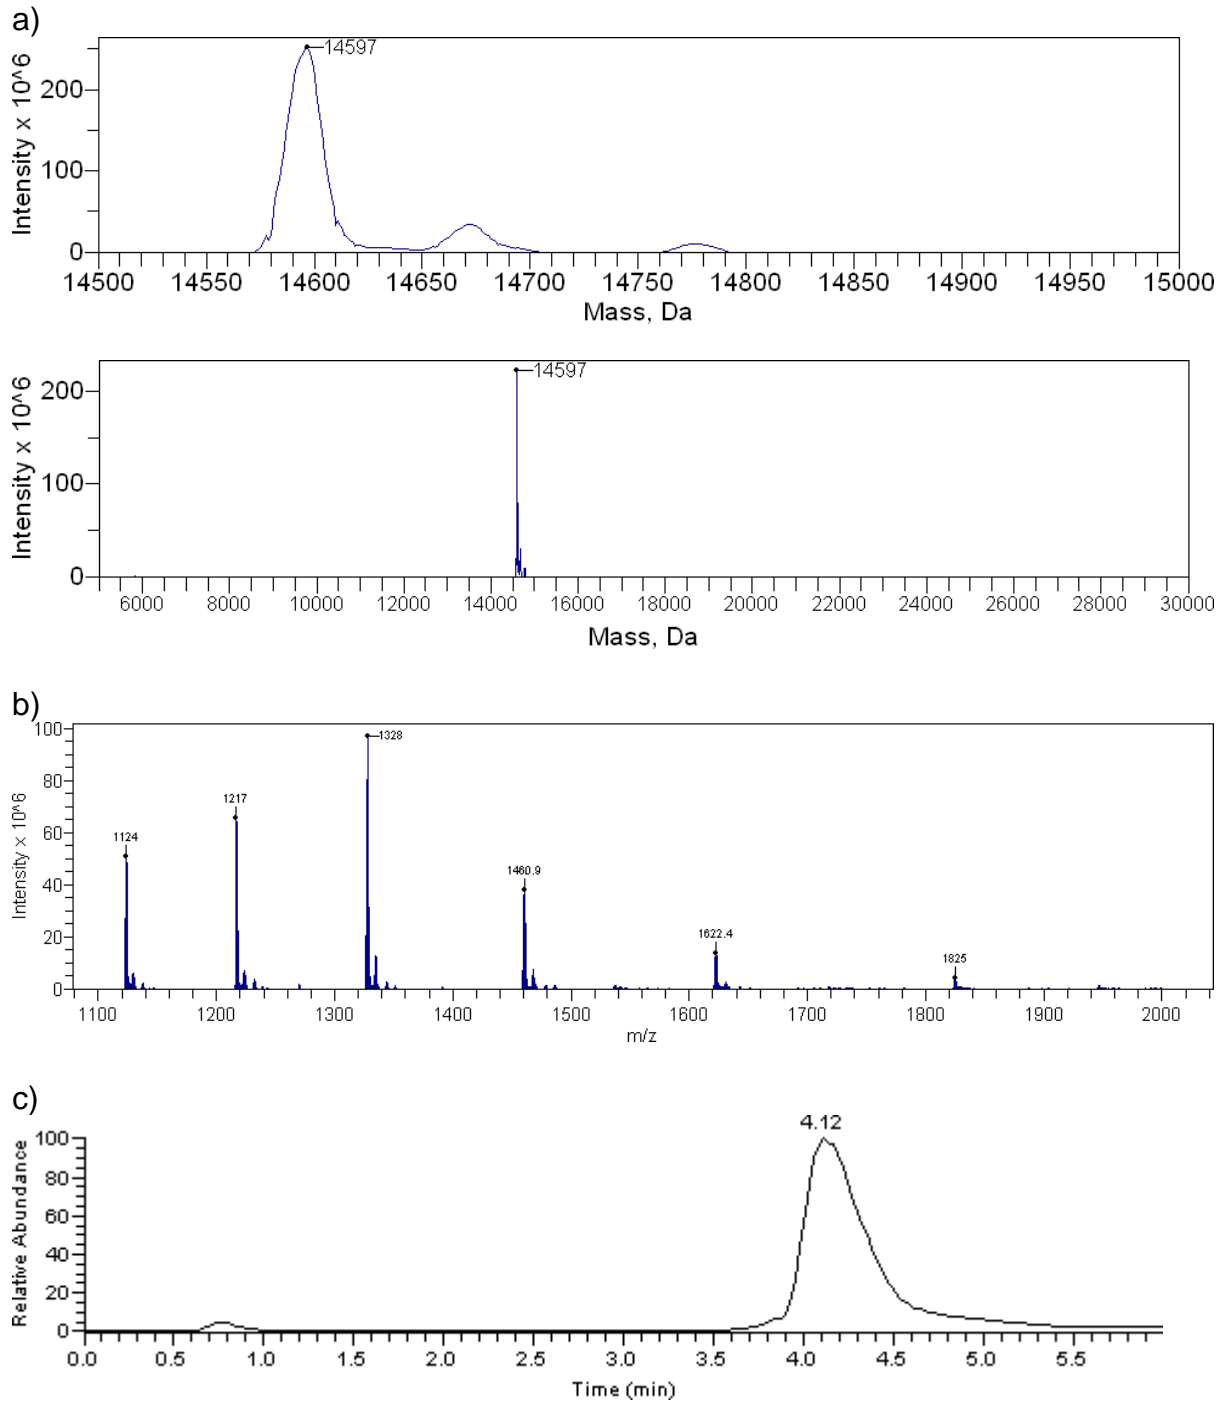

(a) deconvoluted, (b) non-deconvoluted, and (c) TIC mass spectrometry data for HER2DARPin(N36C).

**Supplementary Figure 5. HER2DARPin(N36C) with 1 mM BrAcEGMe, 1 mM EDTA, in PBS pH 7.4, 10% DMF, 2 h, at 4 °C.**

**Expected mass (unmodified) 14585.4 Da**

**Expected mass (modified) 14700.6 Da**

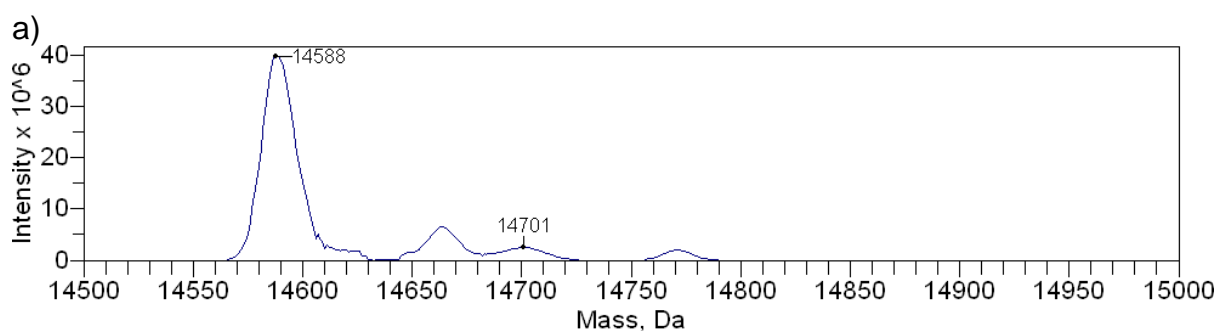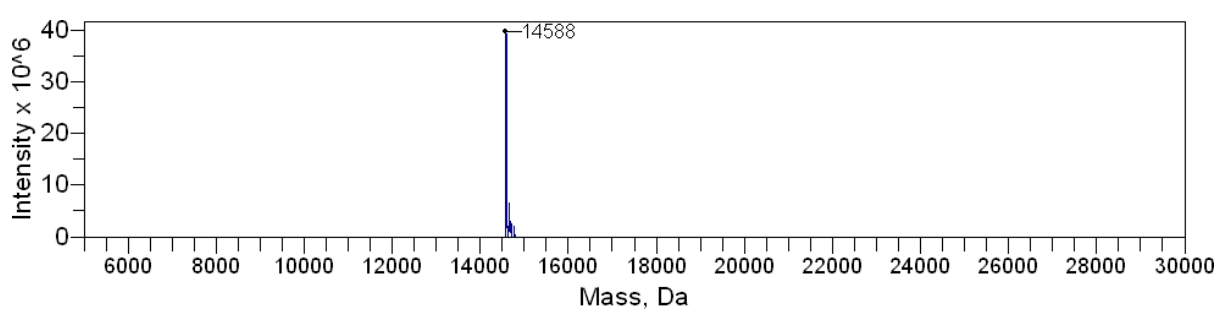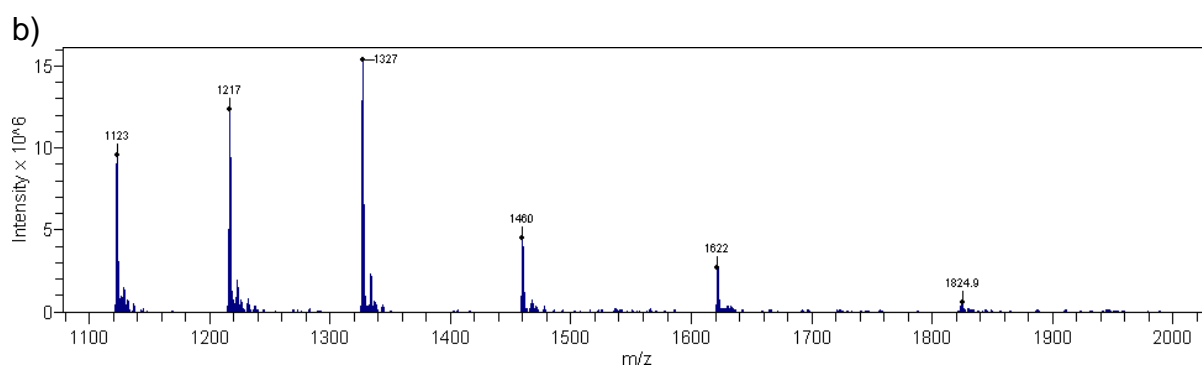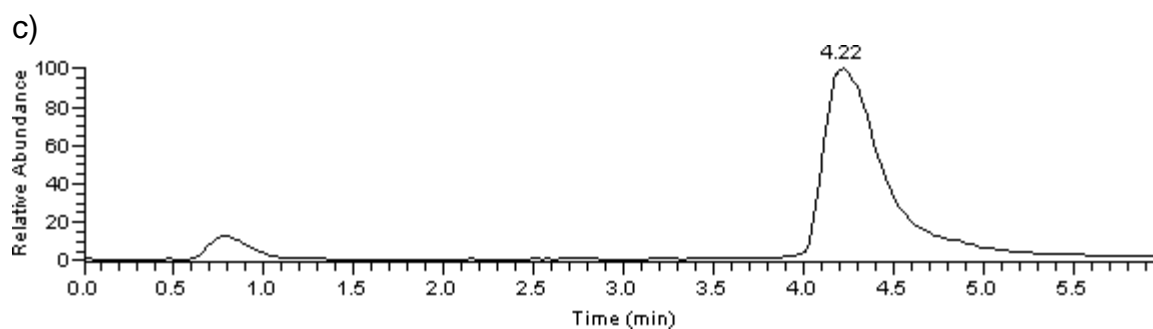

(a) deconvoluted, (b) non-deconvoluted, and (c) TIC mass spectrometry data for HER2DARPin(N36C) reacted with BrAcEGMe.

**Supplementary Figure 6. HER2DARPin(N36C) with 1 mM NMM, 1 mM EDTA, in PBS pH 7.4, 10% DMF, 1 h, at 4 °C.**

**Expected mass (unmodified) 14585.4 Da**

**Expected mass (modified) 14696.5 Da**

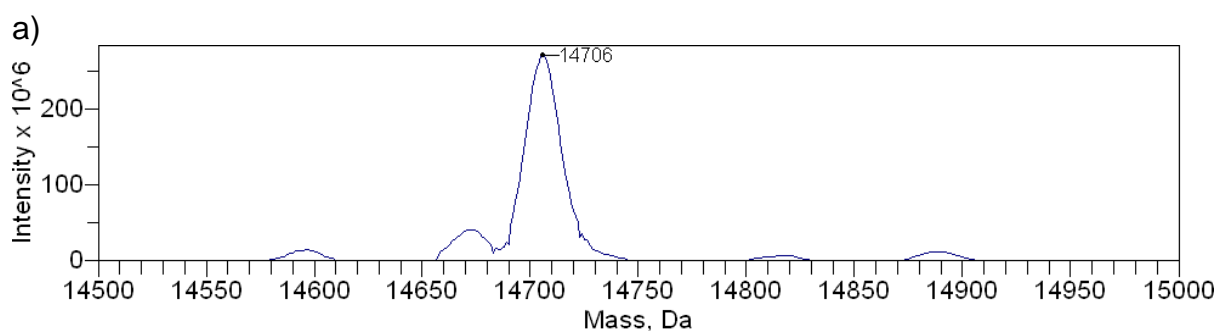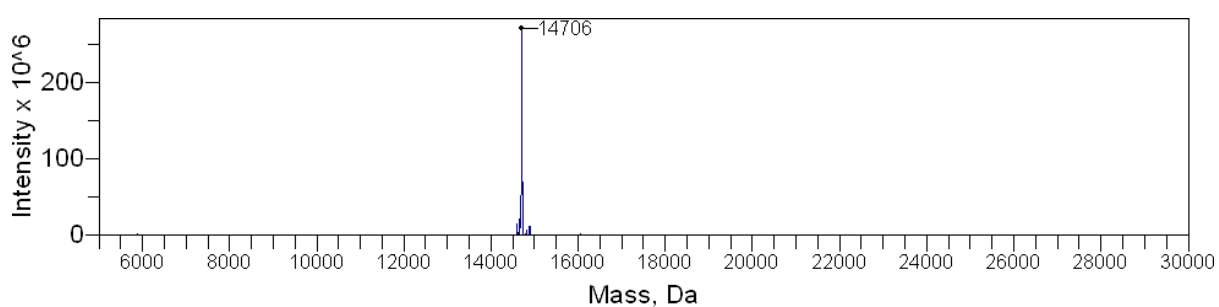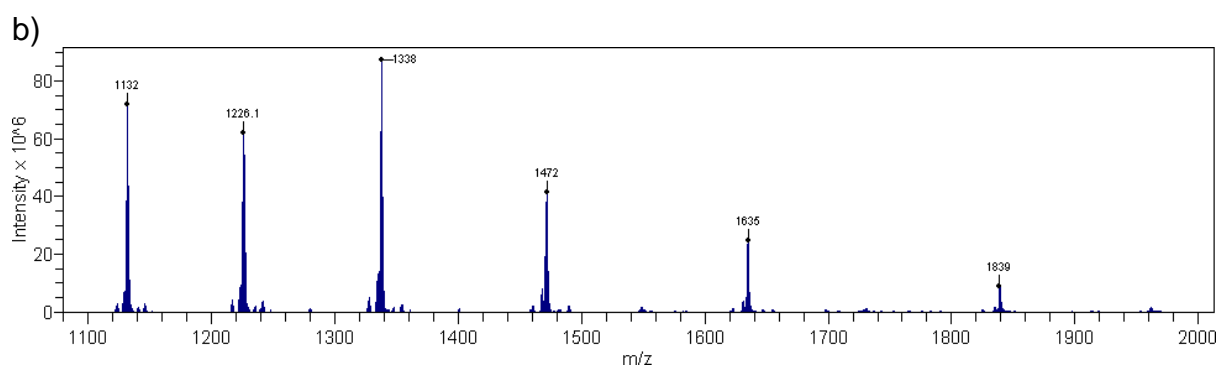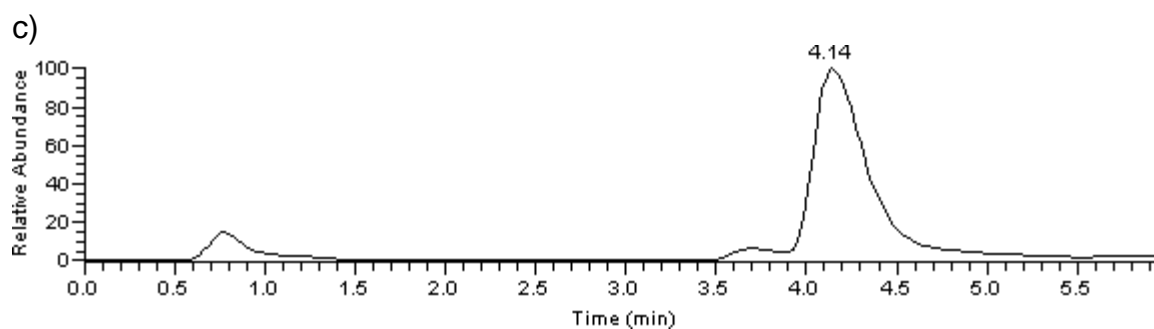

(a) deconvoluted, (b) non-deconvoluted, and (c) TIC mass spectrometry data for HER2DARPin(N36C) reacted with NMM.

**Supplementary Figure 7. HER2DARPin(Nmut, N36C) in PBS, 1 mM EDTA.  
Expected mass 14640.4 Da**

**Sequence**

MRGSHHHHHHGS~~DLGKKLL~~EAARAGQDDEVREELLKCGADVNAKDEYGLTPLYLATAHGHLEI  
VEVLLKNGADVNAVDAIGFTPLHLAAFIGHLEIAEVLLKHGADVNAQDKFGKTAFDISIGNG  
NEDLAEILQKLN

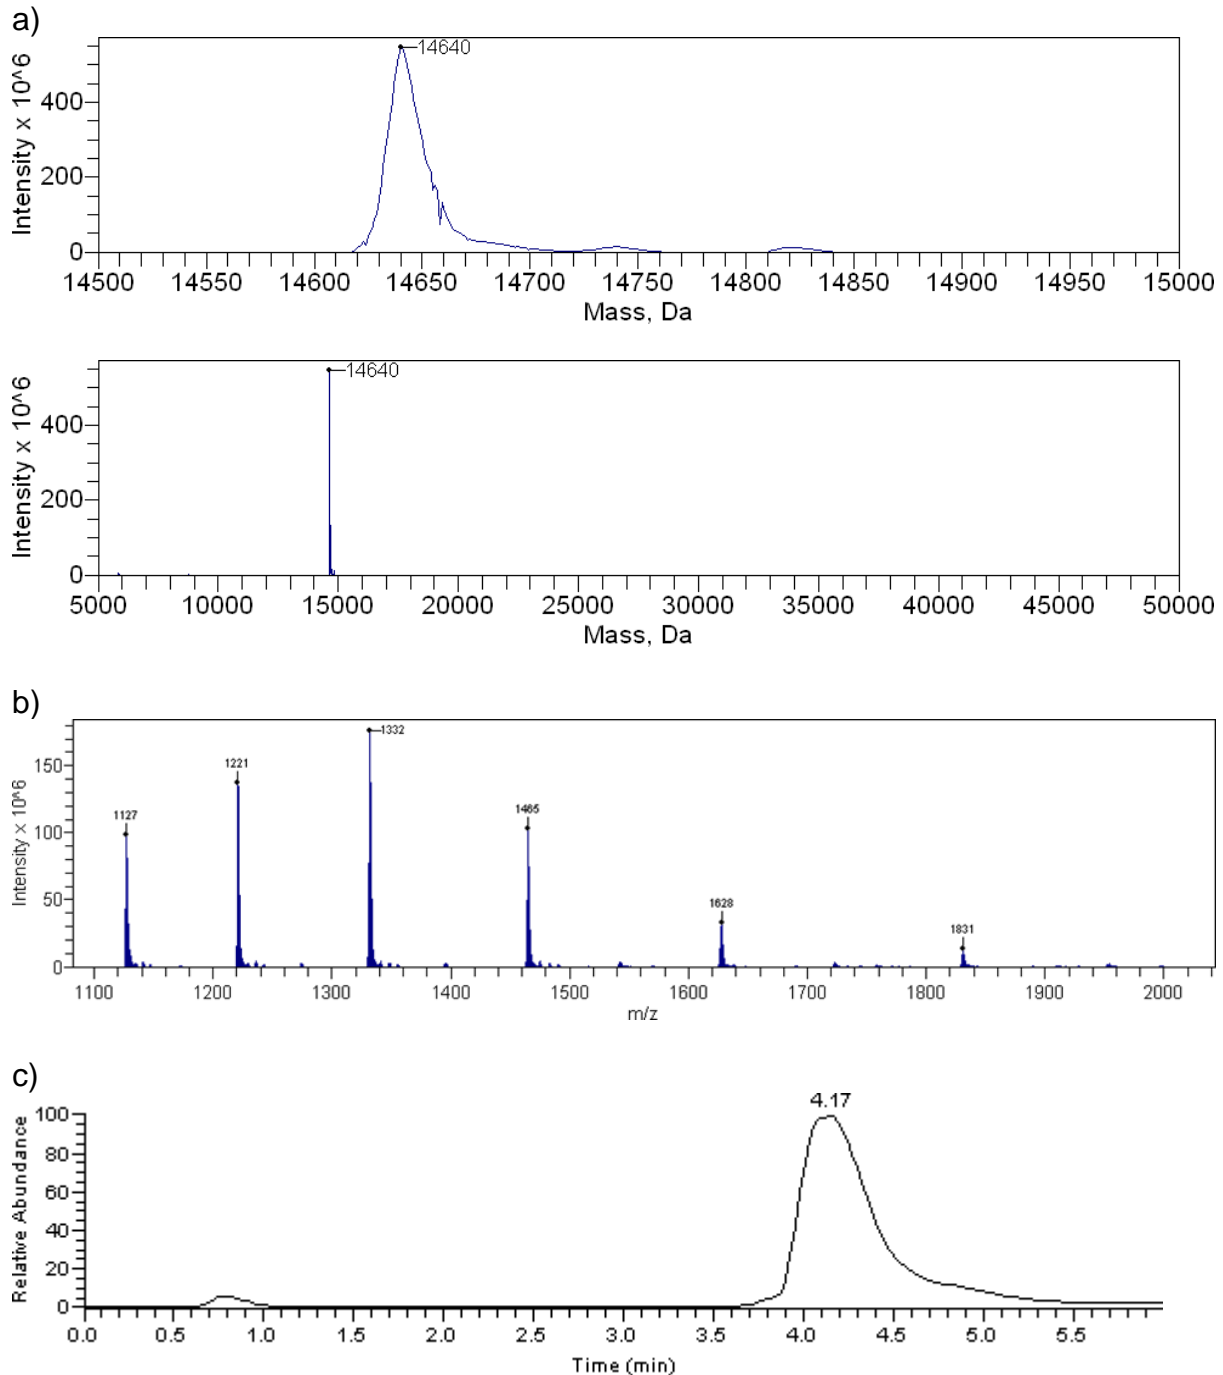

(a) deconvoluted, (b) non-deconvoluted, and (c) TIC mass spectrometry data for HER2DARPin(Nmut, N36C).

**Supplementary Figure 8. HER2DARPin(Nmut, N36C) with 1 mM BrAcEGMe, 1 mM EDTA, in PBS pH 7.4, 10% DMF, 2 h, at 4 °C.**

**Expected mass (unmodified) 14640.4 Da**

**Expected mass (modified) 14755.6 Da**

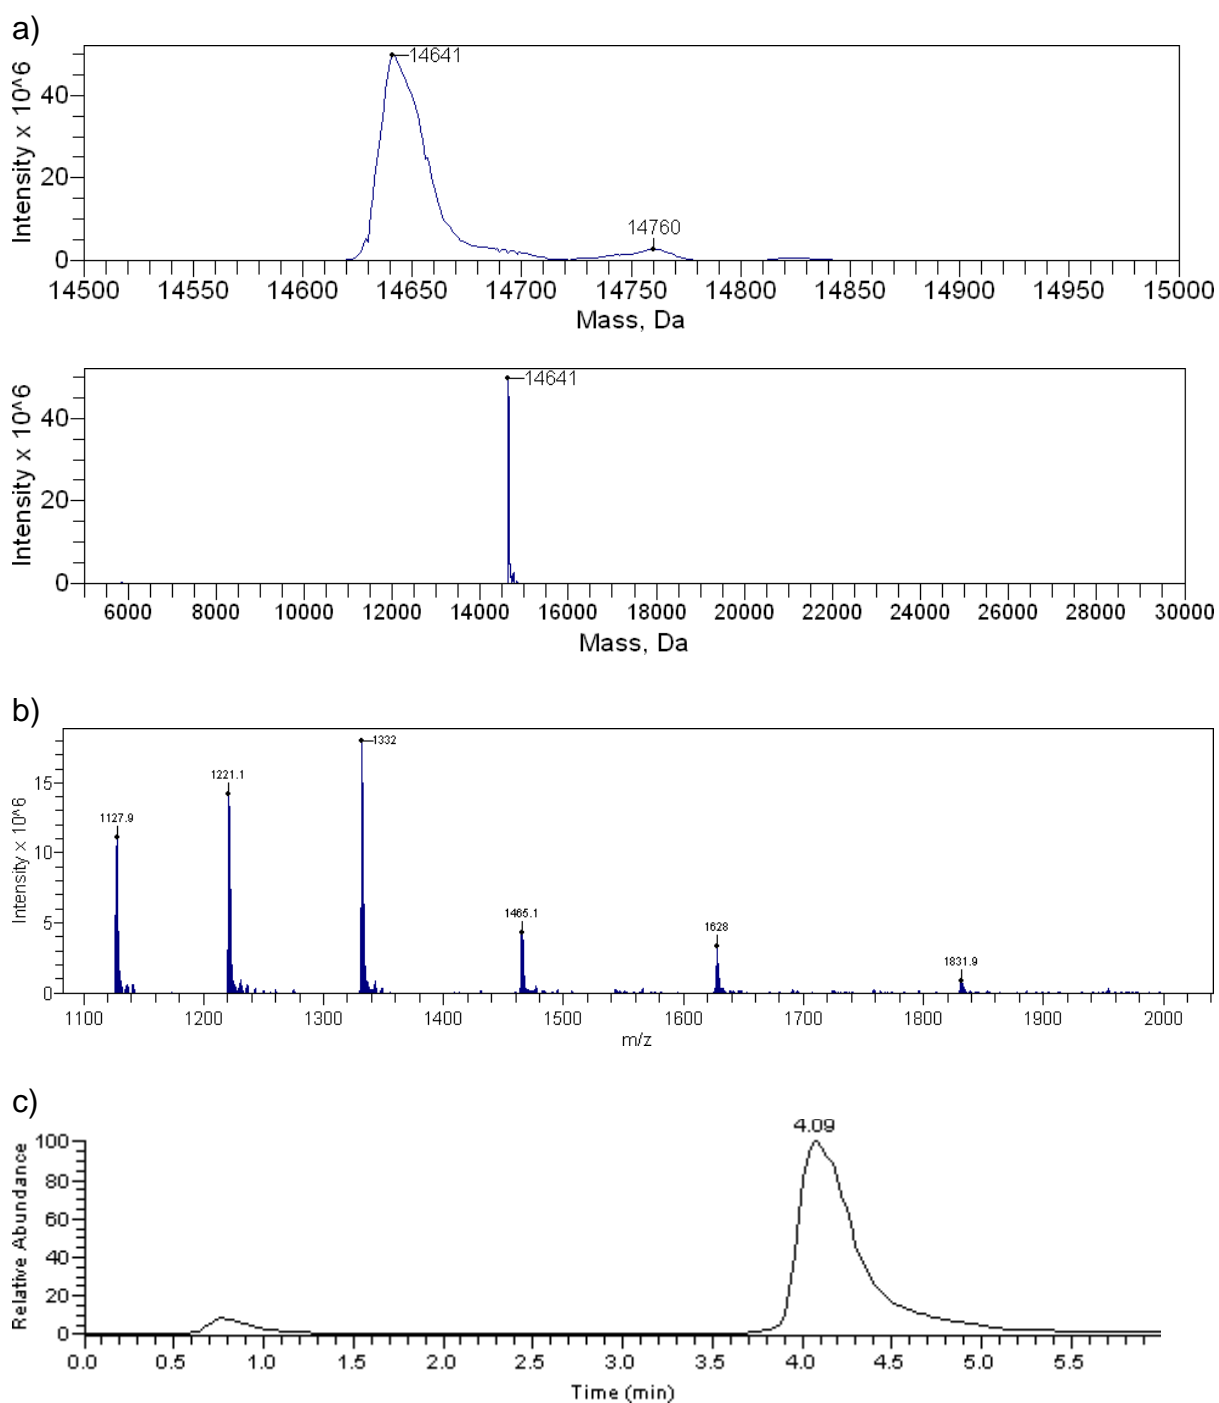

(a) deconvoluted, (b) non-deconvoluted, and (c) TIC mass spectrometry data for HER2DARPin(Nmut, N36C) reacted with BrAcEGMe.

**Supplementary Figure 9. HER2DARPin(Nmut, N36C) with 1 mM NMM, 1 mM EDTA, in PBS pH 7.4, 10% DMF, 1 h, at 4 °C.**

**Expected mass (unmodified) 14640.4 Da**

**Expected mass (modified) 14751.5 Da**

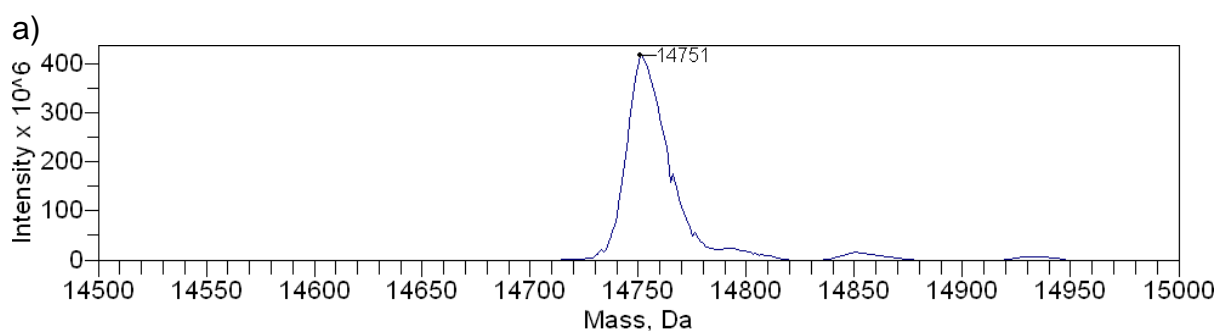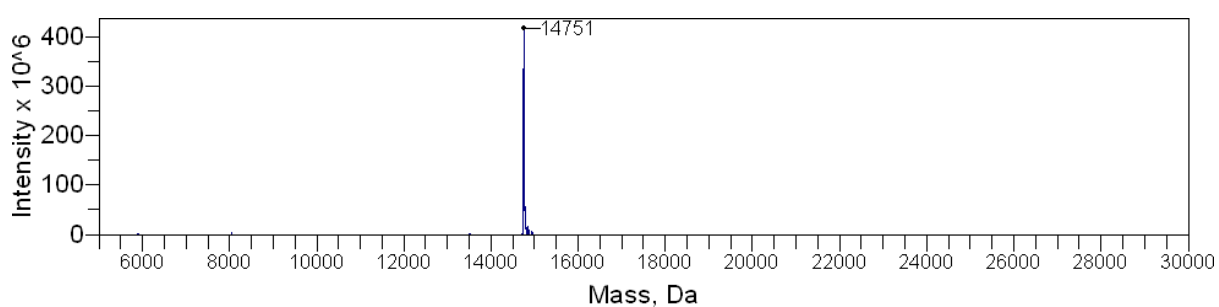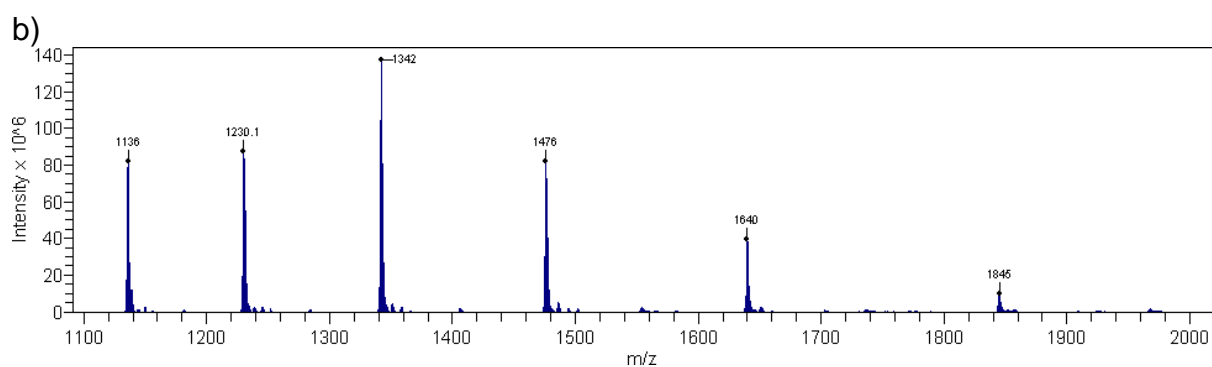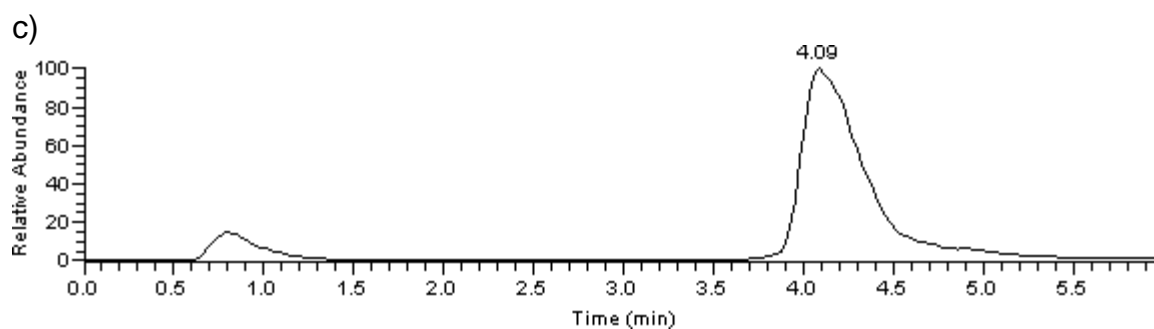

(a) deconvoluted, (b) non-deconvoluted, and (c) TIC mass spectrometry data for HER2DARPin(Nmut, N36C) reacted with NMM.

**Supplementary Figure 10. HER2DARPin(D39C) in PBS, 1 mM EDTA.**  
**Expected mass 14584.4 Da**

**Sequence**

MRGSHHHHHHGS~~DL~~GKKLLEAARAGQDDEVRI~~L~~MANGA~~C~~VNAKDEYGLTPLYLATAHGHLEI  
VEVLLKNGADVNAVDAIGFTPLHLAAFIGHLEIAEVLLKHGADVNAQDKFGKTAFDISIGNG  
NEDLAEILQKLN

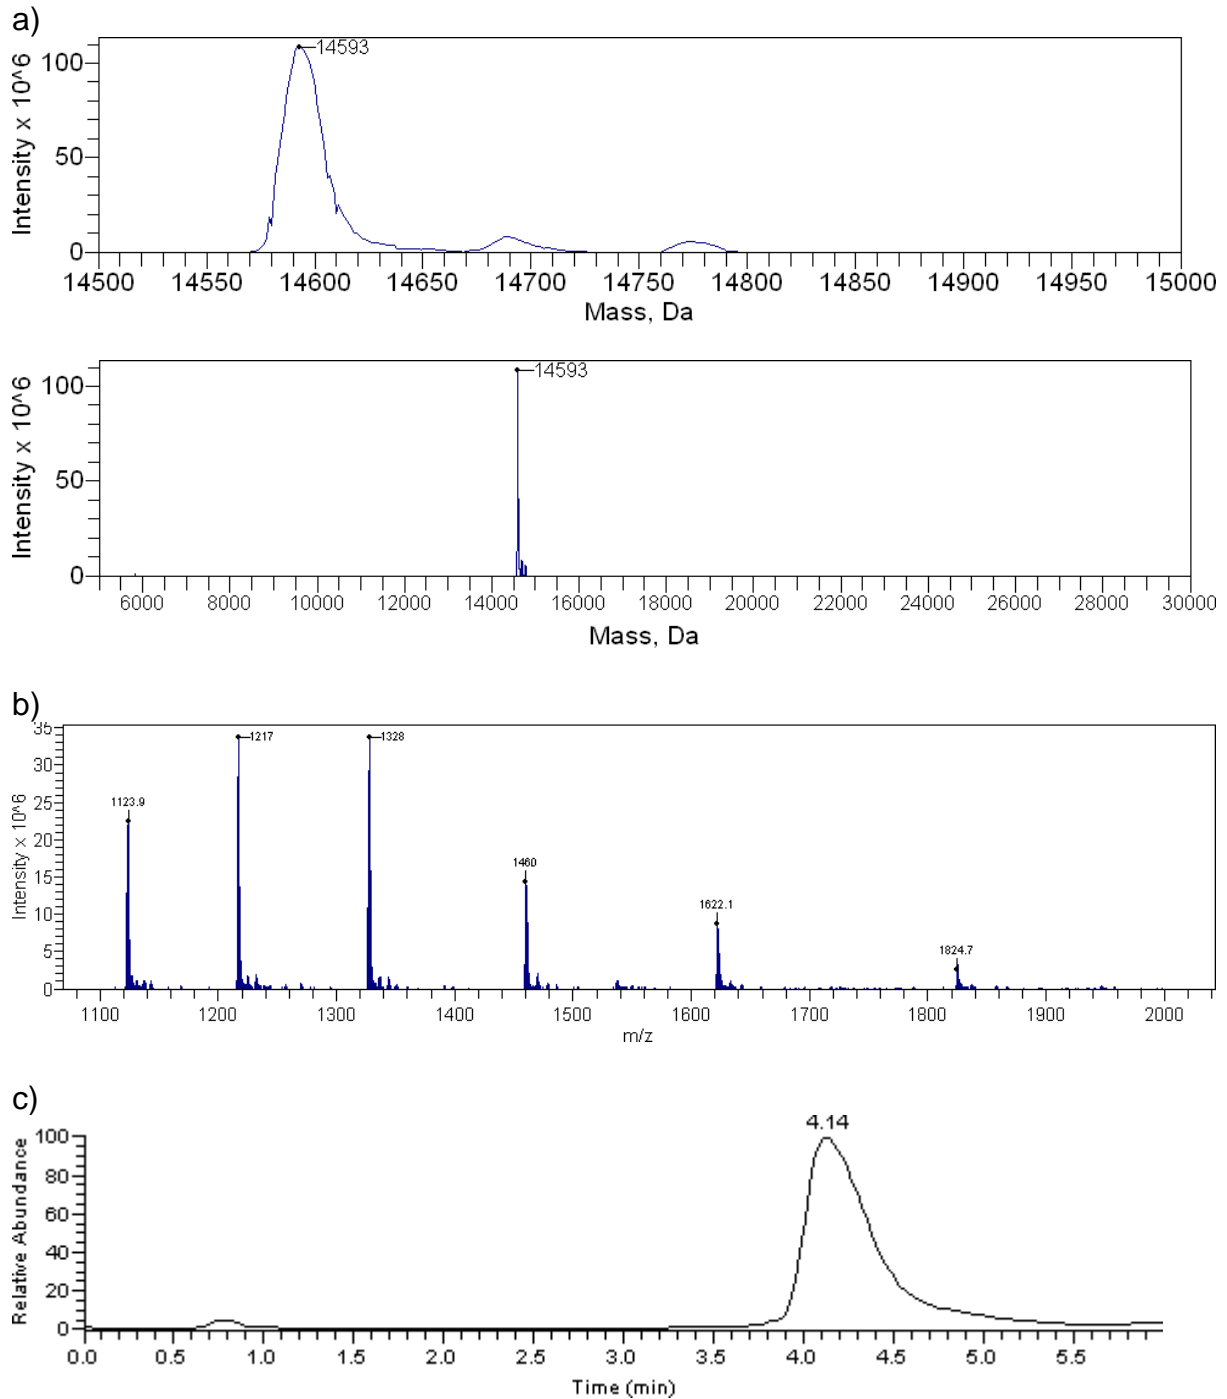

(a) deconvoluted, (b) non-deconvoluted, and (c) TIC mass spectrometry data for HER2DARPin(D39C).

**Supplementary Figure 11. HER2DARPin(D39C) with 1 mM BrAcEGMe, 1 mM EDTA, in PBS pH 7.4, 10% DMF, 2 h, at 4 °C.**  
**Expected mass (unmodified) 14584.4 Da**  
**Expected mass (modified) 14699.6 Da**

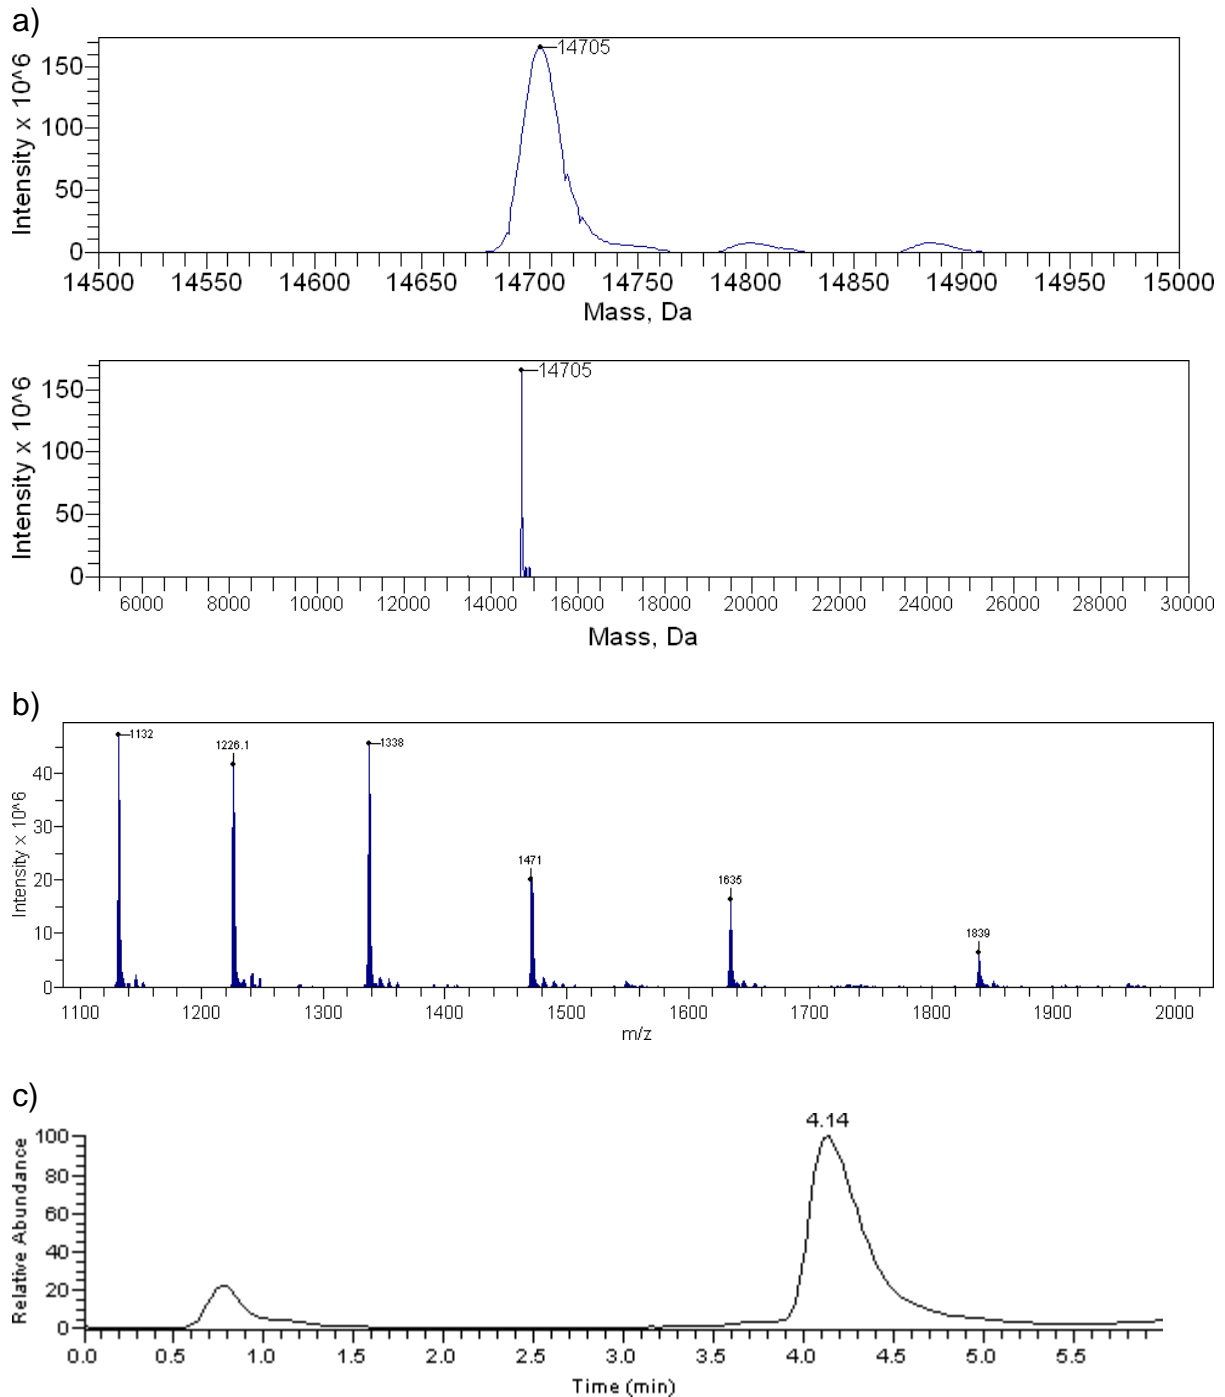

(a) deconvoluted, (b) non-deconvoluted, and (c) TIC mass spectrometry data for HER2DARPin(D39C) reacted with BrAcEGMe.



**Supplementary Figure 12. HER2DARPin(D39C) with 1 mM NMM, 1 mM EDTA, in PBS pH 7.4, 10% DMF, 1 h, at 4 °C.**

**Expected mass (unmodified) 14584.4 Da**

**Expected mass (modified) 14695.5 Da**

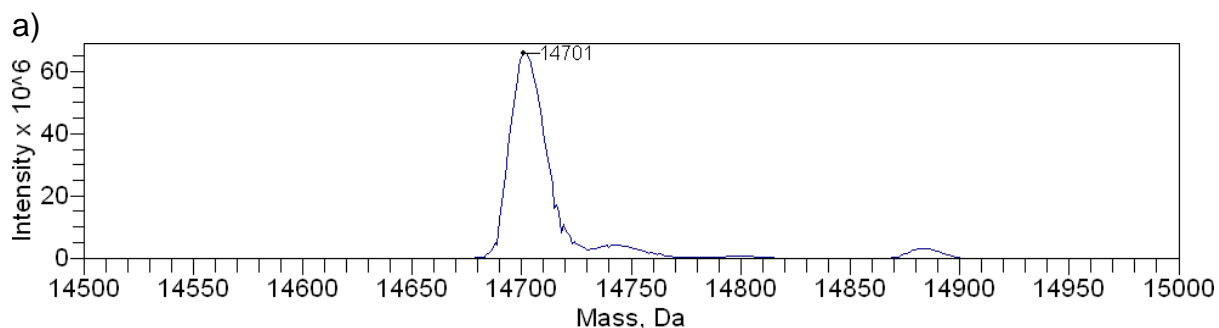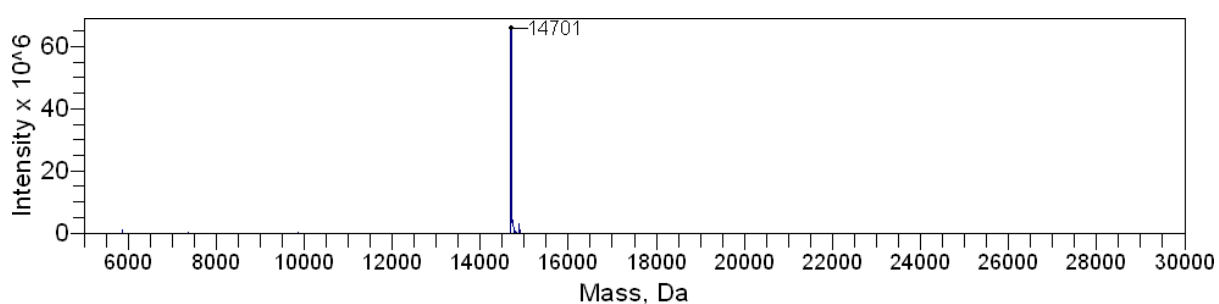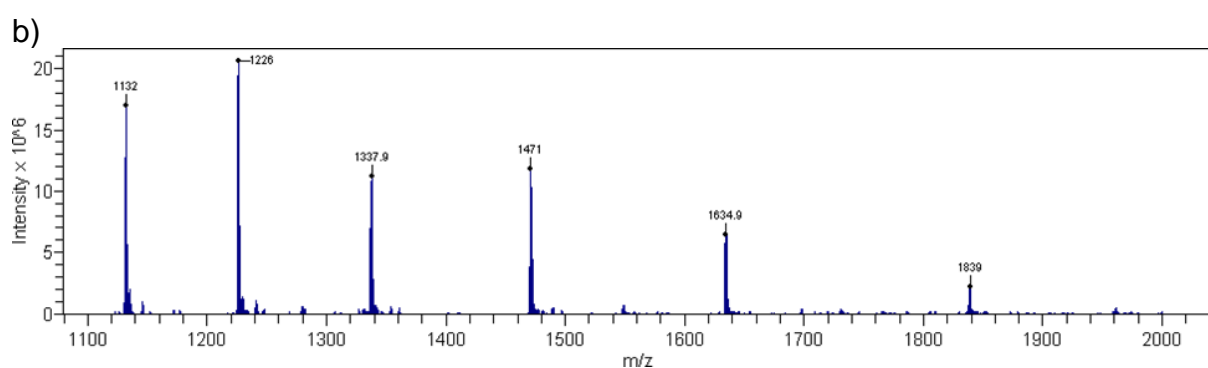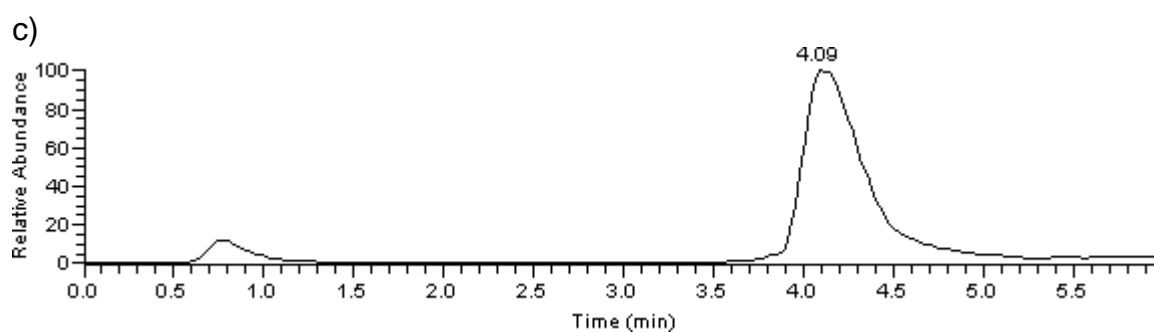

(a) deconvoluted, (b) non-deconvoluted, and (c) TIC mass spectrometry data for HER2DARPin(D39C) reacted with NMM.

**Supplementary Figure 13. HER2DARPin(H59C) in PBS, 1 mM EDTA.**  
**Expected mass 14562.4 Da**

**Sequence**

MRGSHHHHHHGS~~D~~LGKKLL~~E~~AARAGQDDEVRI~~L~~MANGADVNAKDEYGLTPLYLATAHGCLEI  
VEVLLKNGADVNAVDAIGFTPLHLAAFIGHLEIAEVLLKHGADVNAQDKFGKTAFDISIGNG  
NEDLAEILQKLN

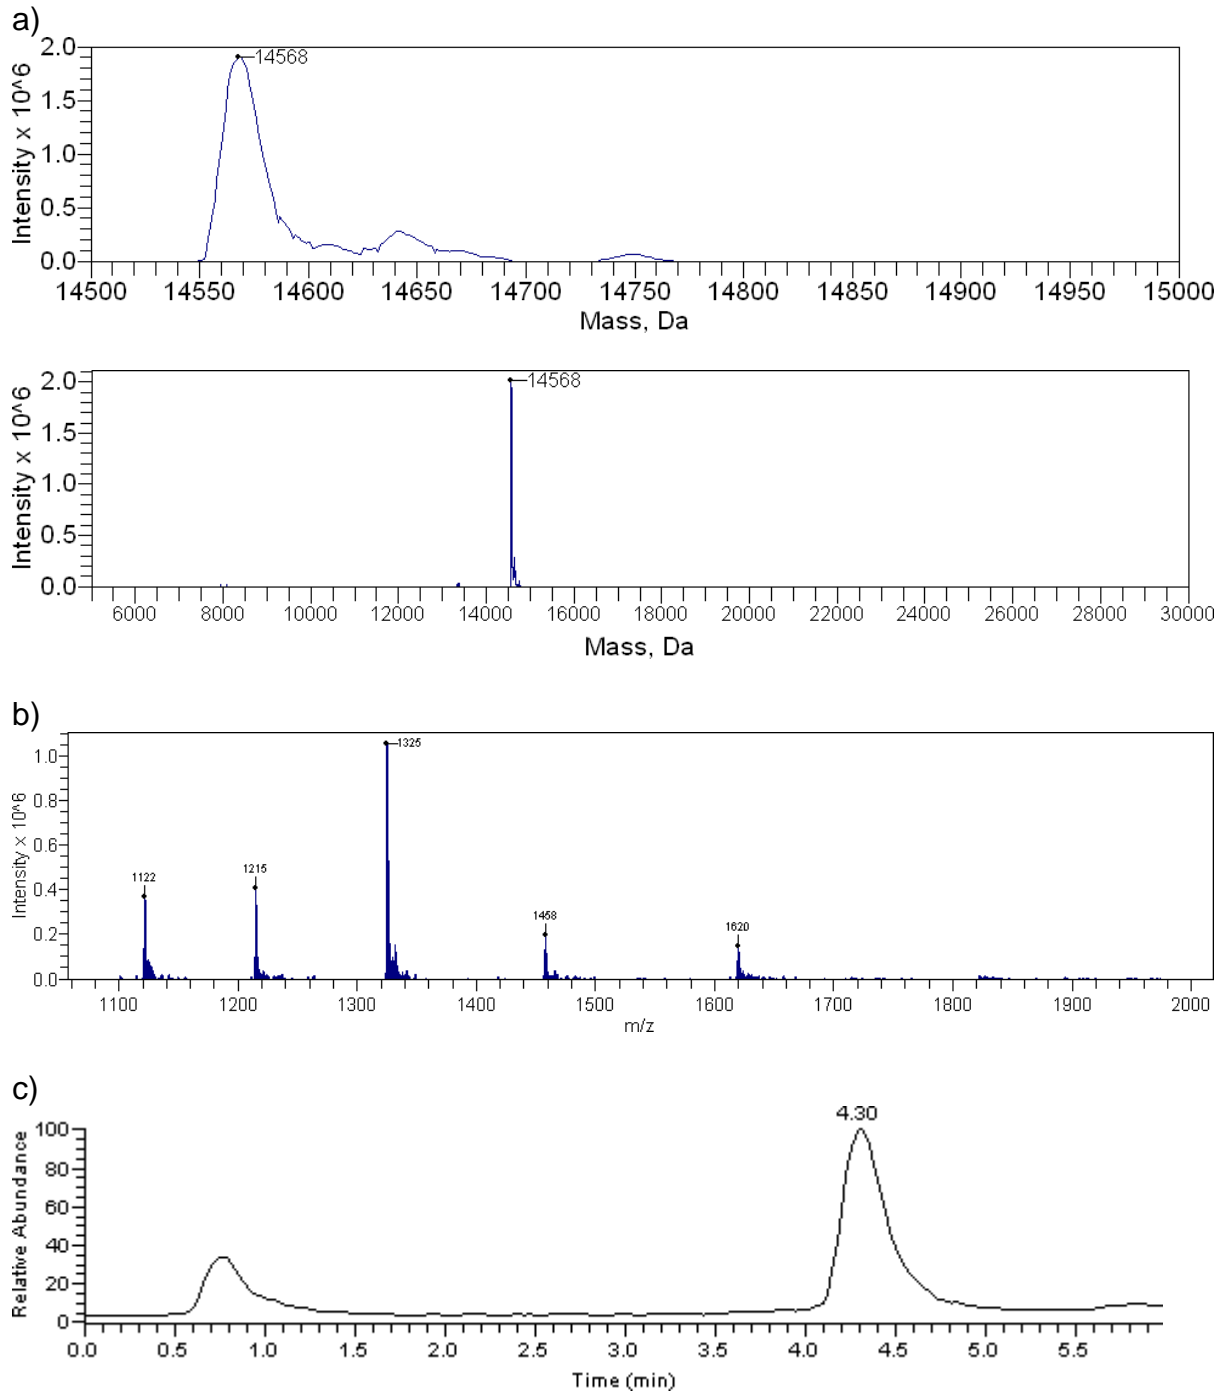

(a) deconvoluted, (b) non-deconvoluted, and (c) TIC mass spectrometry data for HER2DARPin(H59C).

**Supplementary Figure 14. HER2DARPin(H59C) with 1 mM BrAcEGMe, 1 mM EDTA, in PBS pH 7.4, 10% DMF, 2 h, at 4 °C.**

**Expected mass (unmodified) 14562.4 Da**

**Expected mass (modified) 14677.6 Da**

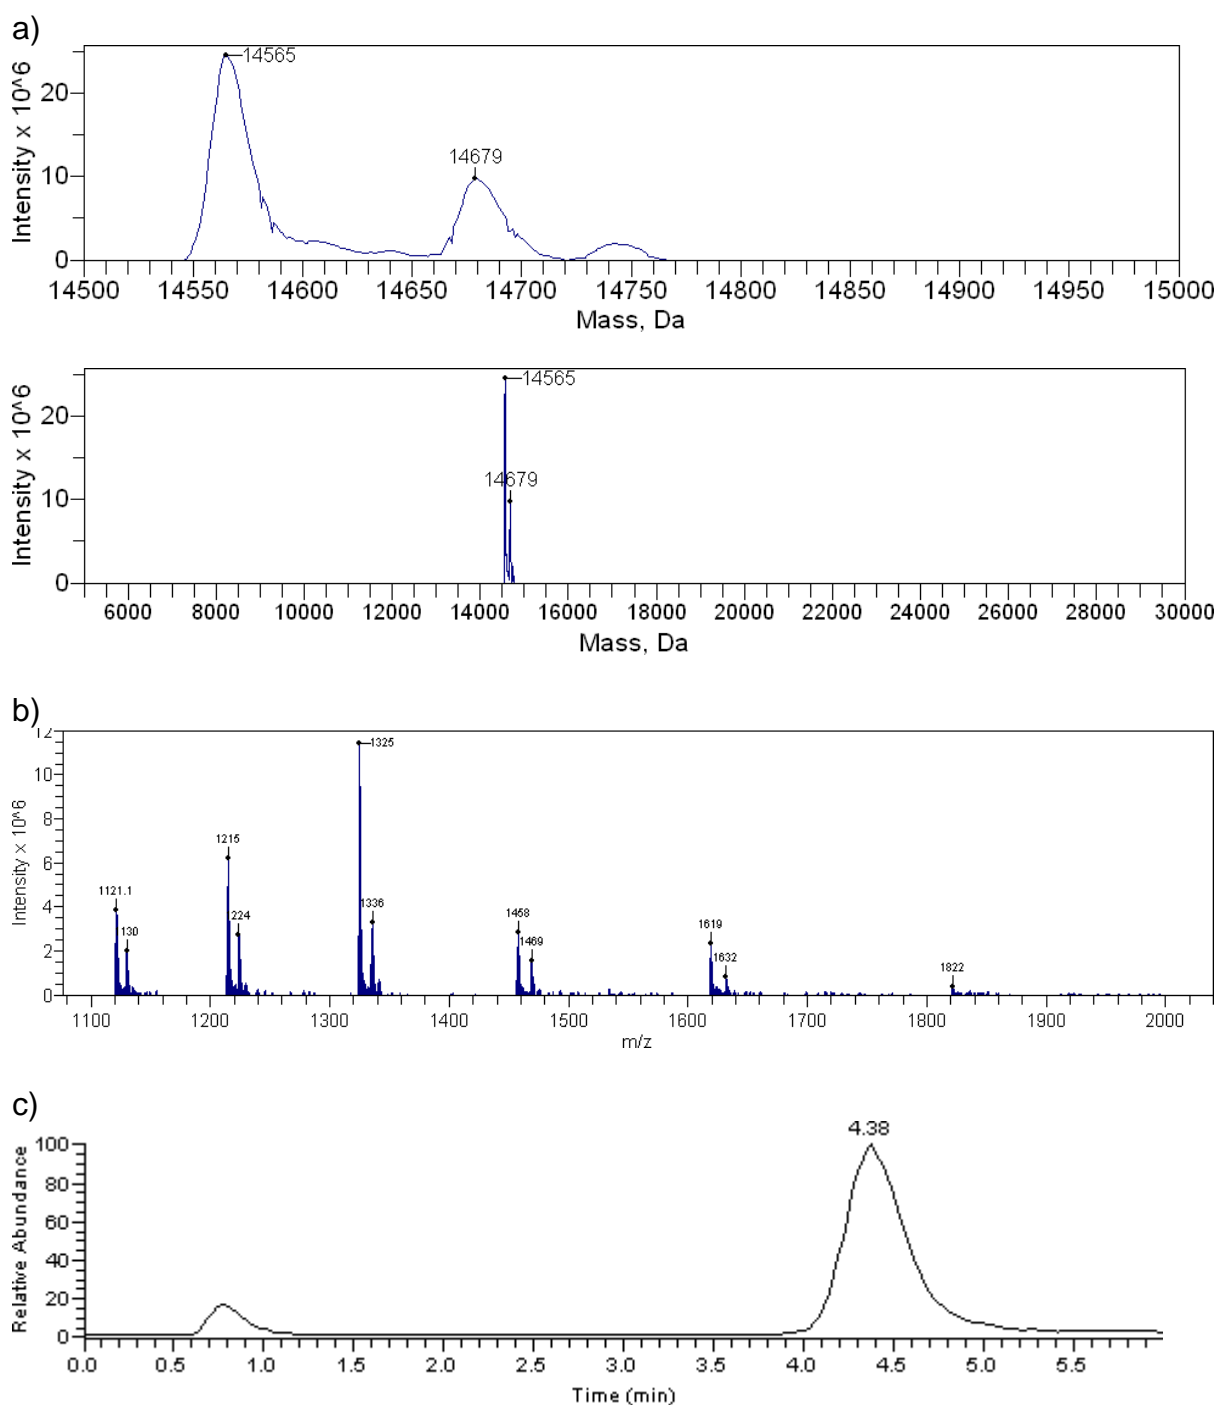

(a) deconvoluted, (b) non-deconvoluted, and (c) TIC mass spectrometry data for HER2DARPin(H59C) reacted with BrAcEGMe.

**Supplementary Figure 15. HER2DARPin(H59C) with 1 mM NMM, 1 mM EDTA, in PBS pH 7.4, 10% DMF, 1 h, at 4 °C.**

**Expected mass (unmodified) 14562.4 Da**

**Expected mass (modified) 14673.5 Da**

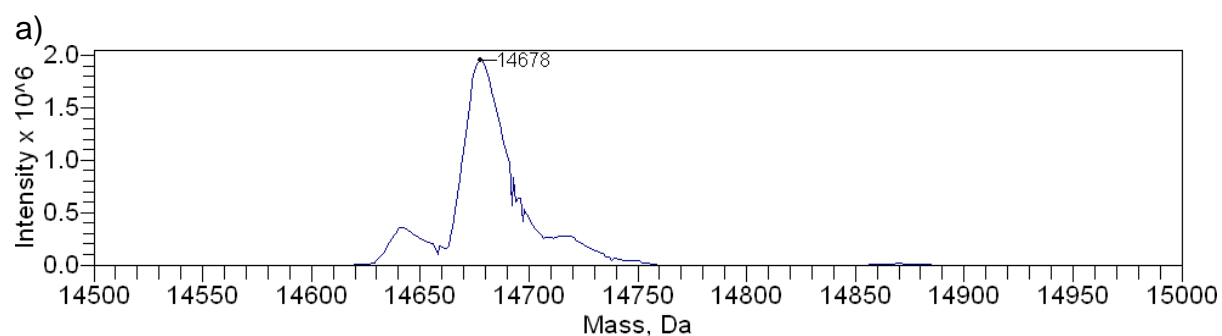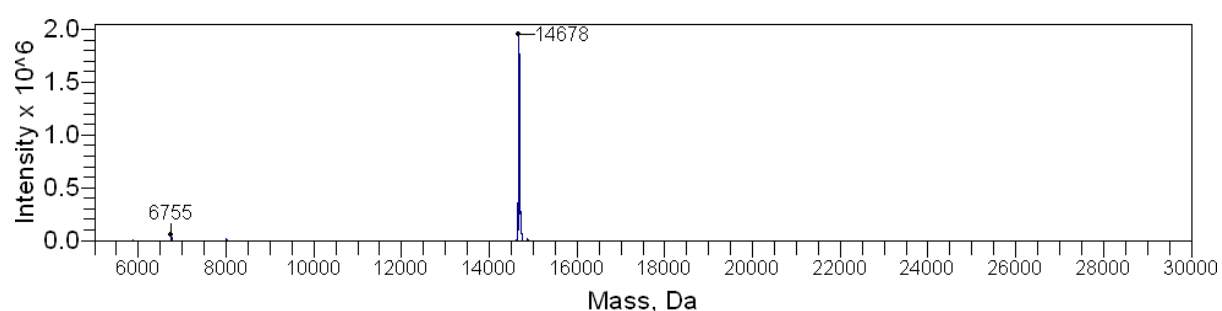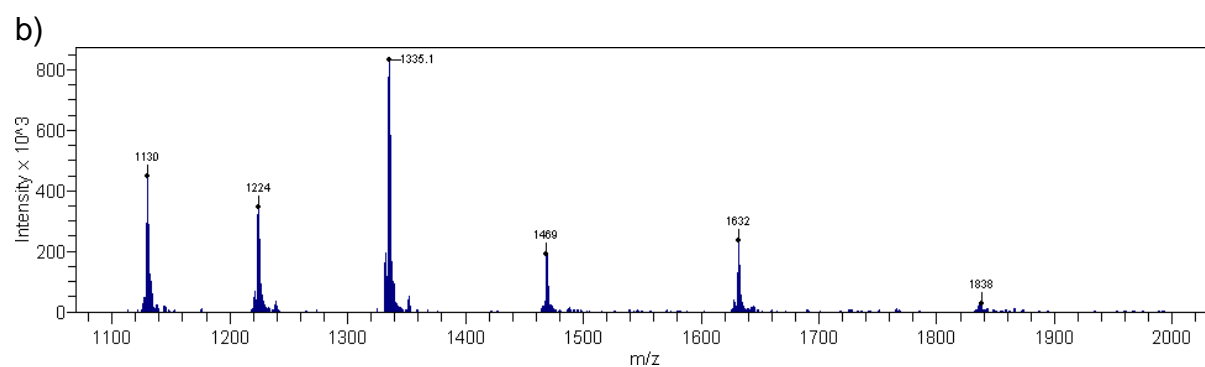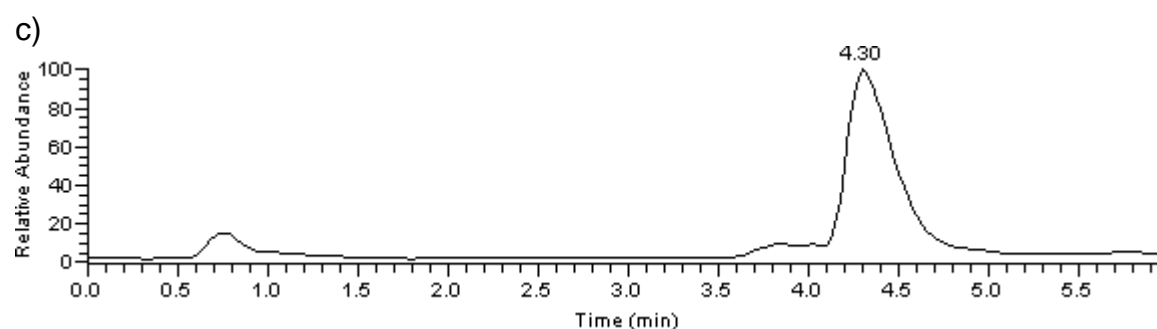

(a) deconvoluted, (b) non-deconvoluted, and (c) TIC mass spectrometry data for HER2DARPin(H59C) reacted with NMM.

**Supplementary Figure 16. HER2DARPin(L60C) in PBS, 1 mM EDTA.**  
**Expected mass 14586.4 Da**

**Sequence**

MRGSHHHHHHGS~~DL~~GKKLL~~EA~~ARAGQDDEVRI~~LM~~ANGADVNAKDEYGLTPLYLATAHGHCEI  
VEVLLKNGADVNAVDAIGFTPLHLAAFIGHLEIAEVLLKHGADVNAQDKFGKTA~~FD~~ISIGNG  
NEDLAEILQKLN

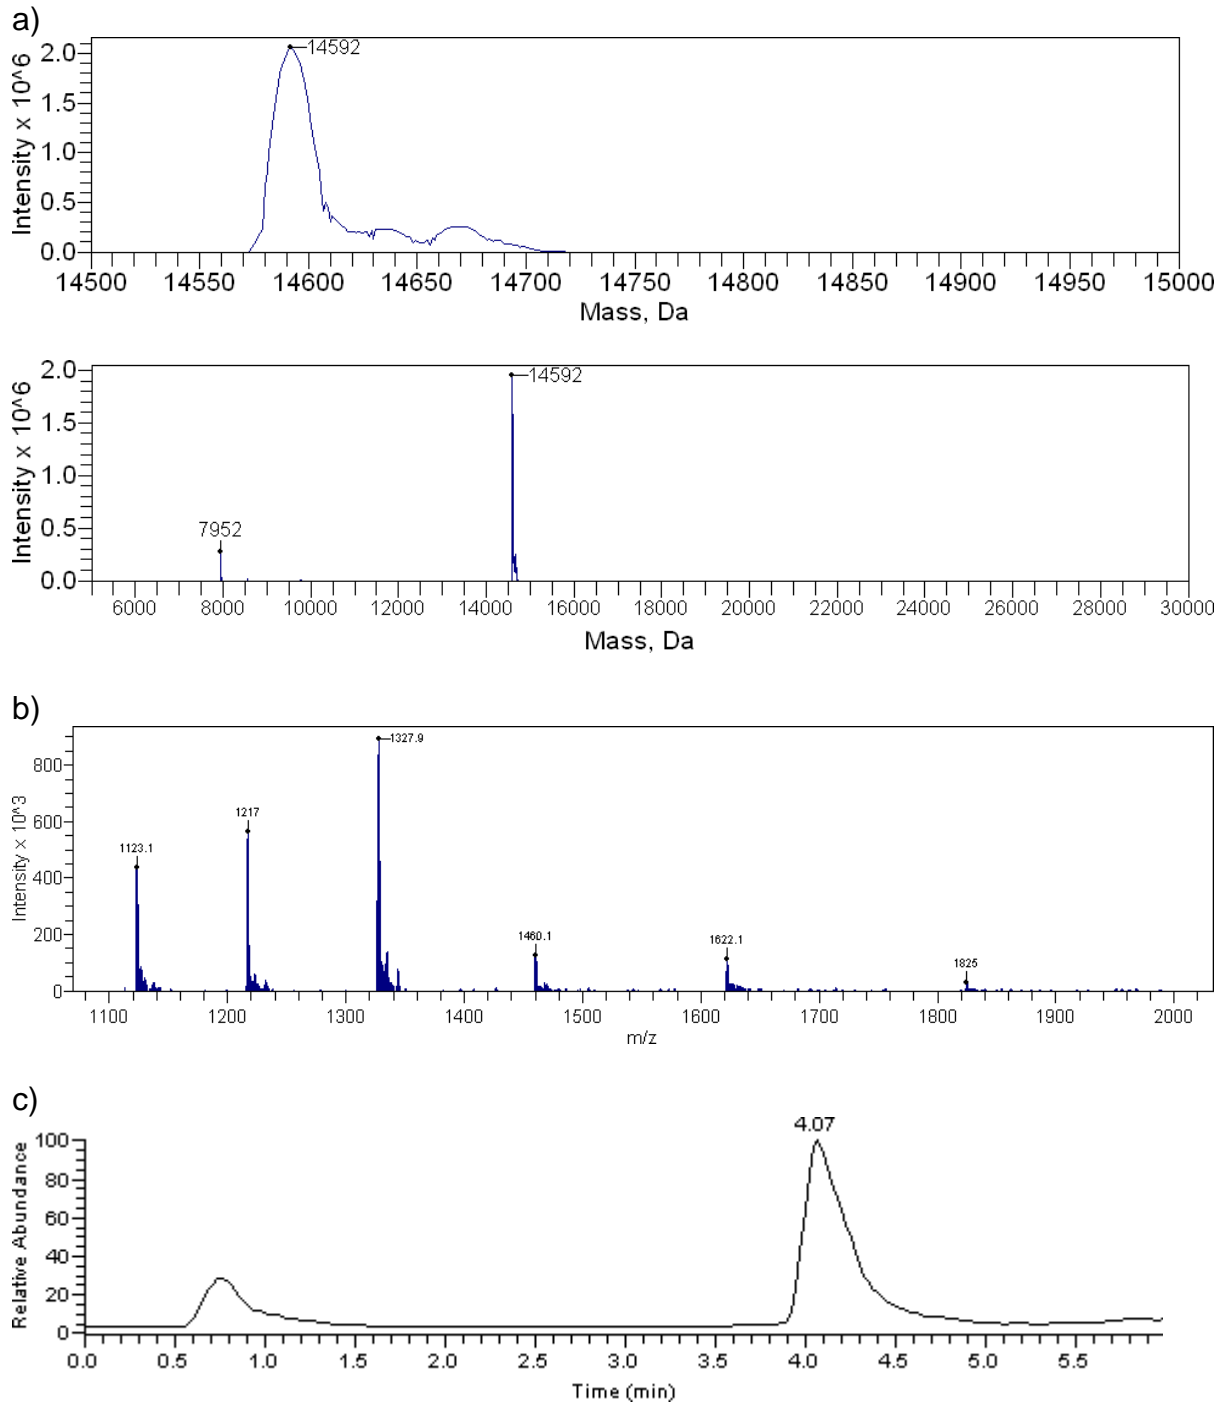

(a) deconvoluted, (b) non-deconvoluted, and (c) TIC mass spectrometry data for HER2DARPin(L60C).

**Supplementary Figure 17. HER2DARPin(L60C) with 1 mM BrAcEGMe, 1 mM EDTA, in PBS pH 7.4, 10% DMF, 2 h, at 4 °C.**

**Expected mass (unmodified) 14586.4 Da**

**Expected mass (modified) 14601.6 Da**

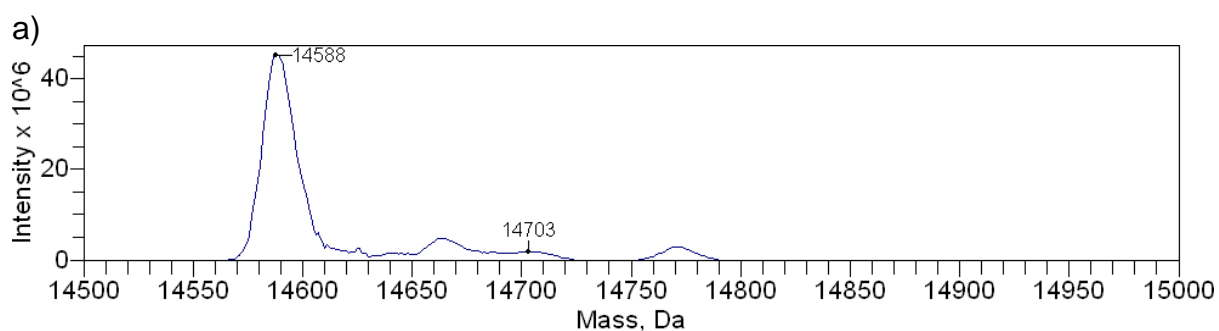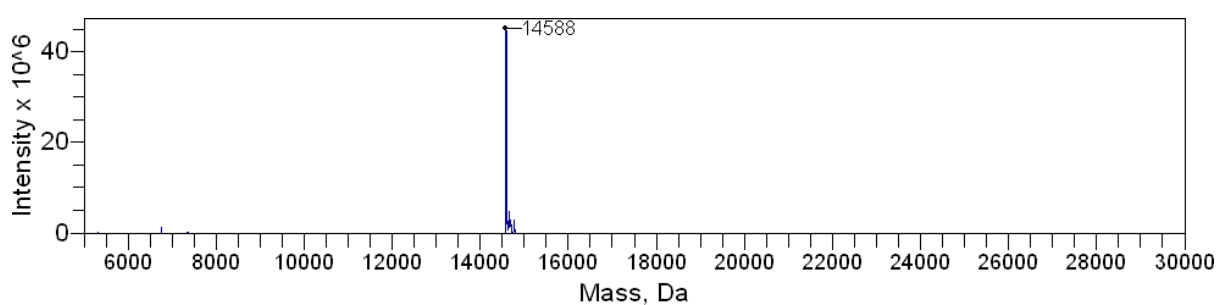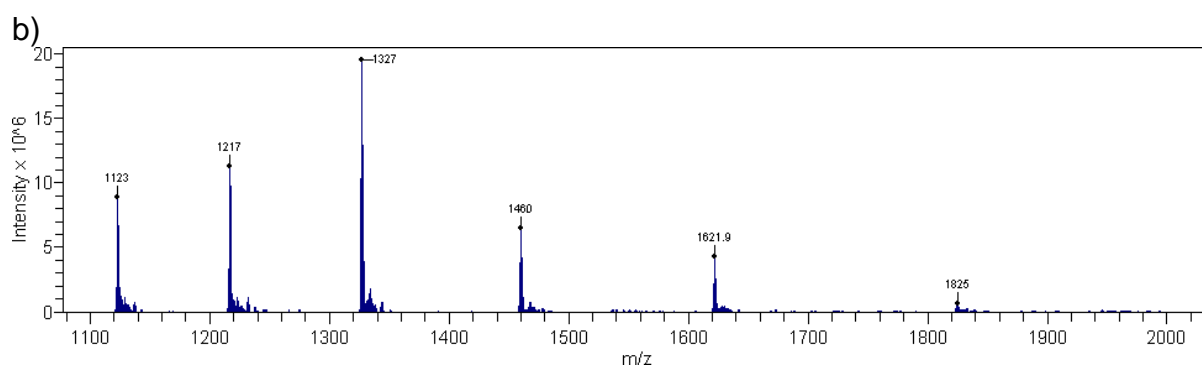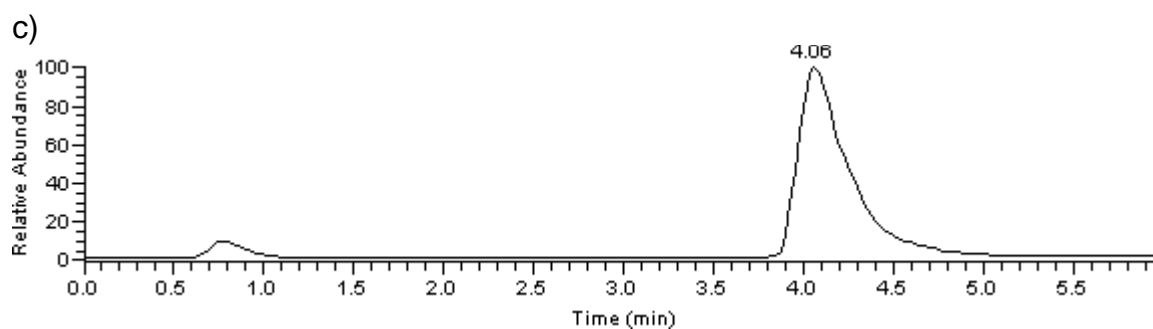

(a) deconvoluted, (b) non-deconvoluted, and (c) TIC mass spectrometry data for HER2DARPin(L60C) reacted with BrAcEGMe.

**Supplementary Figure 18. HER2DARPin(L60C) with 1 mM NMM, 1 mM EDTA, in PBS pH 7.4, 10% DMF, 1 h, at 4 °C.**

**Expected mass (unmodified) 14586.4 Da**

**Expected mass (modified) 14597.5 Da**

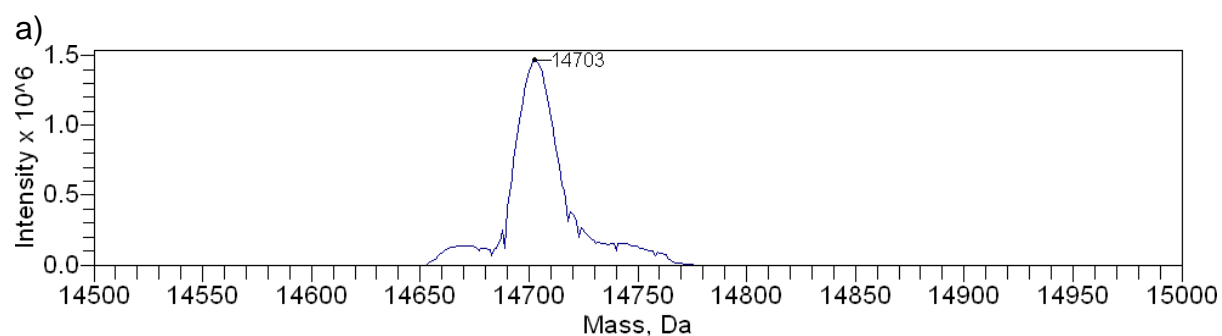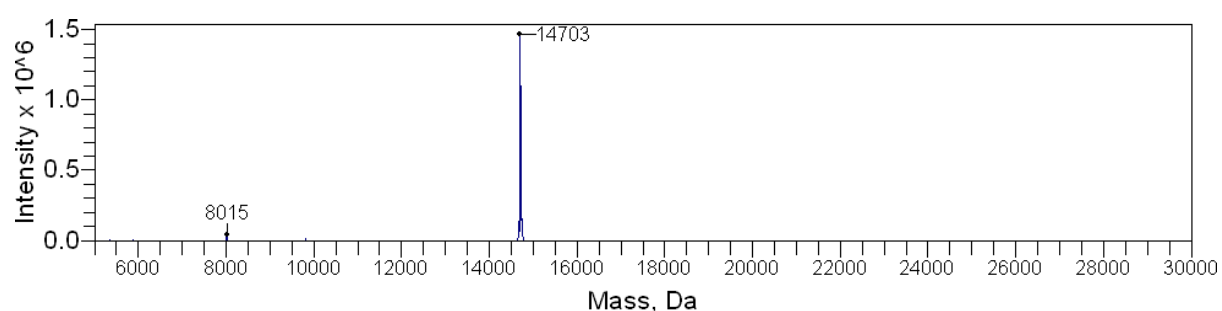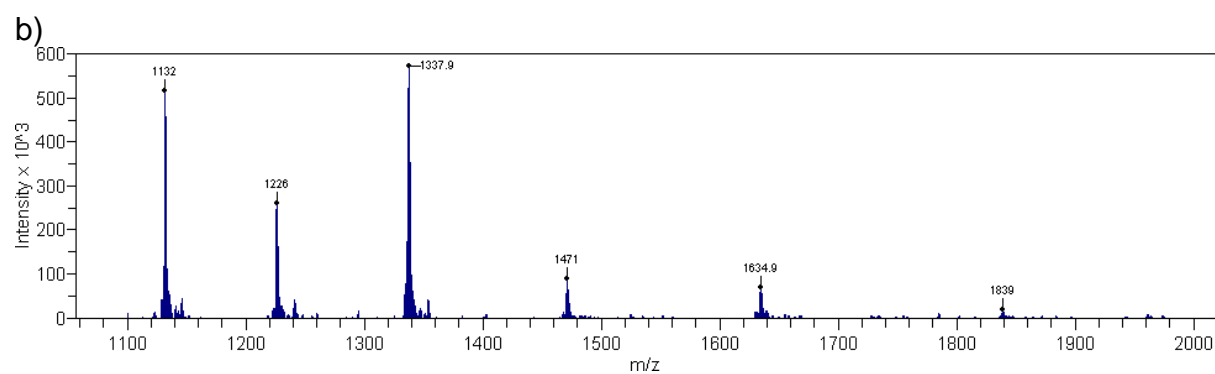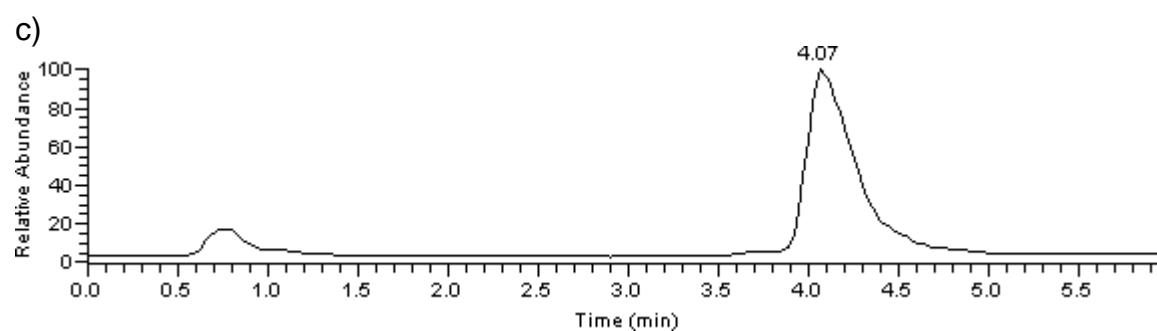

(a) deconvoluted, (b) non-deconvoluted, and (c) TIC mass spectrometry data for HER2DARPin(L60C) reacted with NMM.

**Supplementary Figure 19. HER2DARPin(E61C) in PBS, 1 mM EDTA.**  
**Expected mass 14570.4 Da**

**Sequence**

MRGSHHHHHHGS~~DLG~~GKKLL~~EA~~ARAGQDDEVRI~~LM~~ANGADVNAKDEYGLTPLYLATAHGHLCI  
VEVLLKNGADVNAVDAIGFTPLHLAAFIGHLEIAEVLLKHGADVNAQDKFGKTAFDISIGNG  
NEDLAEILQKLN

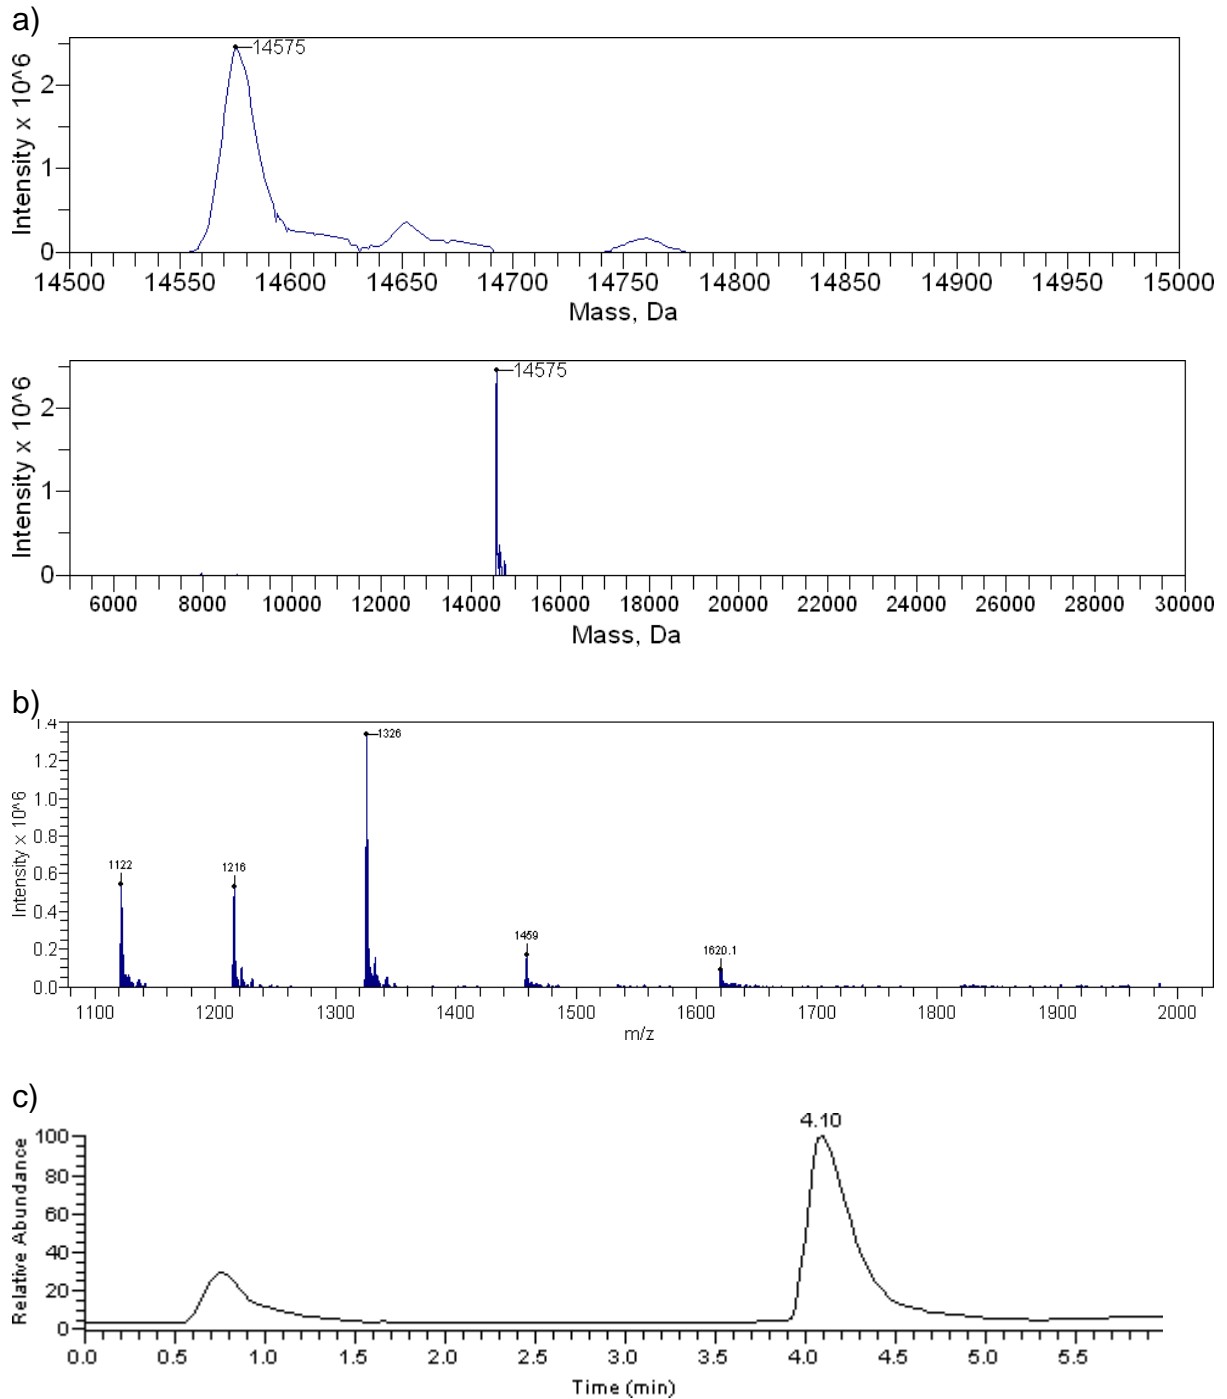

(a) deconvoluted, (b) non-deconvoluted, and (c) TIC mass spectrometry data for HER2DARPin(E61C).



**Supplementary Figure 20. HER2DARPin(E61C) with 1 mM BrAcEGMe, 1 mM EDTA, in PBS pH 7.4, 10% DMF, 2 h, at 4 °C.**

**Expected mass (unmodified) 14570.4 Da**

**Expected mass (modified) 14685.6 Da**

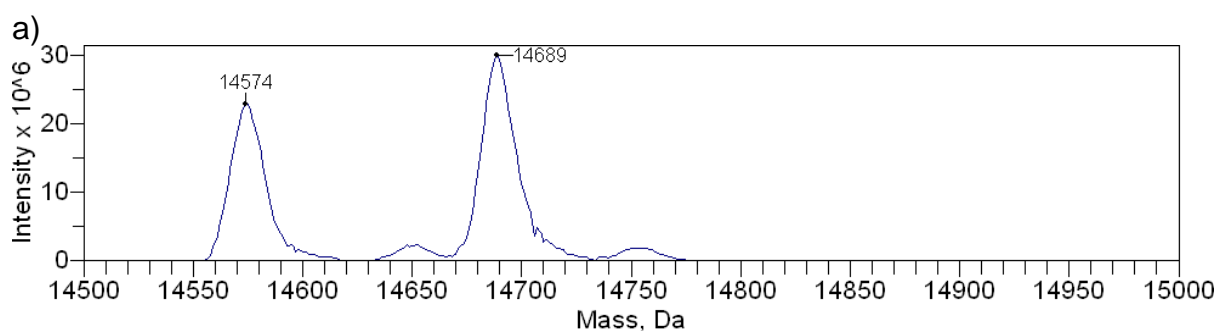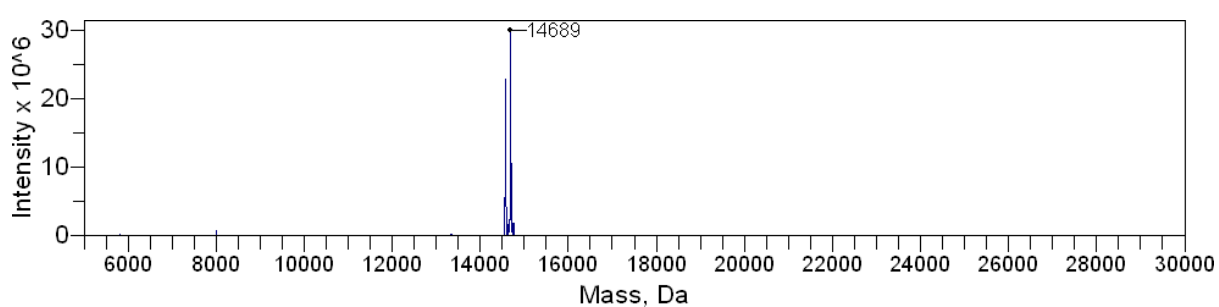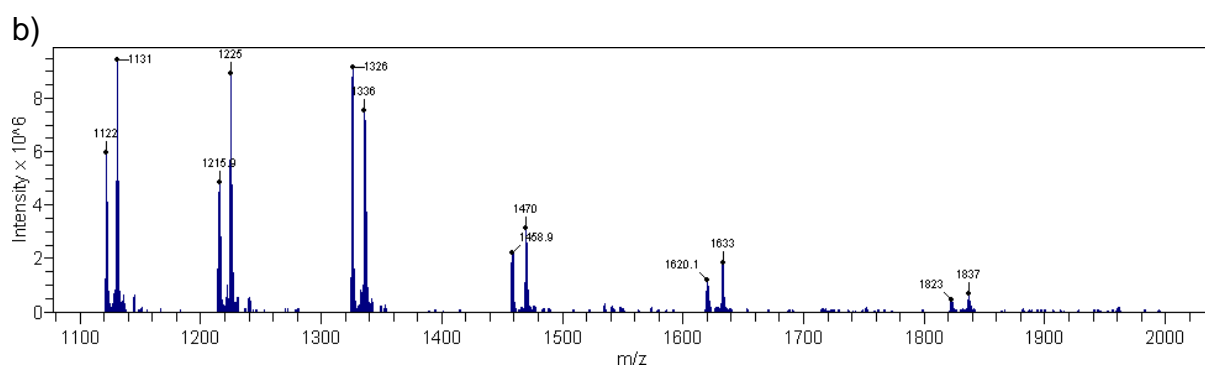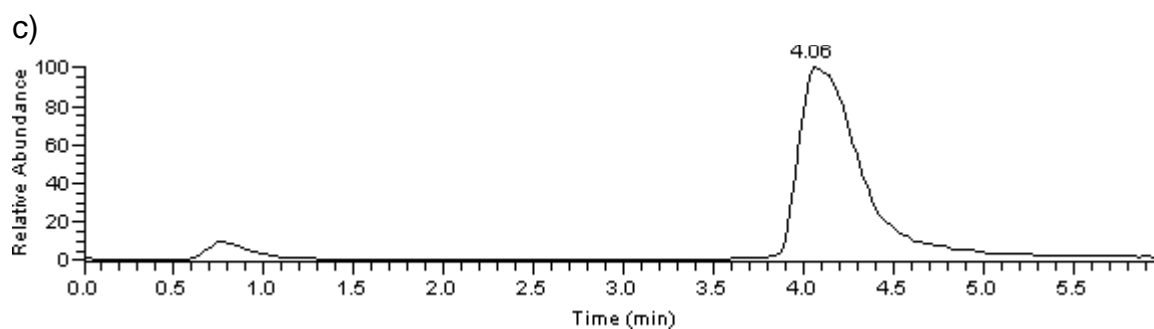

(a) deconvoluted, (b) non-deconvoluted, and (c) TIC mass spectrometry data for HER2DARPin(E61C) reacted with BrAcEGMe.

**Supplementary Figure 21. HER2DARPin(E61C) with 1 mM NMM, 1 mM EDTA, in PBS pH 7.4, 10% DMF, 1 h, at 4 °C.**

**Expected mass (unmodified) 14570.4 Da**

**Expected mass (modified) 14681.5 Da**

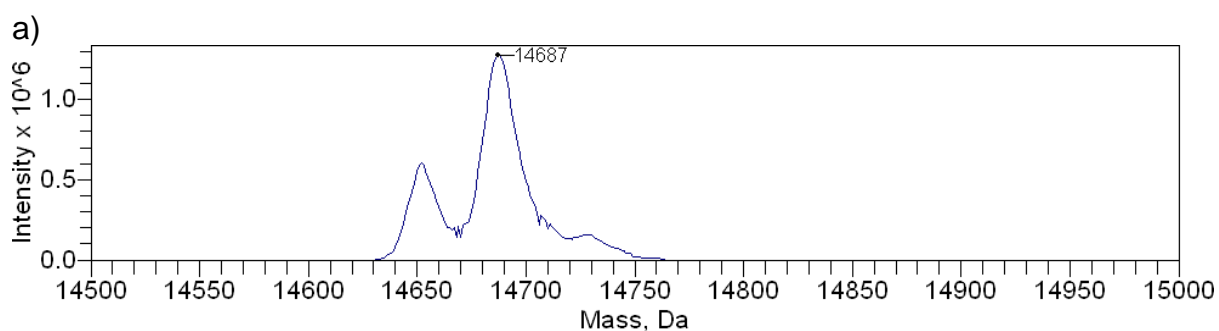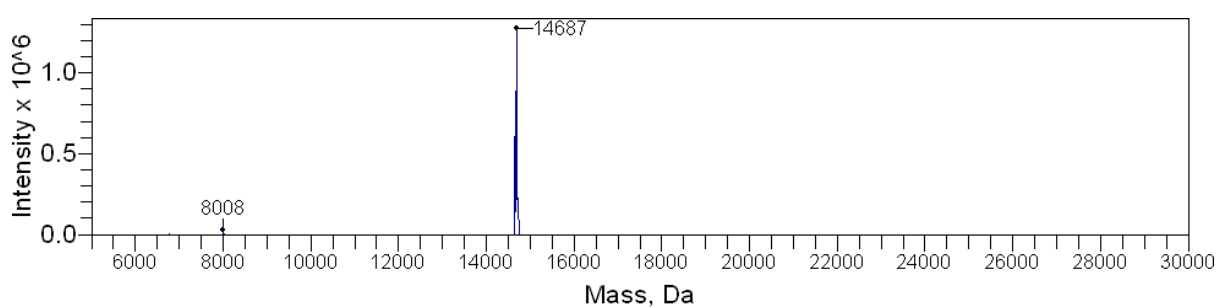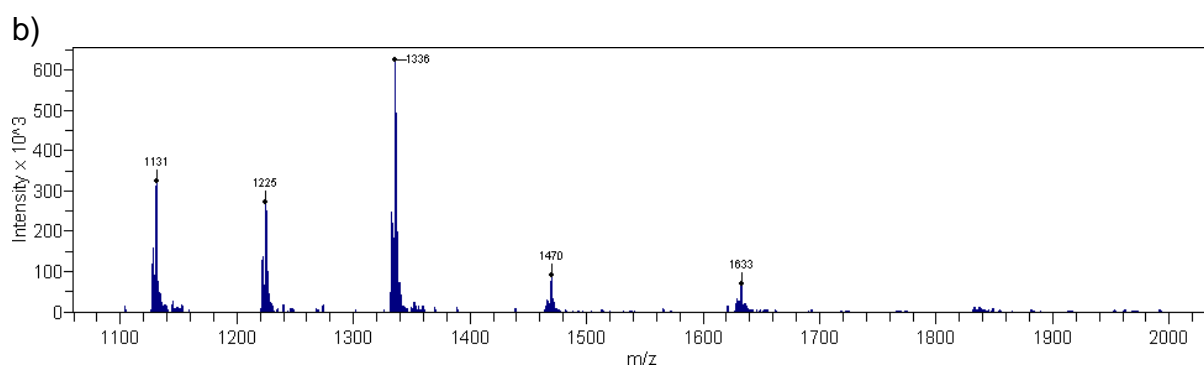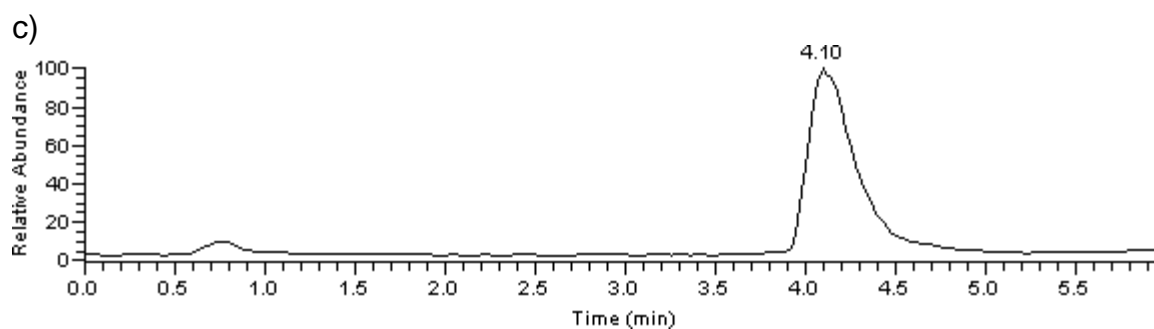

(a) deconvoluted, (b) non-deconvoluted, and (c) TIC mass spectrometry data for HER2DARPin(E61C) reacted with NMM.

**Supplementary Figure 22. HER2DARPin(E64C) in PBS, 1 mM EDTA.**  
**Expected mass 14570.4 Da**

**Sequence**

MRGSHHHHHGSDLGKKLLEAARAGQDDEVRI LMANGADVNAKDEYGLTPLYLATAHGHLEI  
V **C**VLLKNGADVNAVDAIGFTPLHLAAFIGHLEIAEVLLKHGADVNAQDKFGKTAFDISIGNG  
NEDLAEILQKLN

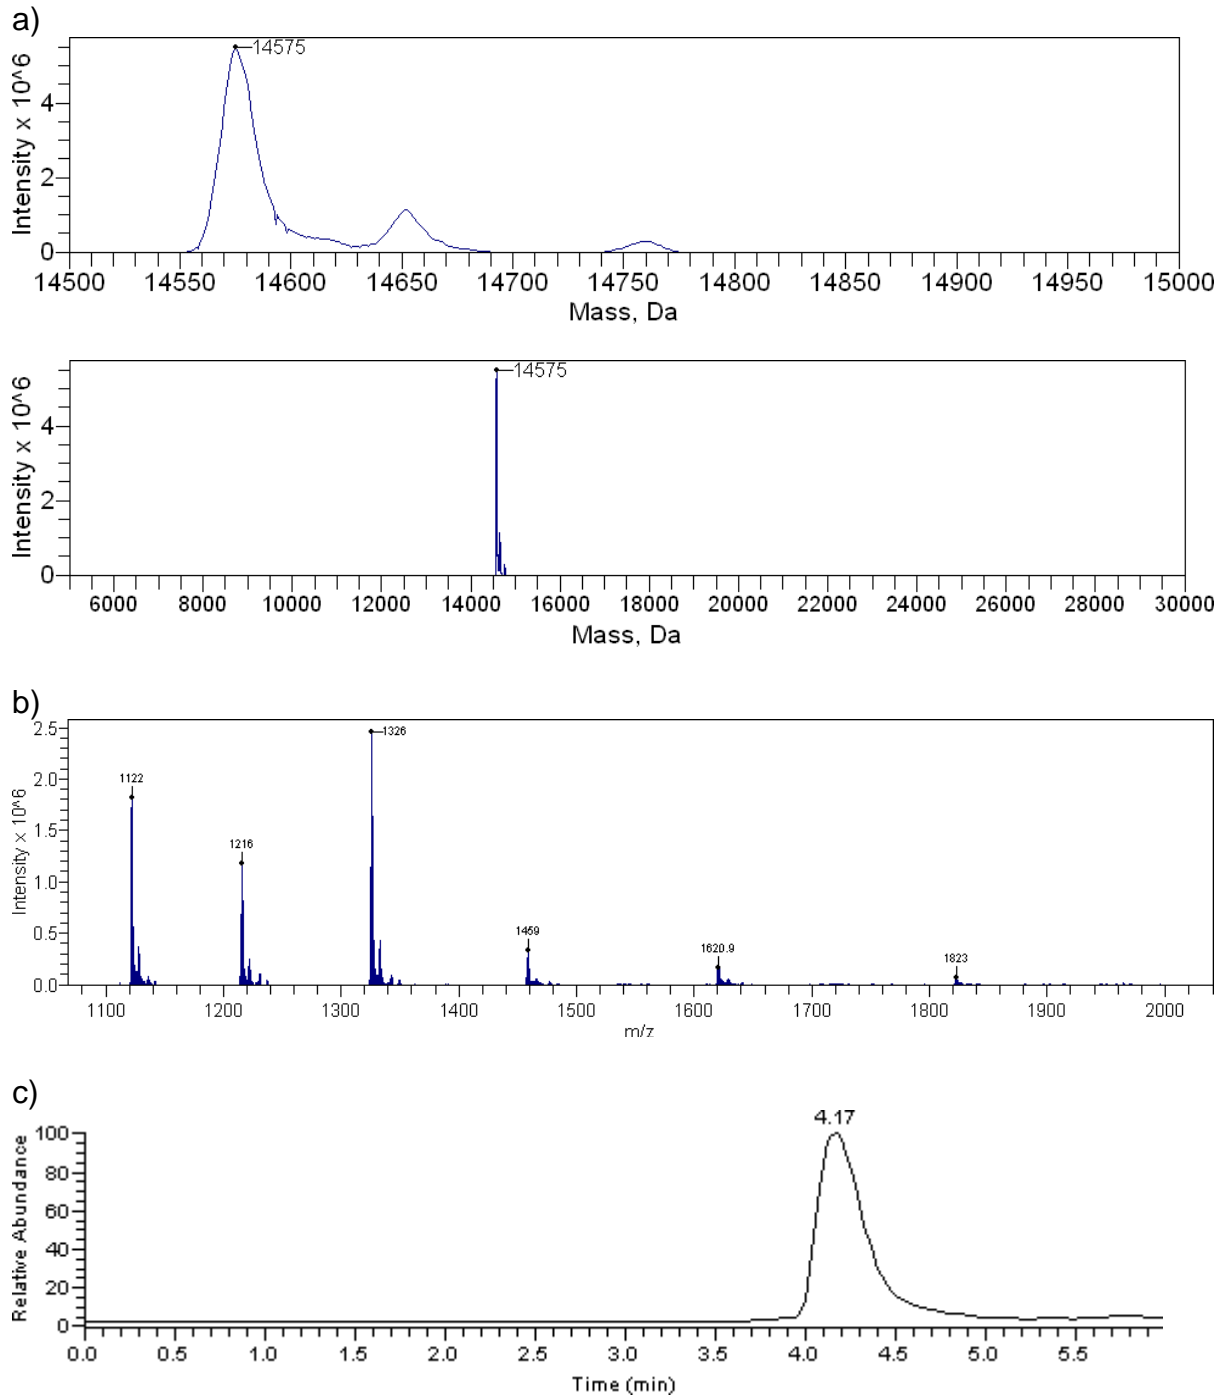

(a) deconvoluted, (b) non-deconvoluted, and (c) TIC mass spectrometry data for HER2DARPin(E64C).

**Supplementary Figure 23. HER2DARPin(E64C) with 1 mM BrAcEGMe, 1 mM EDTA, in PBS pH 7.4, 10% DMF, 2 h, at 4 °C.**

**Expected mass (unmodified) 14570.4 Da**

**Expected mass (modified) 14685.6 Da**

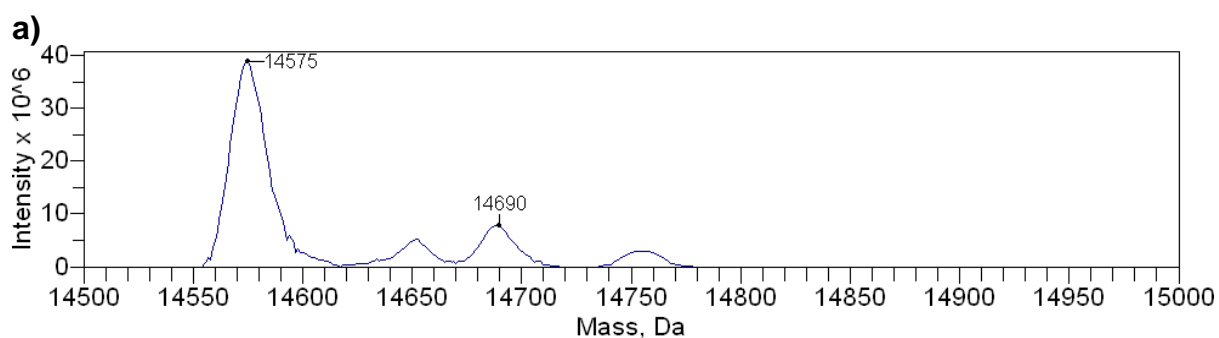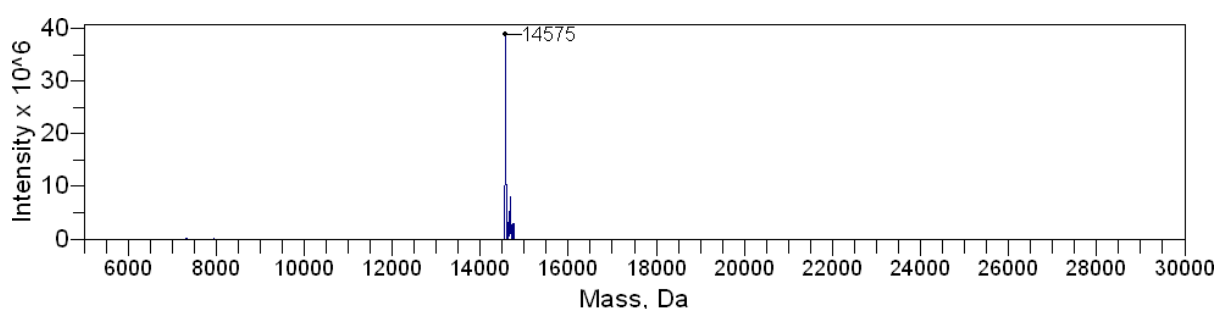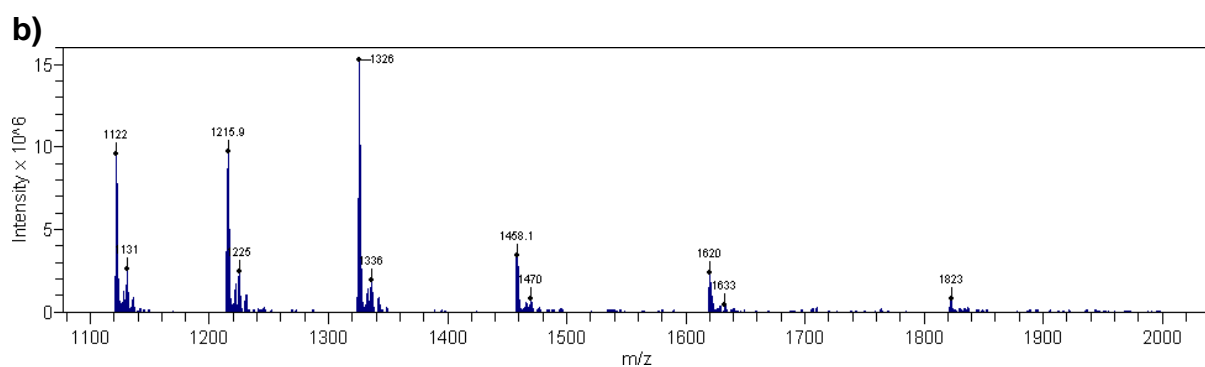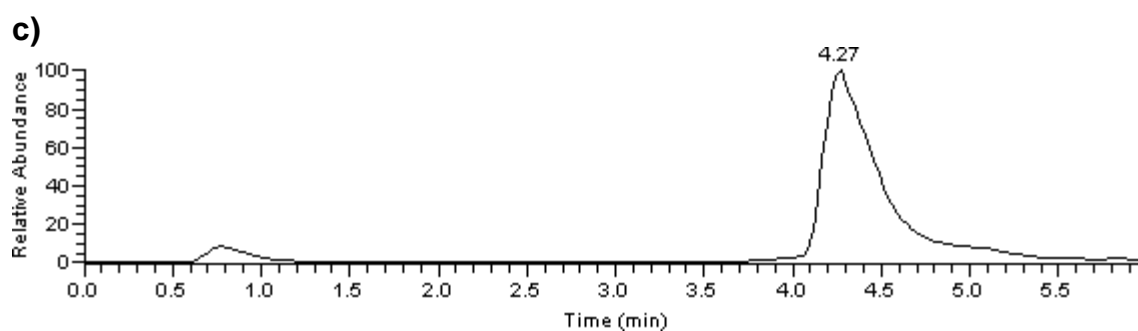

(a) deconvoluted, (b) non-deconvoluted, and (c) TIC mass spectrometry data for HER2DARPin(E64C) reacted with BrAcEGMe.

**Supplementary Figure 24. HER2DARPin(E64C) with 1 mM NMM, 1 mM EDTA, in PBS pH 7.4, 10% DMF, 1 h, at 4 °C.**

**Expected mass (unmodified) 14570.4 Da**

**Expected mass (modified) 14681.5 Da**

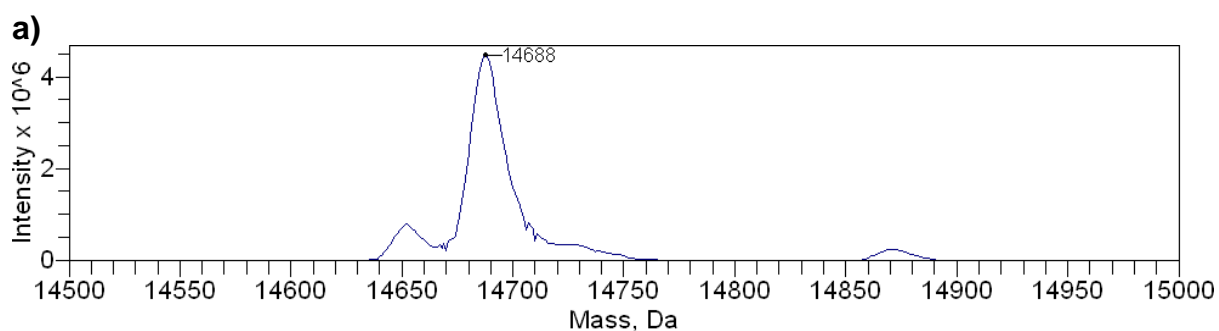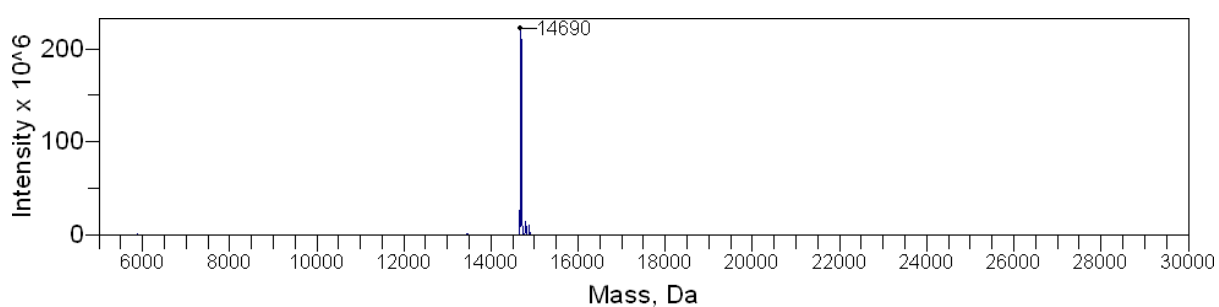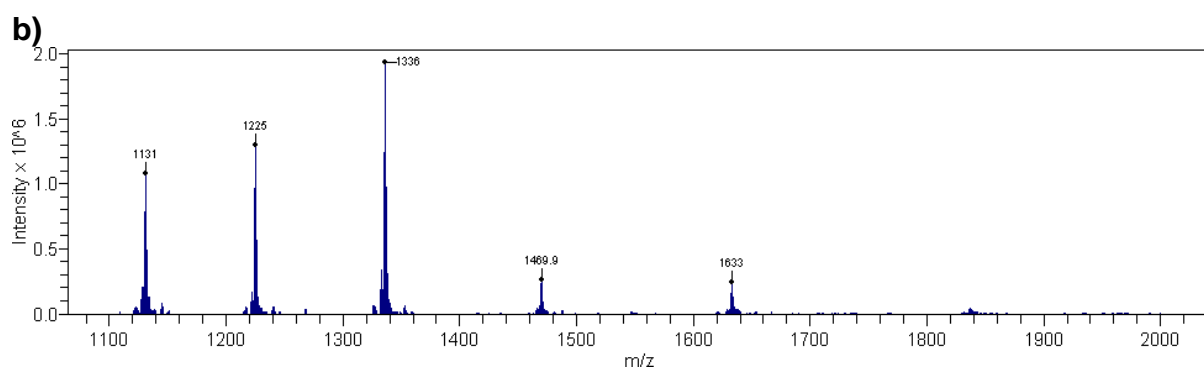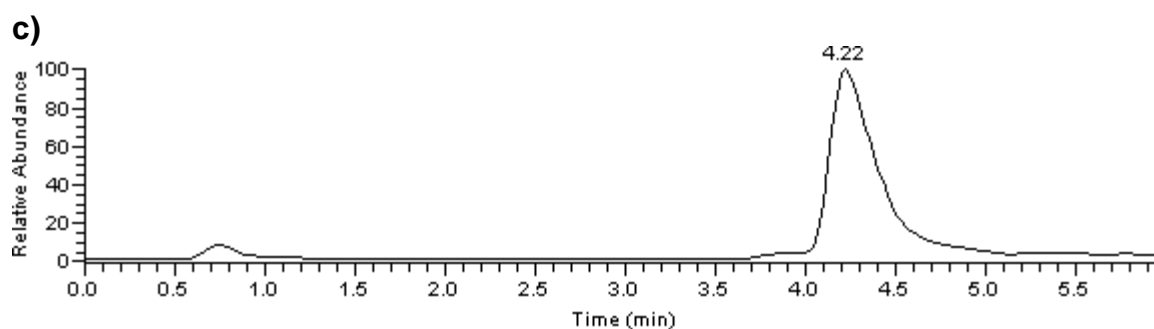

(a) deconvoluted, (b) non-deconvoluted, and (c) TIC mass spectrometry data for HER2DARPin(E64C) reacted with NMM.

**Supplementary Figure 25. HER2DARPin(V65C) in PBS, 1 mM EDTA.**  
**Expected mass 14600.4 Da**

**Sequence**

MRGSHHHHHHGSDLGKKLLEAARAGQDDEVRI LMANGADVNAKDEYGLTPLYLATAHGHLEI  
VECLLKNGADVNAVDAIGFTPLHLAAFIGHLEIAEVLLKHGADVNAQDKFGKTAFDISIGNG  
NEDLAEILQKLN

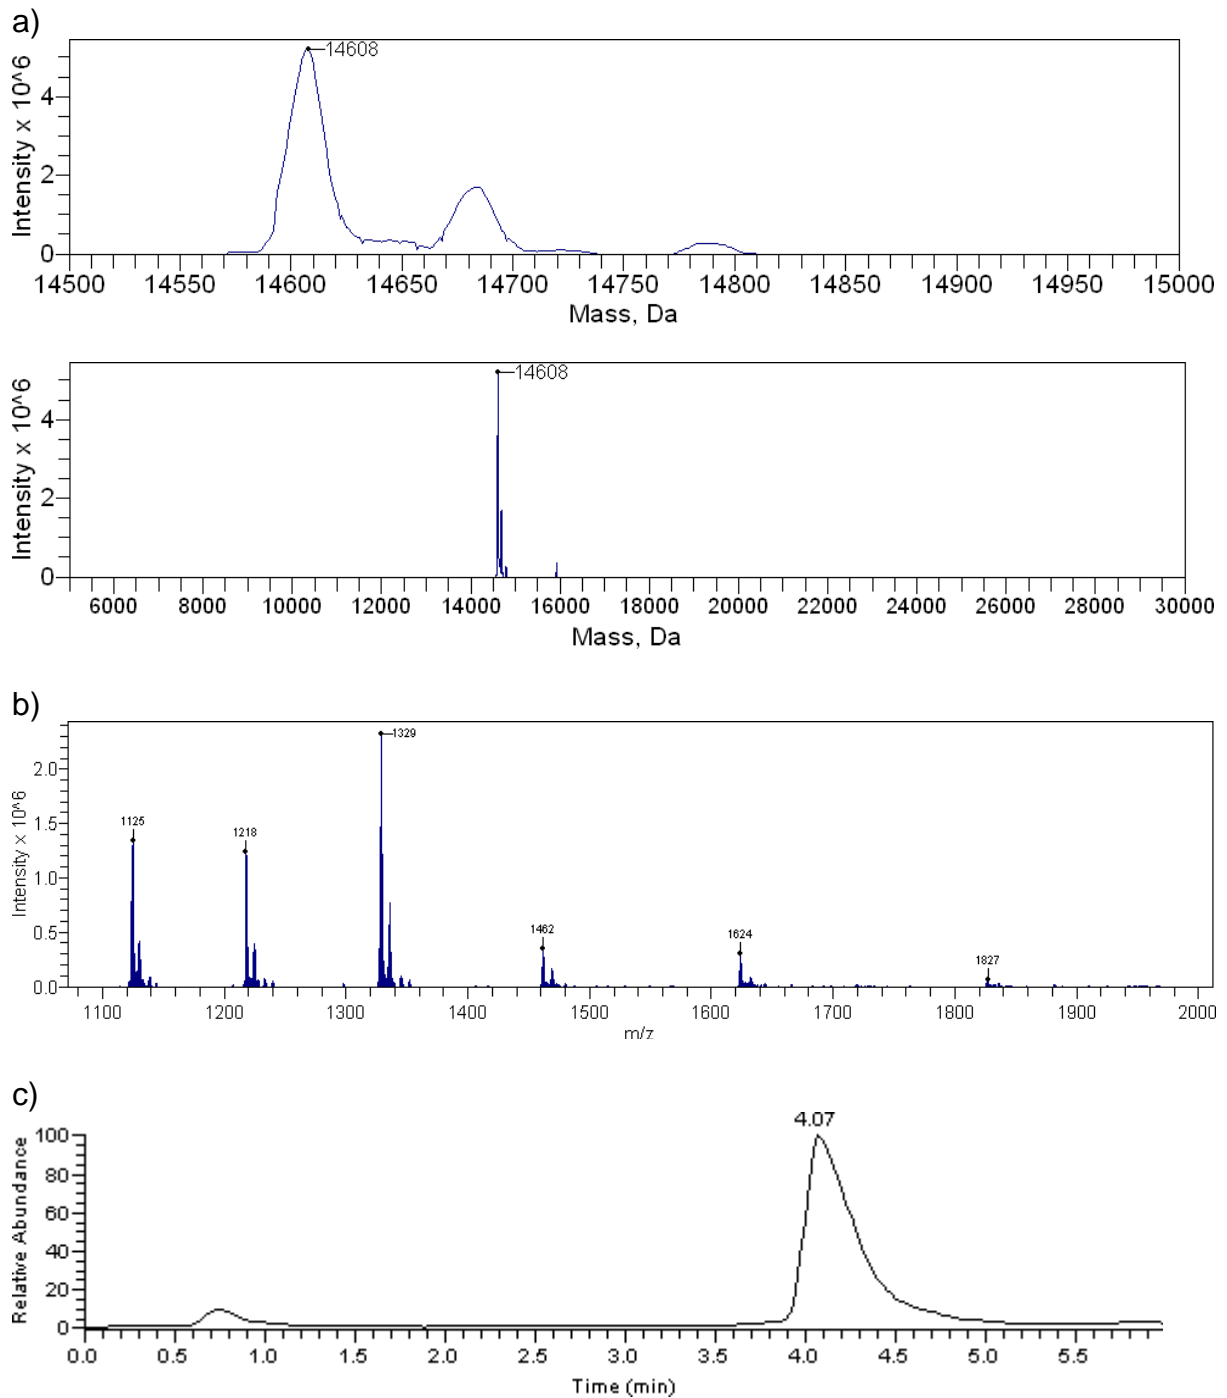

(a) deconvoluted, (b) non-deconvoluted, and (c) TIC mass spectrometry data for HER2DARPin(V65C).

**Supplementary Figure 26. HER2DARPin(V65C) with 1 mM BrAcEGMe, 1 mM EDTA, in PBS pH 7.4, 10% DMF, 2 h, at 4 °C.**

**Expected mass (unmodified) 14600.4 Da**

**Expected mass (modified) 14715.6 Da**

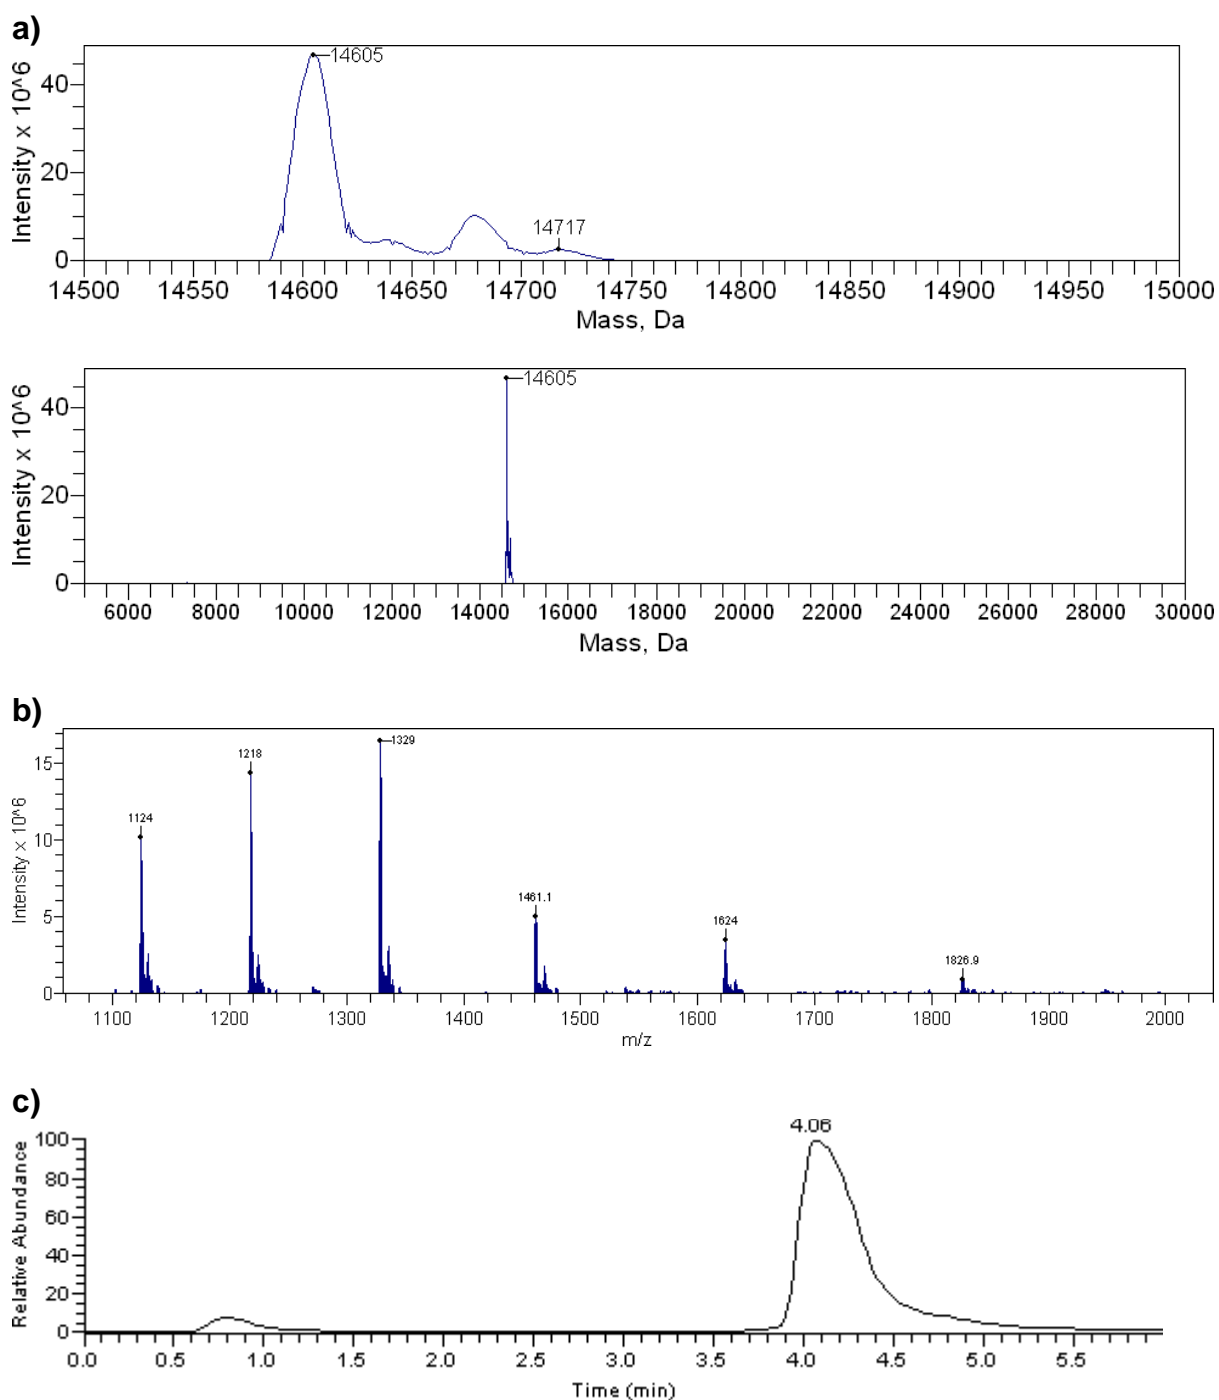

(a) deconvoluted, (b) non-deconvoluted, and (c) TIC mass spectrometry data for HER2DARPin(V65C) reacted with BrAcEGMe.

**Supplementary Figure 27. HER2DARPin(V65C) with 1 mM NMM, 1 mM EDTA, in PBS pH 7.4, 10% DMF, 1 h, at 4 °C.**

**Expected mass (unmodified) 14600.4 Da**

**Expected mass (modified) 14711.5 Da**

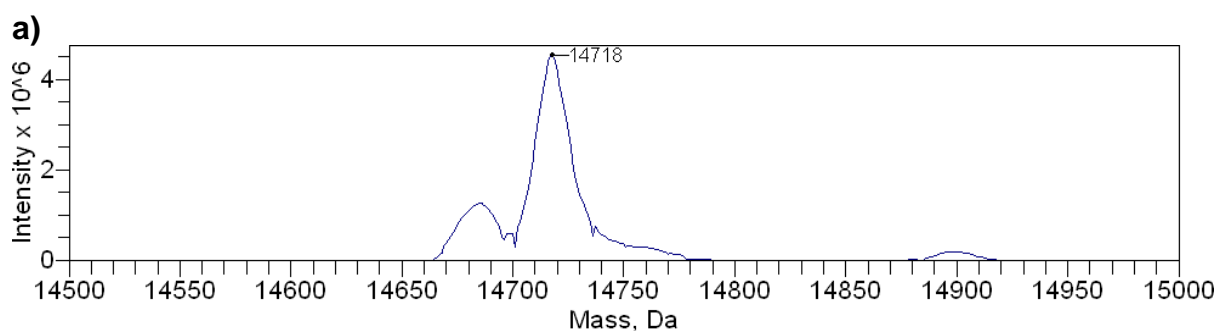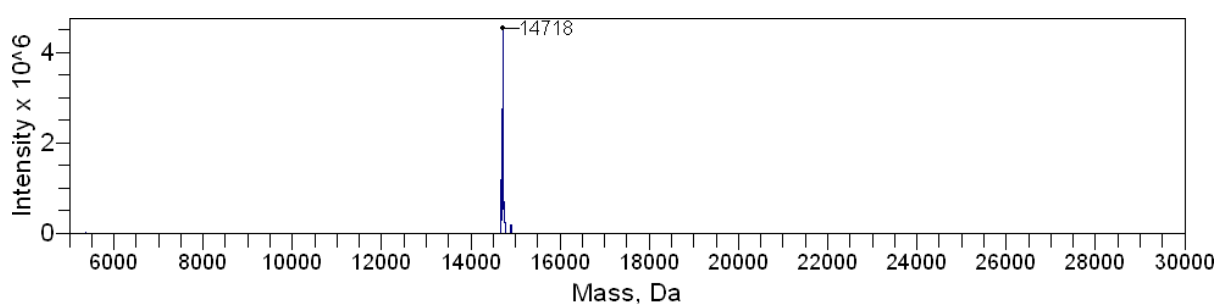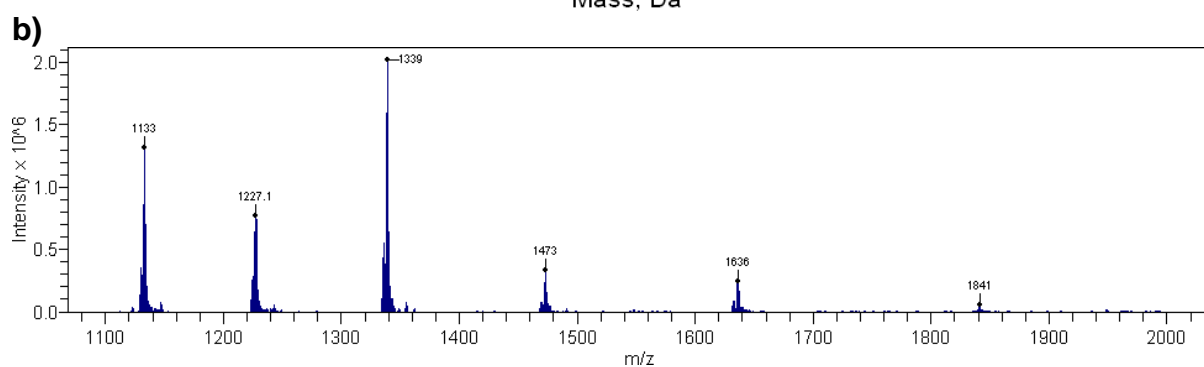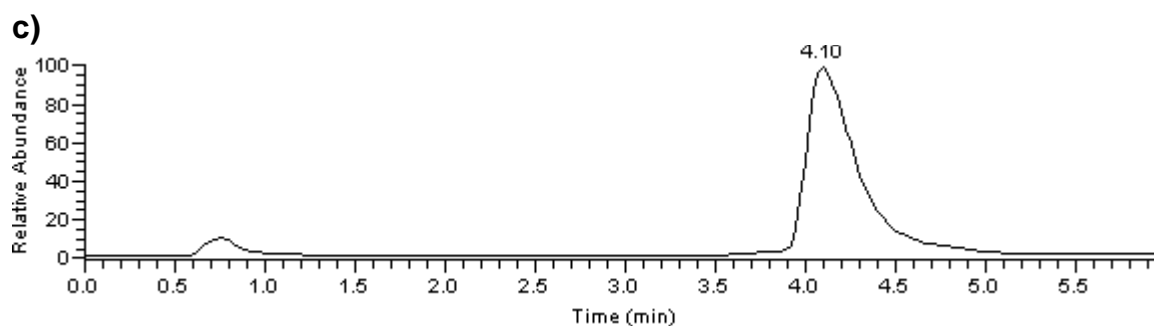

(a) deconvoluted, (b) non-deconvoluted, and (c) TIC mass spectrometry data for HER2DARPin(V65C) reacted with NMM.



**Supplementary Figure 28. HER2DARPin(K68C) in PBS, 1 mM EDTA.**  
**Expected mass 14571.4 Da**

**Sequence**

MRGSHHHHHHGS~~D~~LGKKLLLEAARAGQDDEVRI~~L~~MAN~~G~~ADVNAKDEYGLTPLYLATAHGHLEI  
VEVLL~~C~~NGADVNAVDAIGFTPLHLAAFIGHLEIAEVLLKHGADVNAQDKFGKTAFDISIGNG  
NEDLAEILQKLN

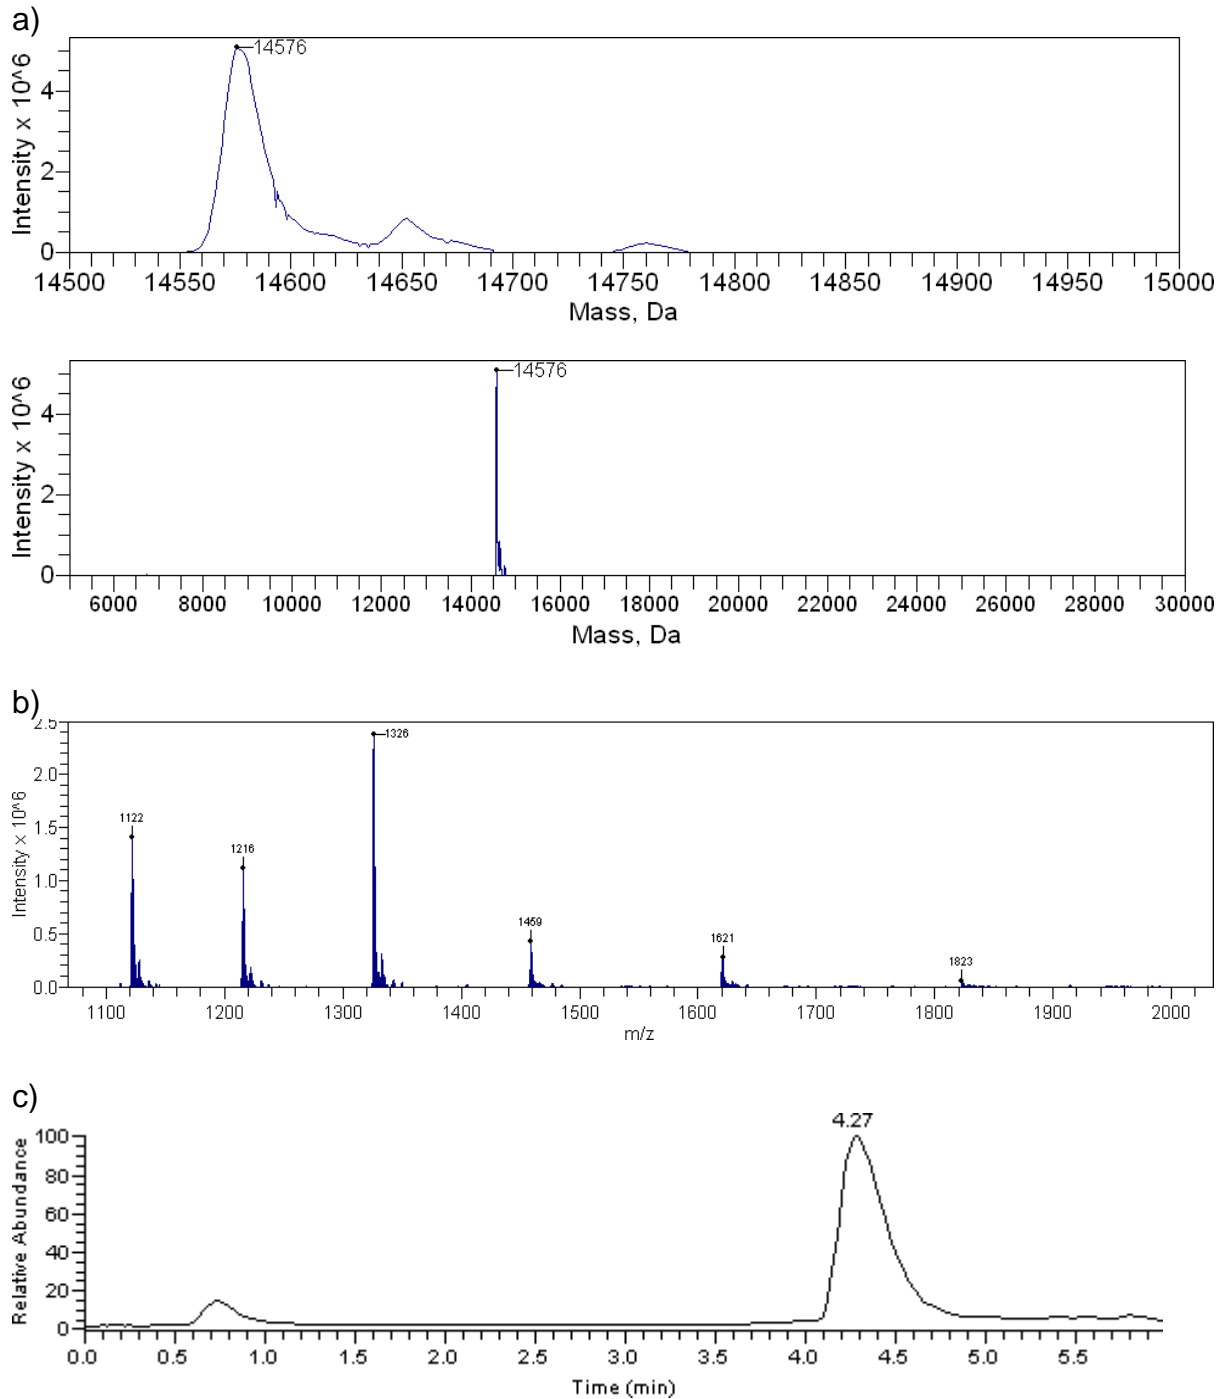

(a) deconvoluted, (b) non-deconvoluted, and (c) TIC mass spectrometry data for HER2DARPin(K68C).

**Supplementary Figure 29. HER2DARPin(K68C) with 1 mM BrAcEGMe, 1 mM EDTA, in PBS pH 7.4, 10% DMF, 2 h, at 4 °C.**

**Expected mass (unmodified) 14571.4 Da**

**Expected mass (modified) 14686.6 Da**

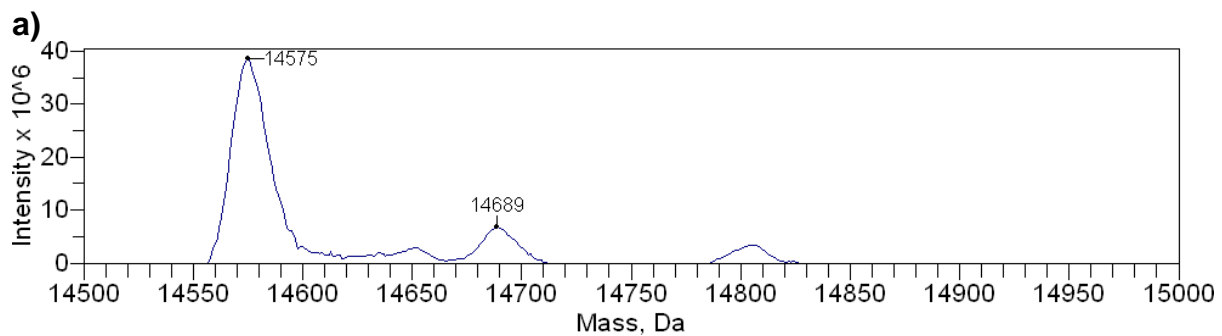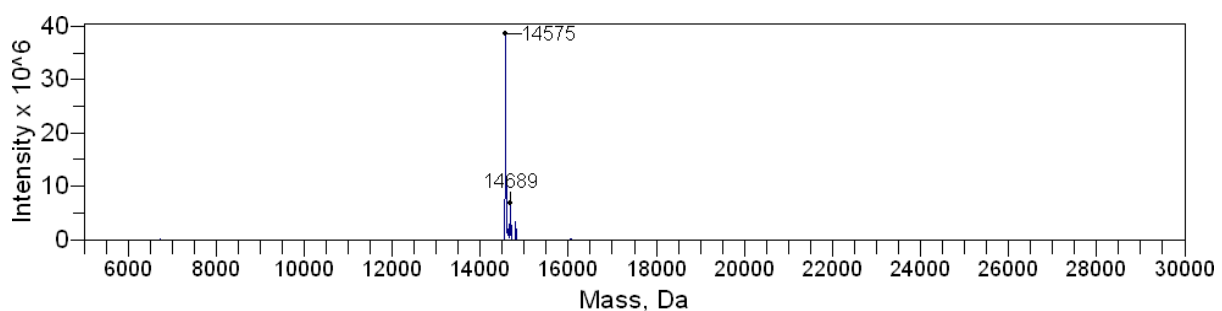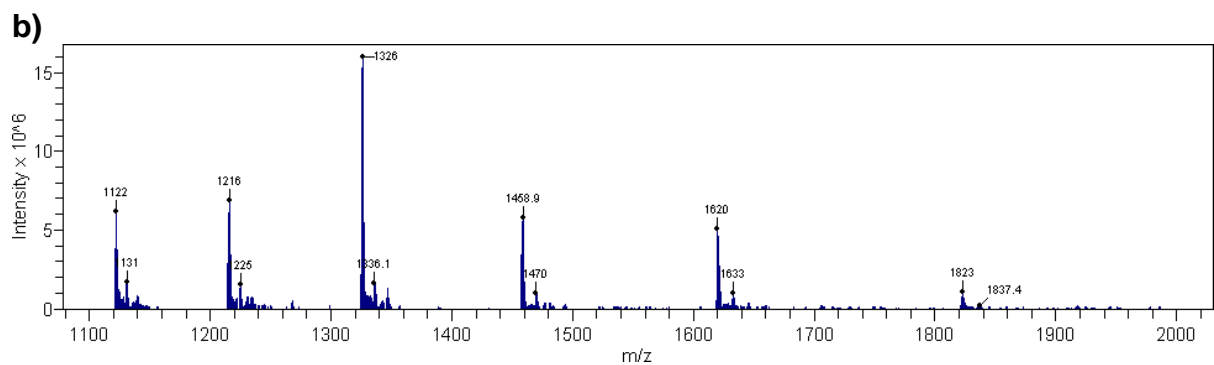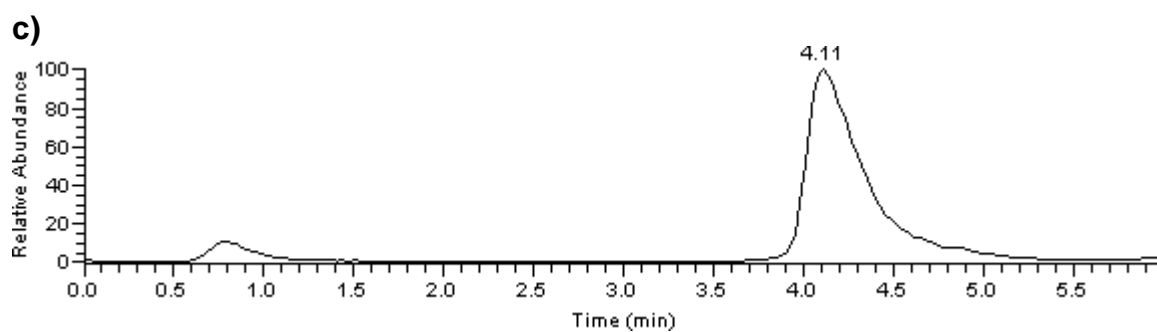

(a) deconvoluted, (b) non-deconvoluted, and (c) TIC mass spectrometry data for HER2DARPin(K68C) reacted with BrAcEGMe.

**Supplementary Figure 30. HER2DARPin(K68C) with 1 mM NMM, 1 mM EDTA, in PBS pH 7.4, 10% DMF, 1 h, at 4 °C.**

**Expected mass (unmodified) 14571.4 Da**

**Expected mass (modified) 14682.5 Da**

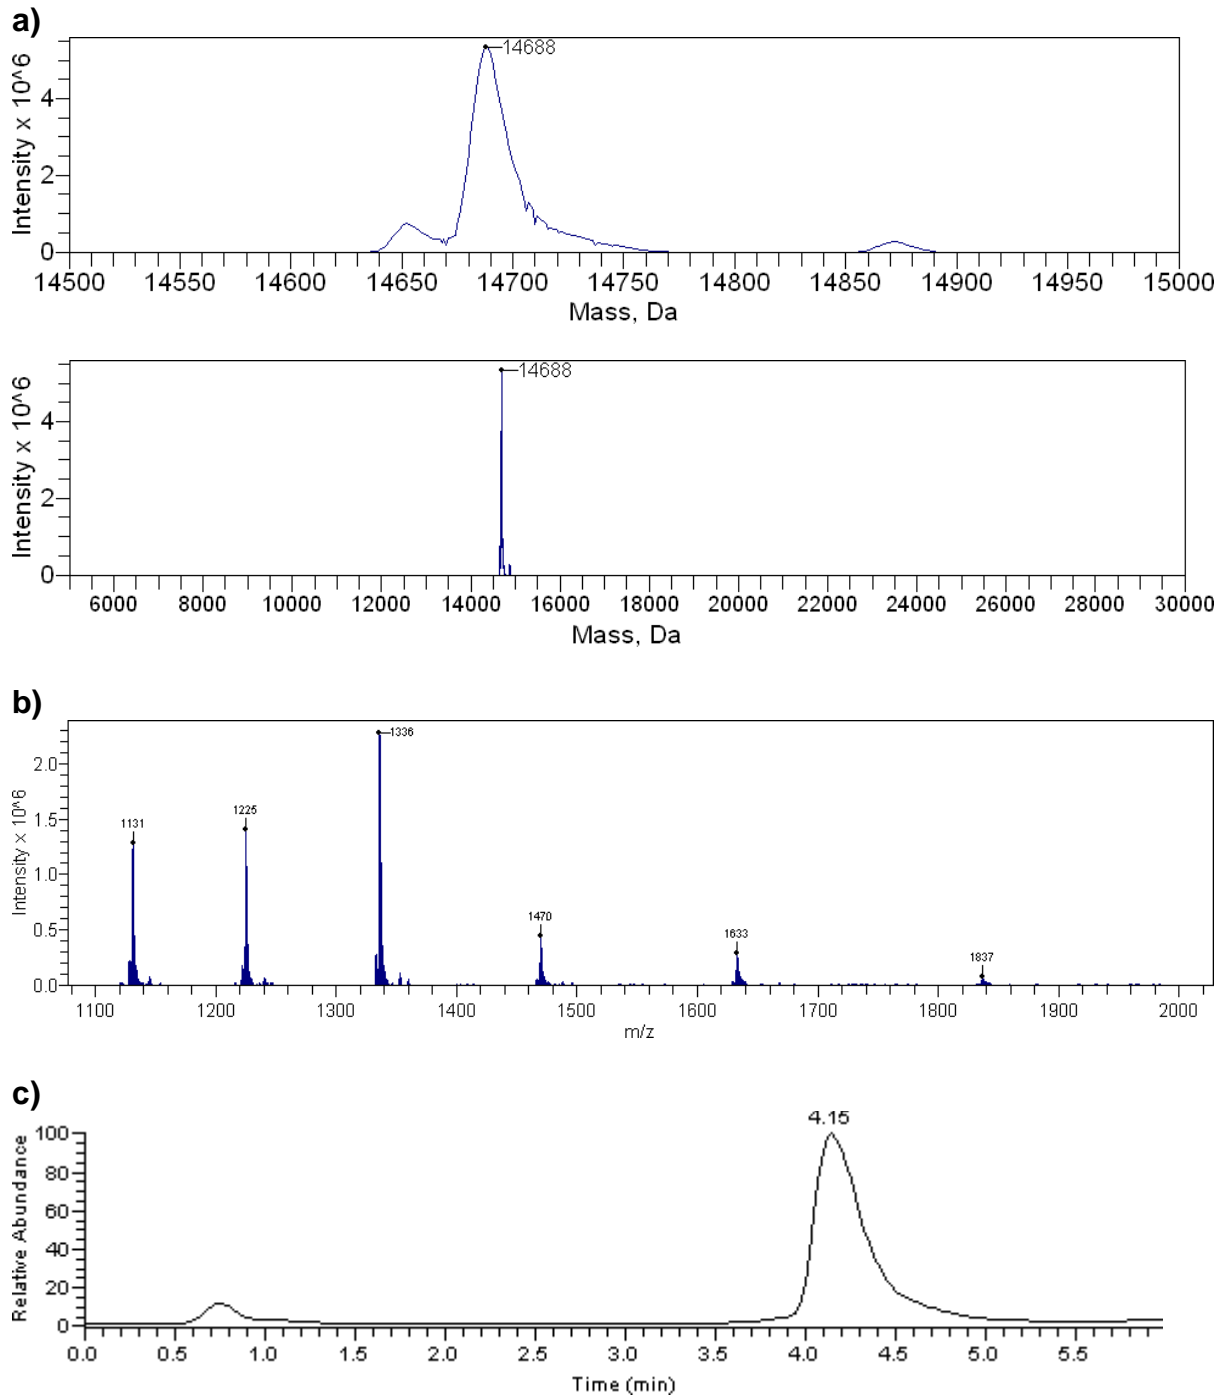

(a) deconvoluted, (b) non-deconvoluted, and (c) TIC mass spectrometry data for HER2DARPin(K68C) reacted with NMM.

**Supplementary Figure 31. HER2DARPin(N69C) in PBS, 1 mM EDTA.**  
**Expected mass 14585.4 Da**

**Sequence**

MRGSHHHHHHGS~~D~~LGKKLLEAARAGQDDEVRI~~L~~MAN~~G~~ADVNAKDEYGLTPLYLATAHGHLEI  
VEVLLK~~C~~GADVNAVDAIGFTPLHLAAFIGHLEIAEVLLKHGADVNAQDKFGKTA~~F~~DISIGNG  
NEDLAEILQKLN

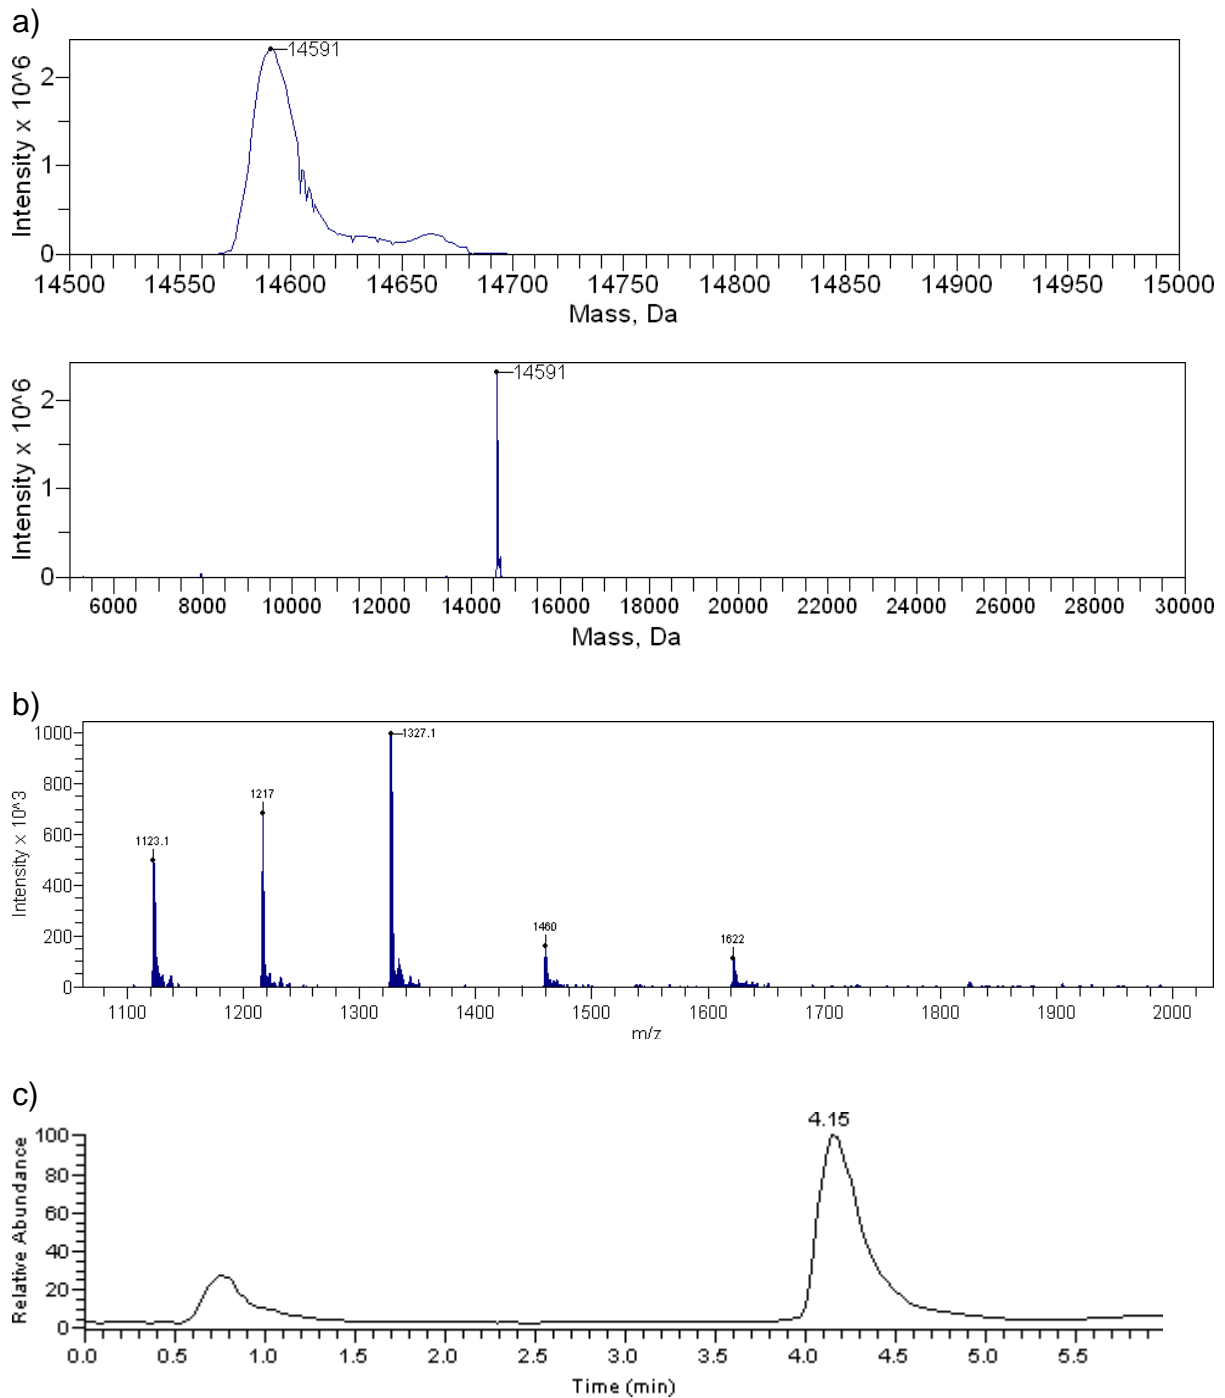

(a) deconvoluted, (b) non-deconvoluted, and (c) TIC mass spectrometry data for HER2DARPin(N69C).

**Supplementary Figure 32. HER2DARPin(N69C) with 1 mM BrAcEGMe, 1 mM EDTA, in PBS pH 7.4, 10% DMF, 2 h, at 4 °C.**

**Expected mass (unmodified) 14585.4 Da**

**Expected mass (modified) 14700.6 Da**

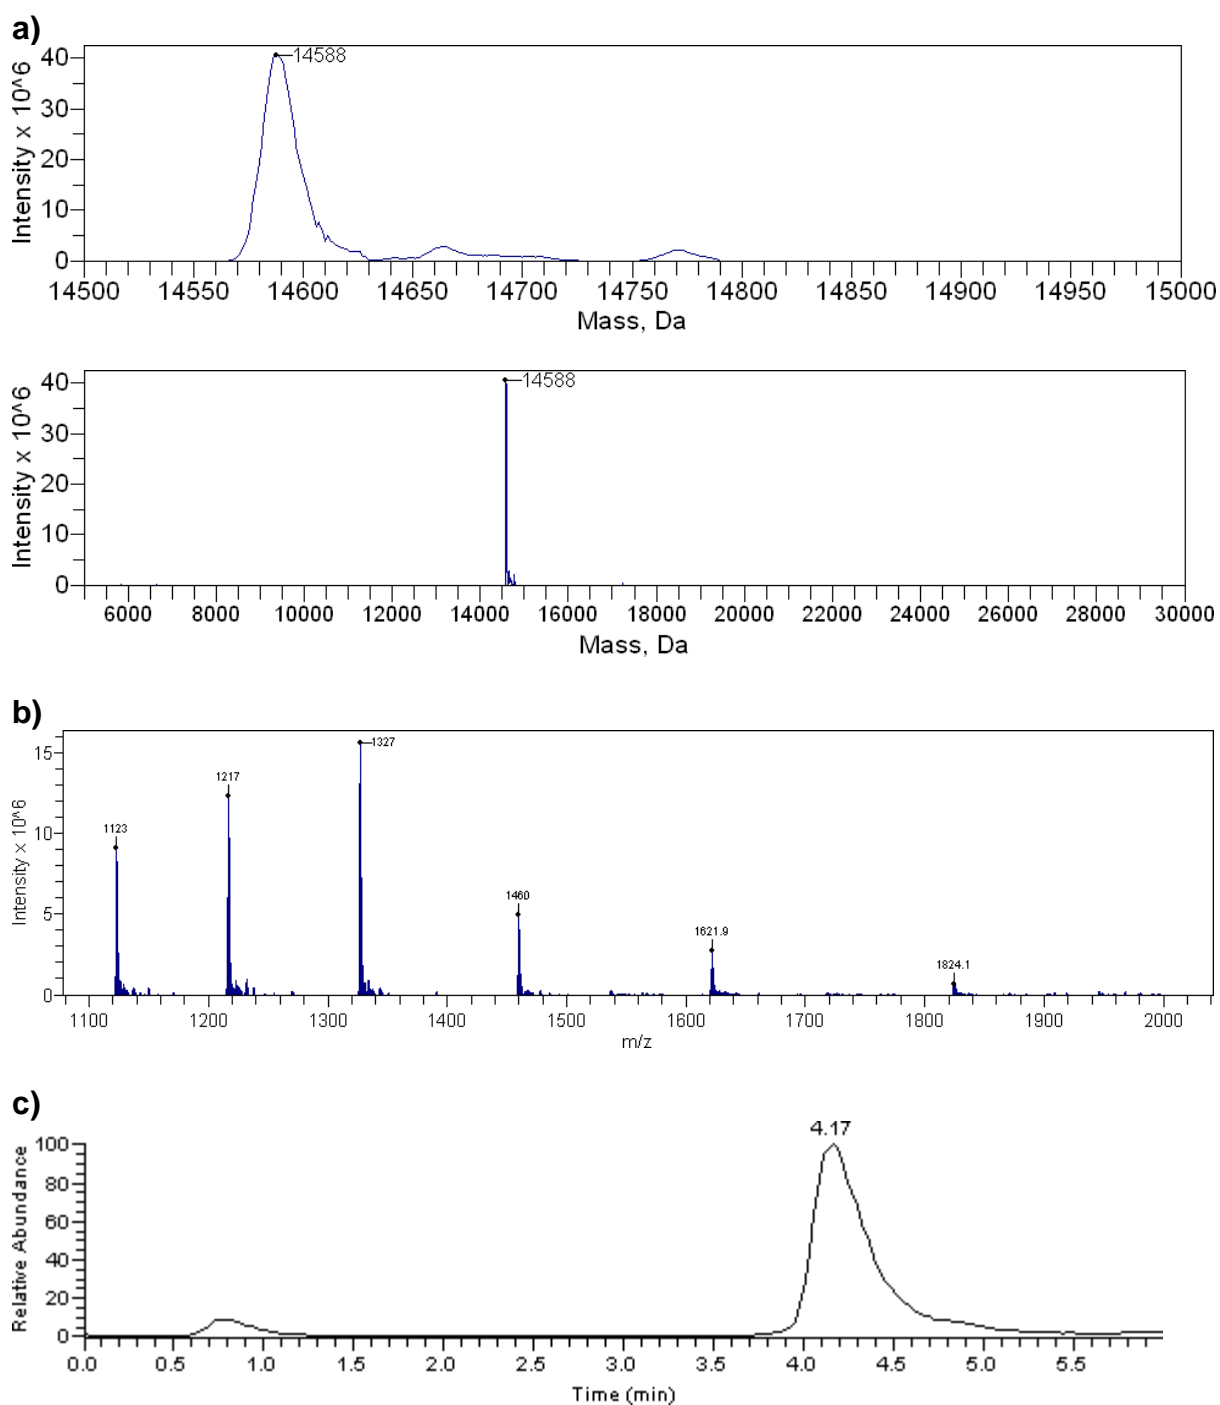

(a) deconvoluted, (b) non-deconvoluted, and (c) TIC mass spectrometry data for HER2DARPin(N69C) reacted with BrAcEGMe.

**Supplementary Figure 33. HER2DARPin(N69C) with 1 mM NMM, 1 mM EDTA, in PBS pH 7.4, 10% DMF, 1 h, at 4 °C.**

**Expected mass (unmodified) 14585.4 Da**

**Expected mass (modified) 14696.5 Da**

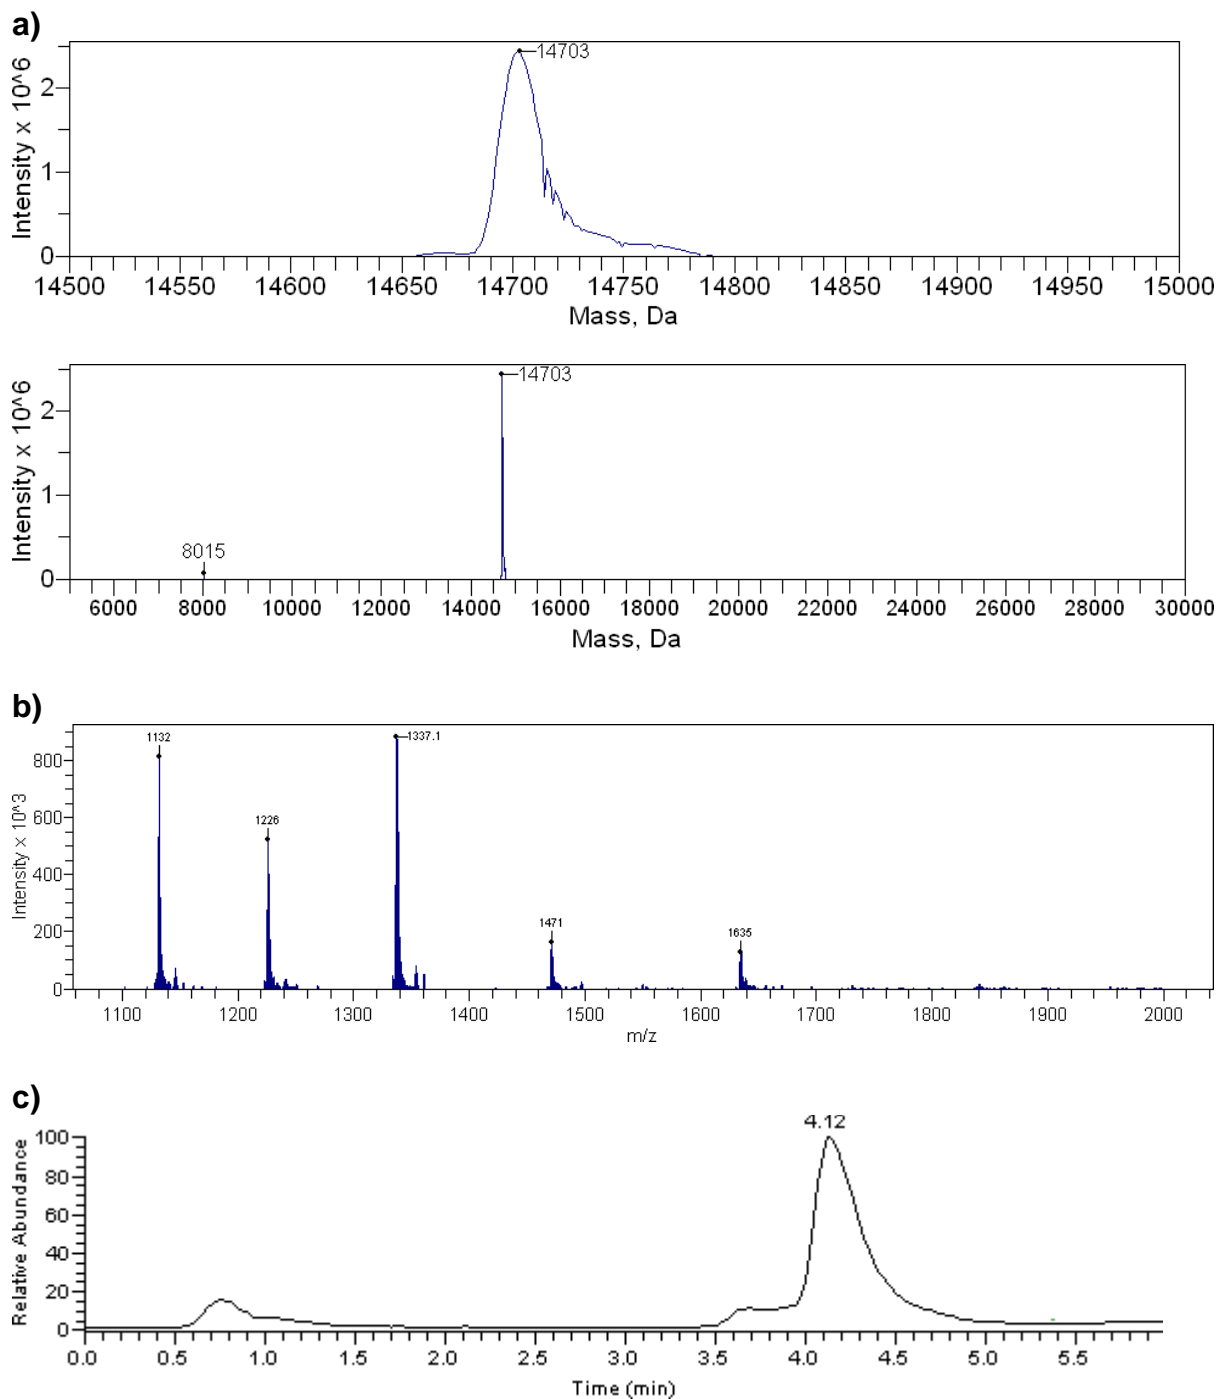

(a) deconvoluted, (b) non-deconvoluted, and (c) TIC mass spectrometry data for HER2DARPin(N69C) reacted with NMM.

**Supplementary Figure 34. HER2DARPin(G70C) in PBS, 1 mM EDTA.**  
**Expected mass 14642.5 Da**

**Sequence**

MRGSHHHHHHGS~~D~~LGKKLL~~E~~AARAGQDDEVRI~~L~~MAN~~G~~ADVNAKDEYGLTPLYLATAHGHLEI  
VEVLLKN~~C~~ADVNAVDAIGFTPLHLAAFIGHLEIAEVLLKHGADVNAQDKFGKTAFDISIGNG  
NEDLAEILQKLN

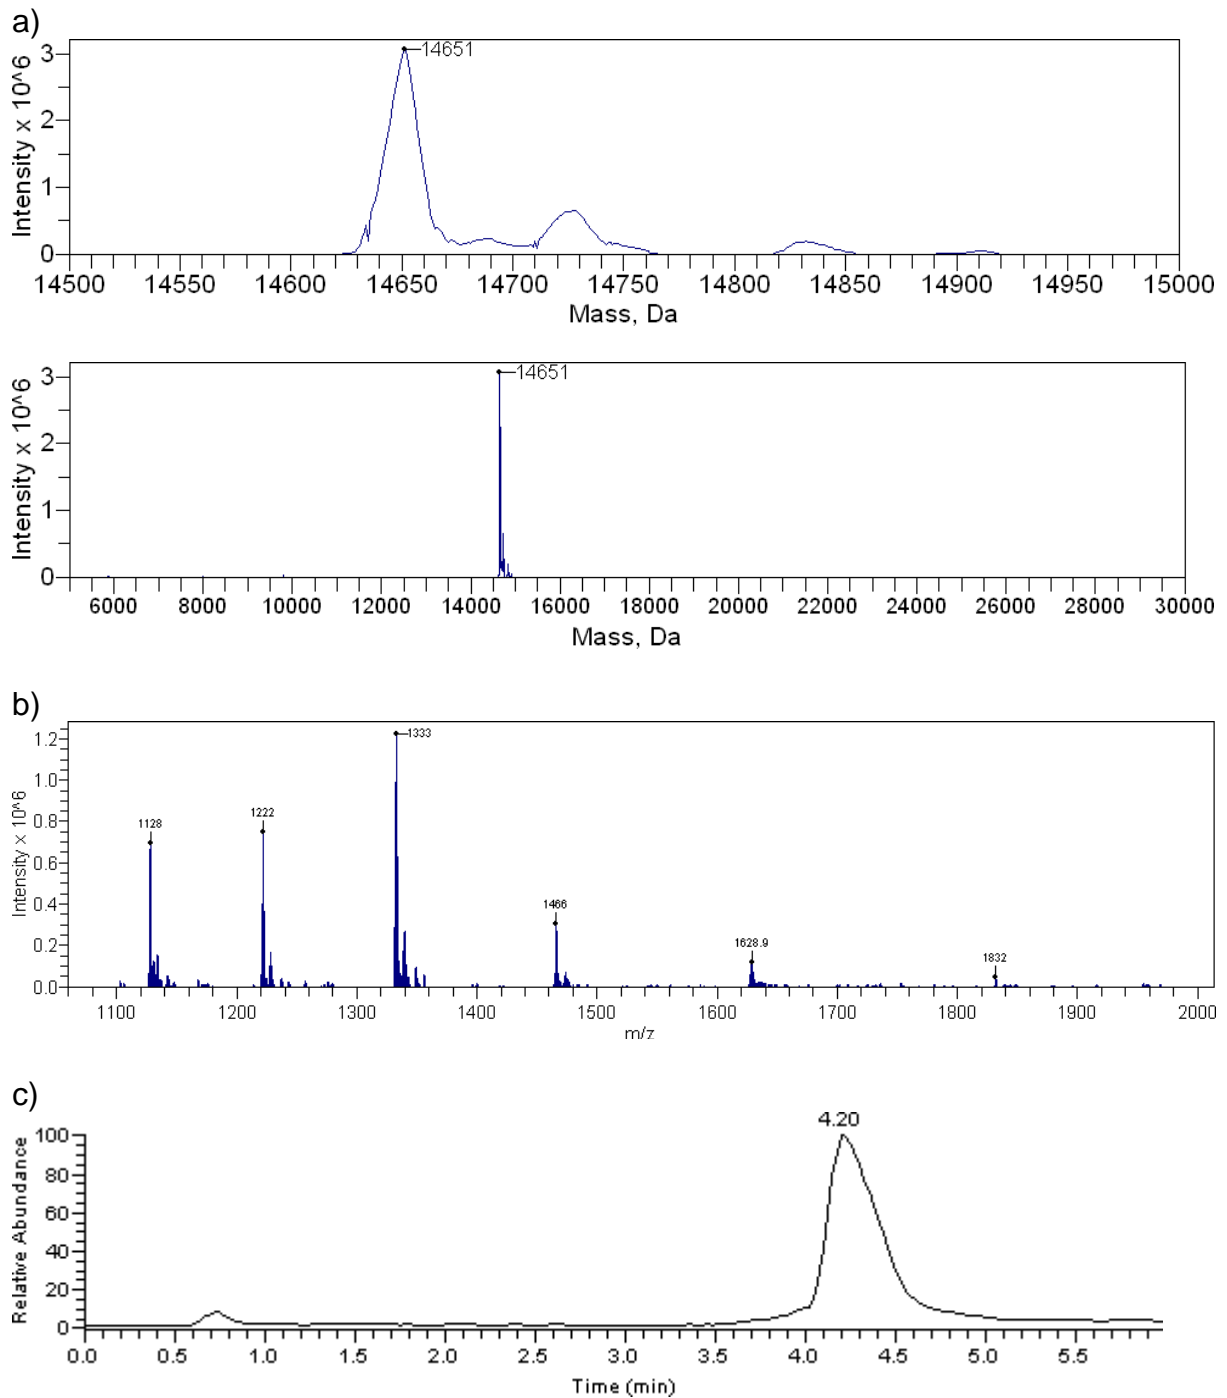

(a) deconvoluted, (b) non-deconvoluted, and (c) TIC mass spectrometry data for HER2DARPin(G70C).

**Supplementary Figure 35. HER2DARPin(G70C) with 1 mM BrAcEGMe, 1 mM EDTA, in PBS pH 7.4, 10% DMF, 2 h, at 4 °C.**  
**Expected mass (unmodified) 14642.4 Da**  
**Expected mass (modified) 14757.6 Da**

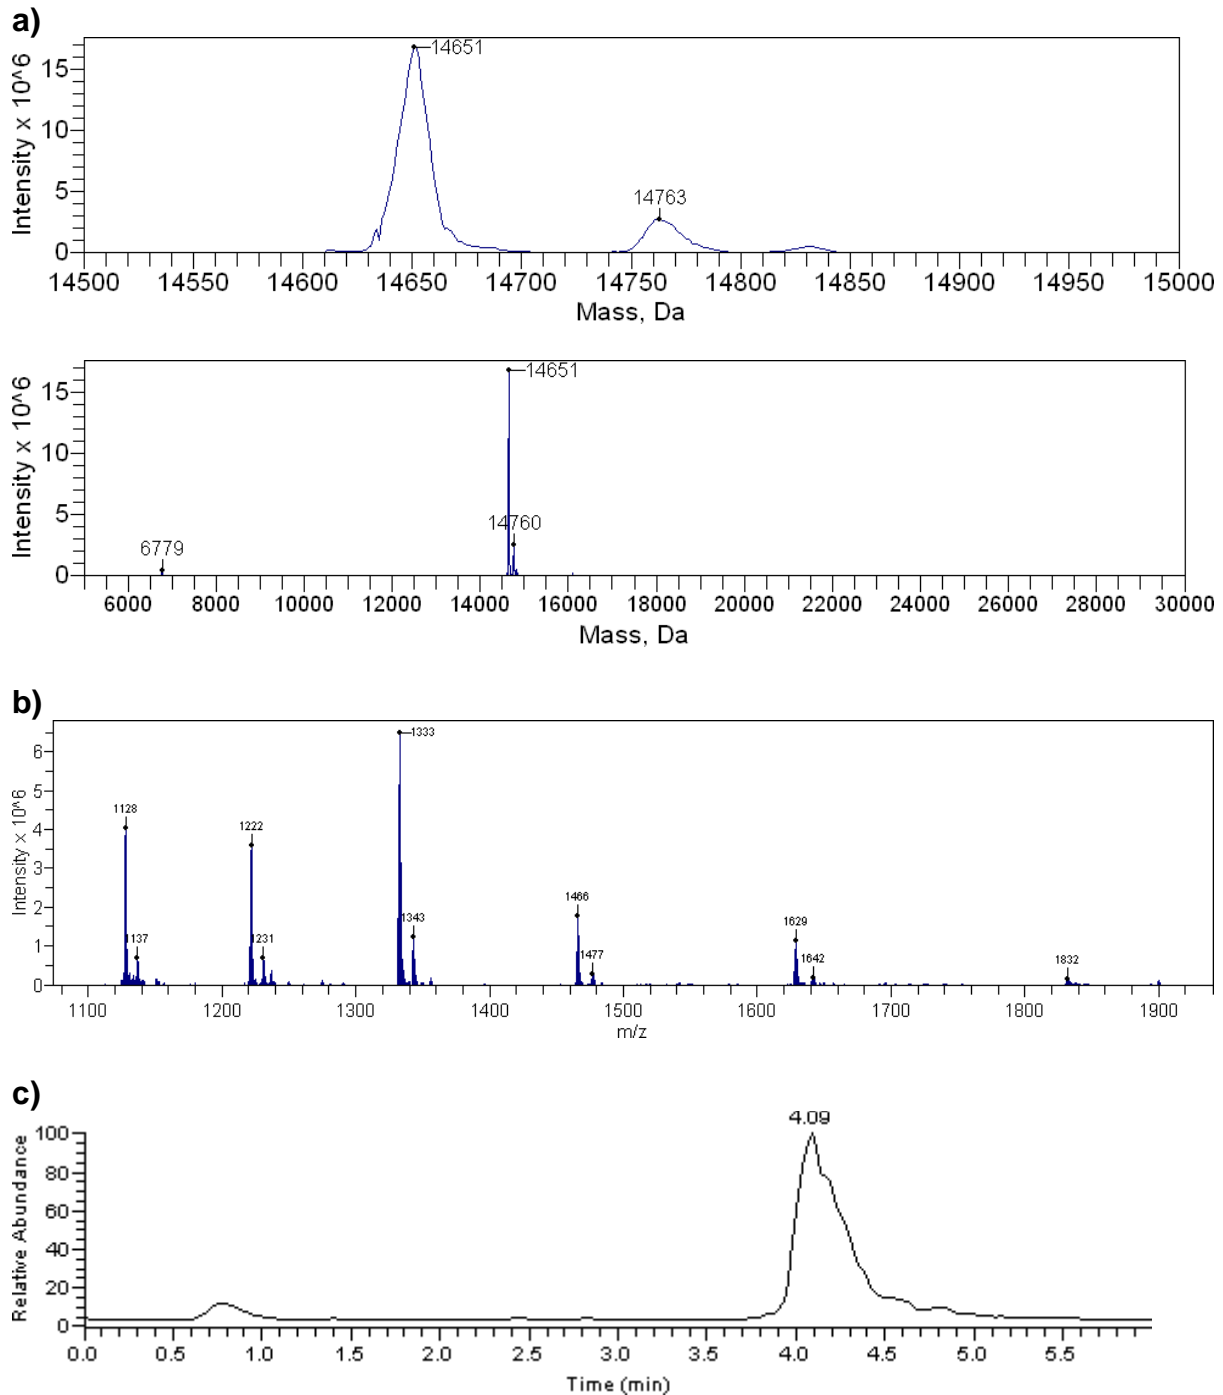

(a) deconvoluted, (b) non-deconvoluted, and (c) TIC mass spectrometry data for HER2DARPin(G70C) reacted with BrAcEGMe.



**Supplementary Figure 36. HER2DARPin(G70C) with 1 mM NMM, in PBS, 1 mM EDTA, pH 7.4, 10% DMF, 1 h, at 4 °C.**

**Expected mass (unmodified) 14642.4 Da**

**Expected mass (modified) 14753.5 Da**

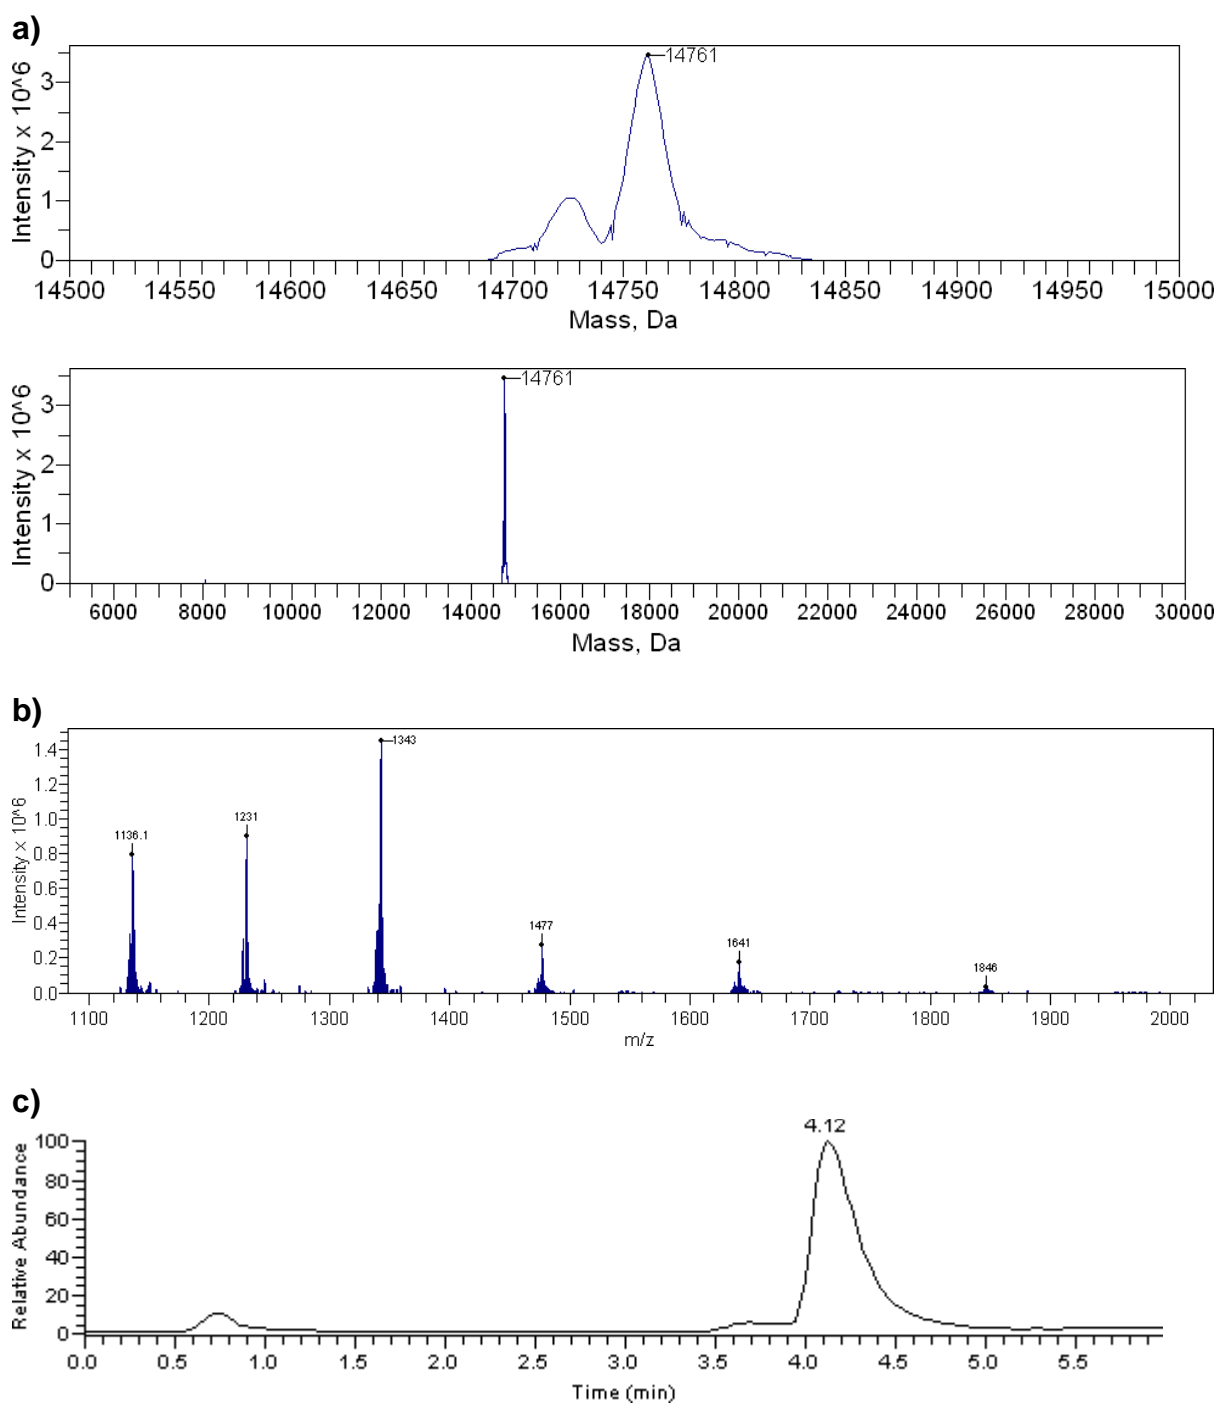

(a) deconvoluted, (b) non-deconvoluted, and (c) TIC mass spectrometry data for HER2DARPin(G70C) reacted with NMM.

**Supplementary Figure 37. HER2DARPin(D72C) in PBS, 1 mM EDTA.**  
**Expected mass 14584.4 Da**

**Sequence**

MRGSHHHHHHGS~~D~~LGKKLLEAARAGQDDEVRI~~L~~MANGADVNAKDEYGLTPLYLATAHGHLEI  
VEVLLKNGA~~C~~VNAVDAIGFTPLHLAAFIGHLEIAEVLLKHGADVNAQDKFGKTA~~F~~DISIGNG  
NEDLAEILQKLN

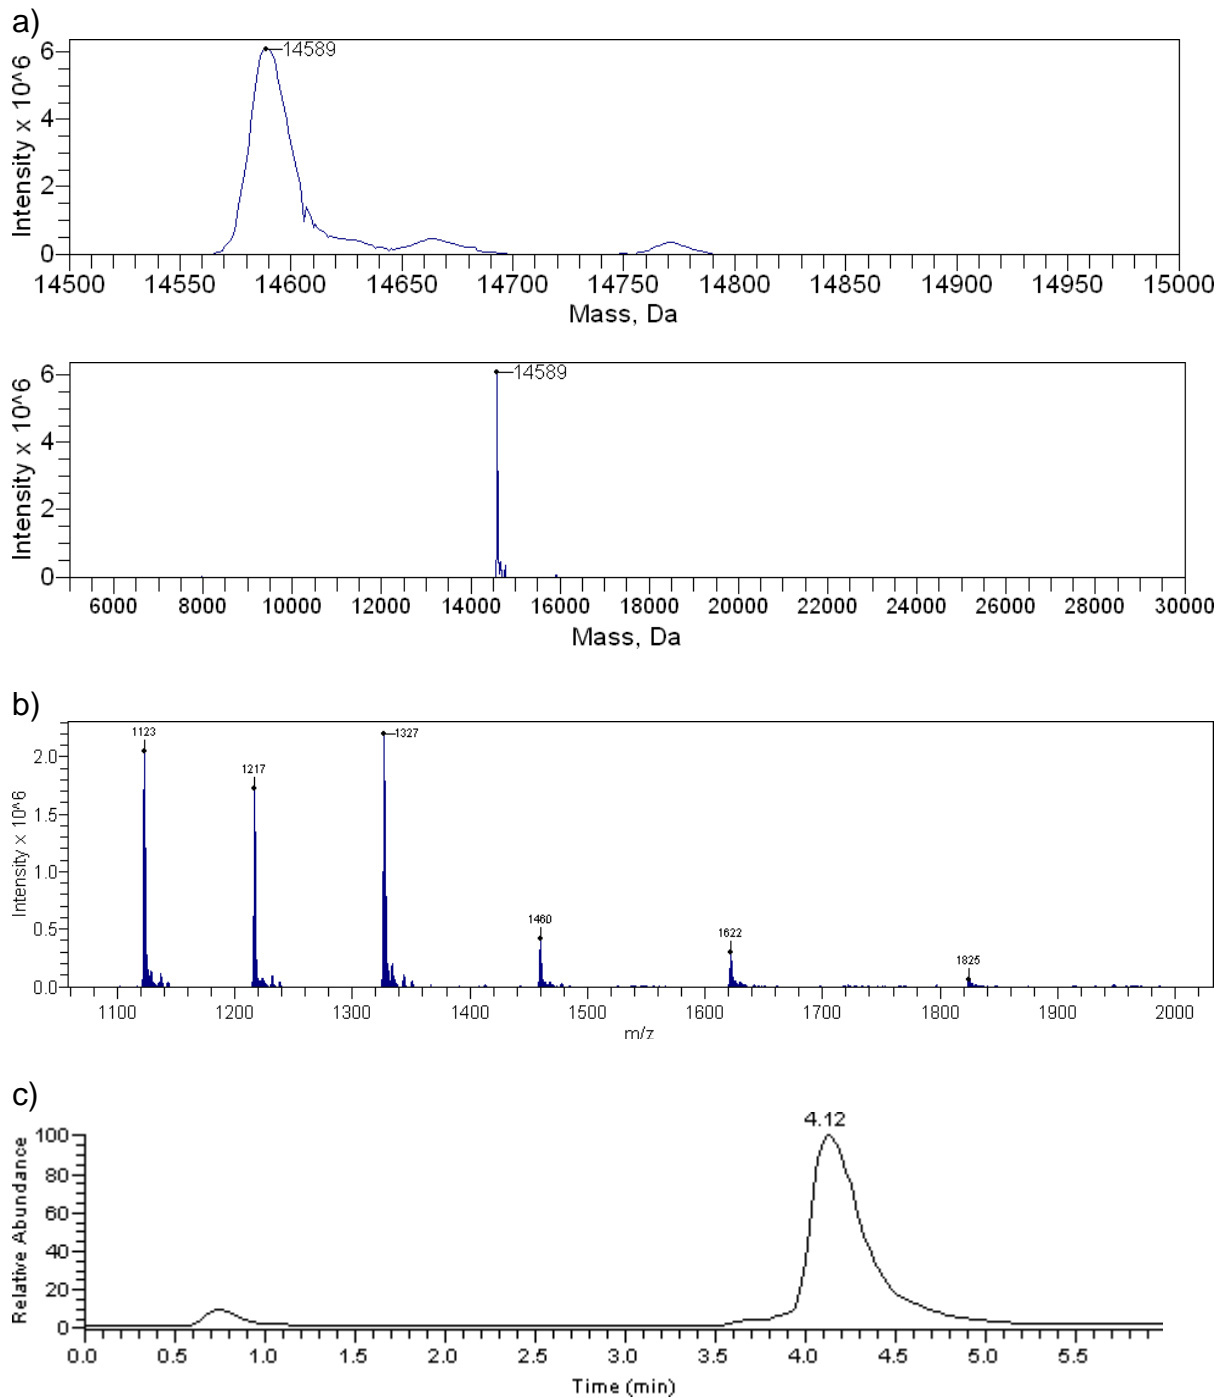

(a) deconvoluted, (b) non-deconvoluted, and (c) TIC mass spectrometry data for HER2DARPin(D72C).

**Supplementary Figure 38. HER2DARPin(D72C) with 1 mM BrAcEGMe, 1 mM EDTA, in PBS pH 7.4, 10% DMF, 2 h, at 4 °C.**

**Expected mass (unmodified) 14584.4 Da**

**Expected mass (modified) 14699.6 Da**

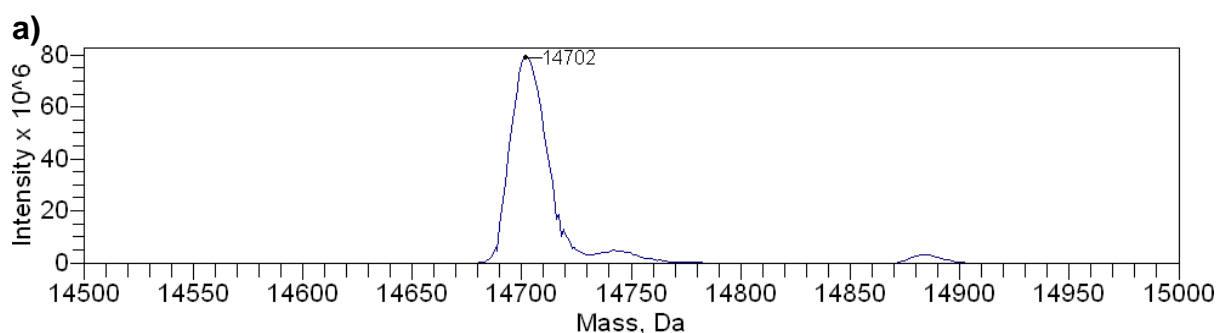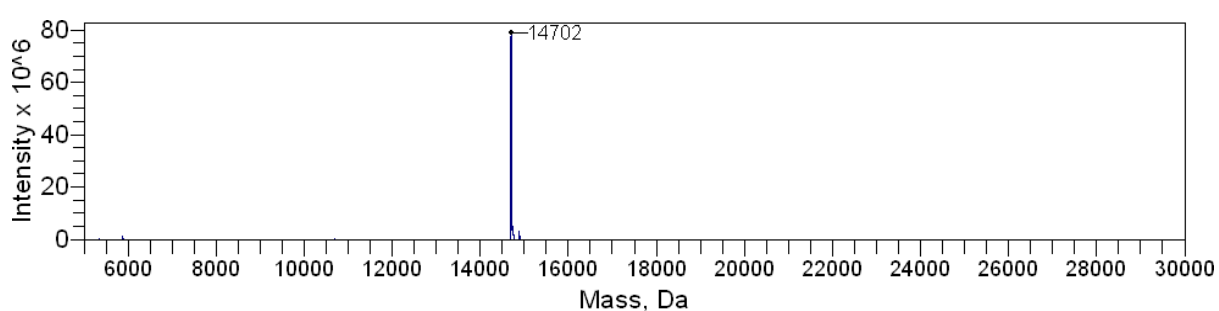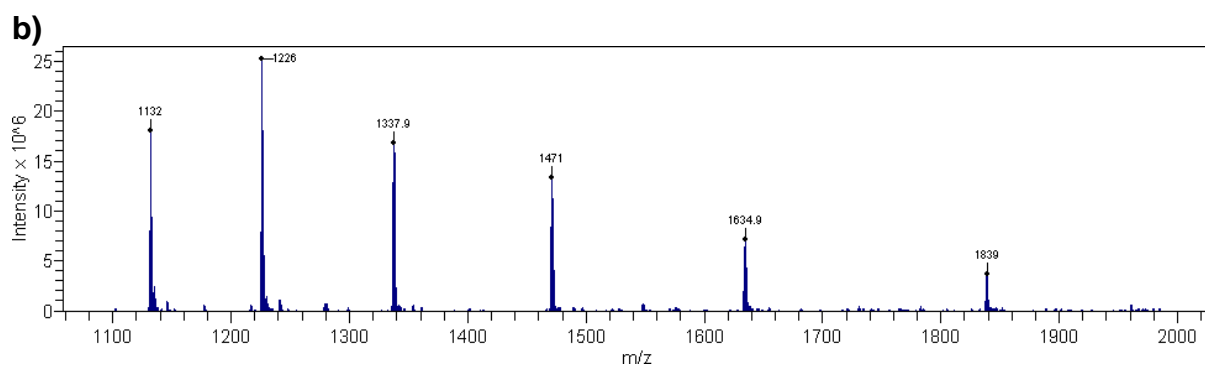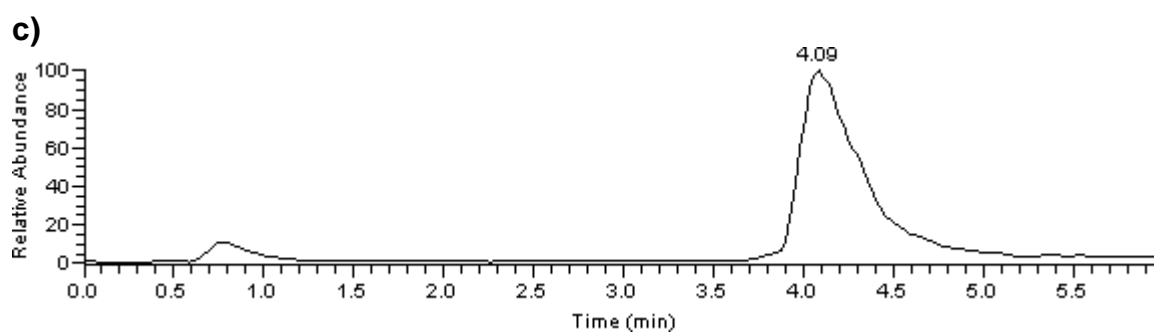

(a) deconvoluted, (b) non-deconvoluted, and (c) TIC mass spectrometry data for HER2DARPin(D72C) reacted with BrAcEGMe.

**Supplementary Figure 39. HER2DARPin(D72C) with 1 mM NMM, 1 mM EDTA, in PBS pH 7.4, 10% DMF, 1 h, at 4 °C.**

**Expected mass (unmodified) 14584.4 Da**

**Expected mass (modified) 14695.5 Da**

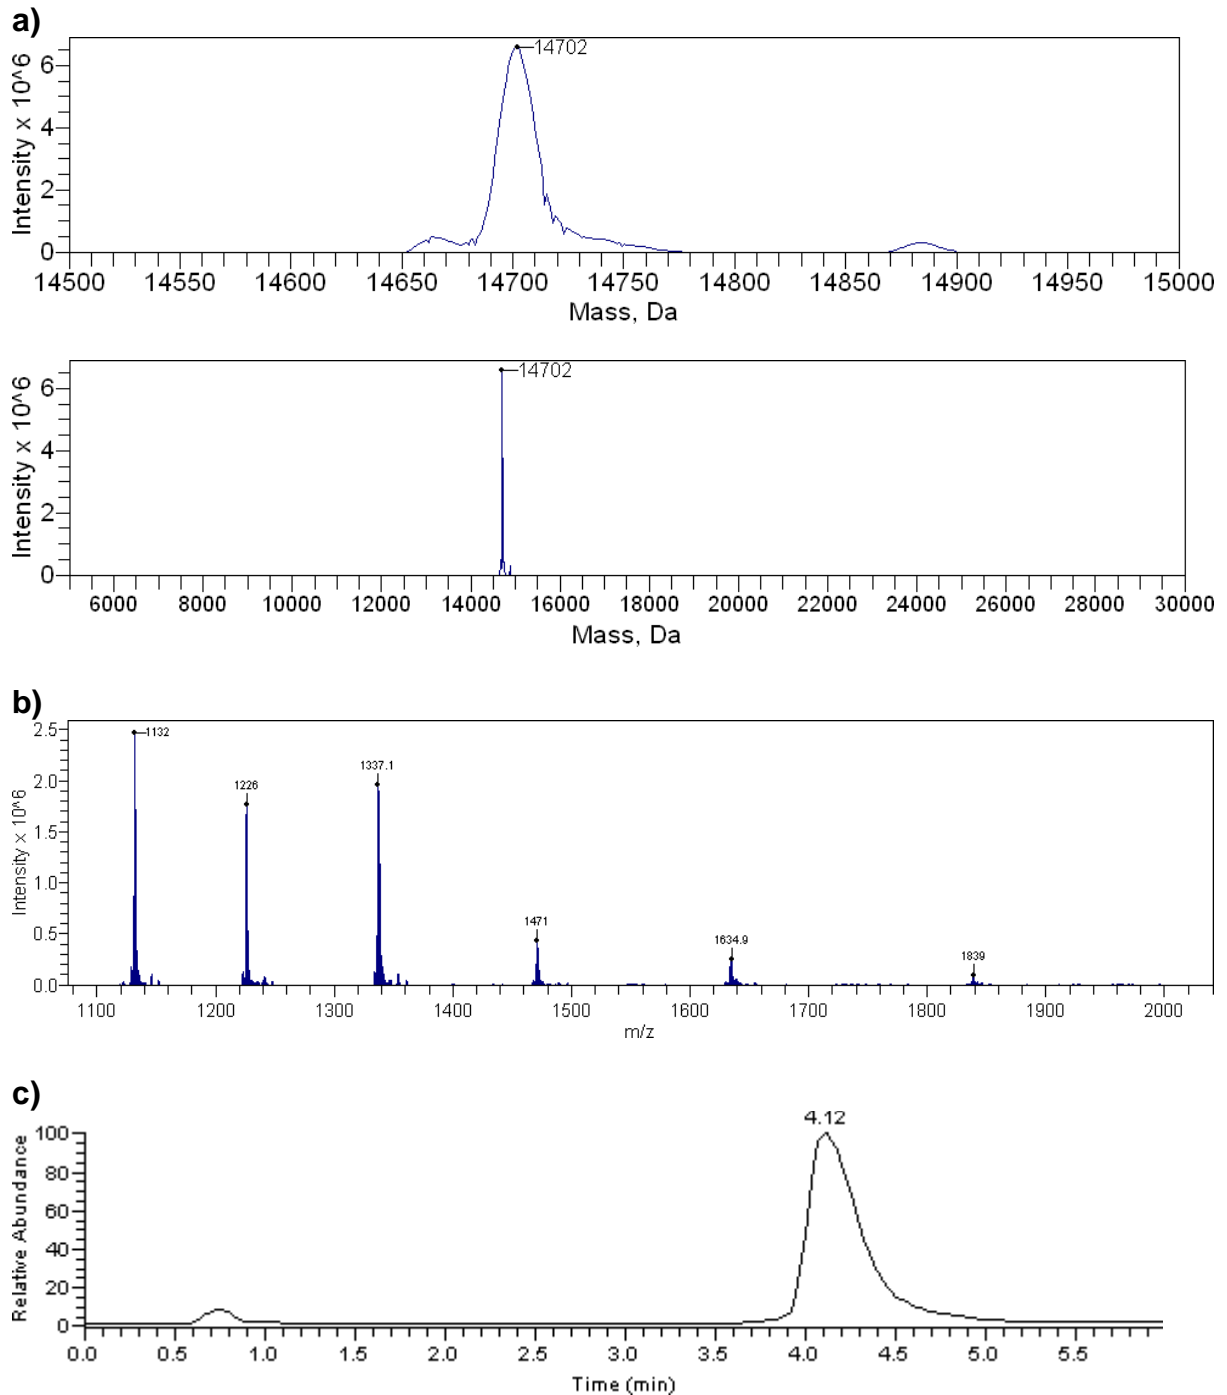

(a) deconvoluted, (b) non-deconvoluted, and (c) TIC mass spectrometry data for HER2DARPin(D72C) reacted with NMM.

**Supplementary Figure 40. HER2DARPin(H102C) in PBS, 1 mM EDTA – Expected mass 14562.4 Da**

**Sequence**

MRGSHHHHHHGS~~DL~~GKKLL~~EA~~ARAGQDDEVRI~~LM~~ANGADVNAKDEYGLTPLYLATAHGHLEI  
VEVLLKNGADVNAVDAIGFTPLHLAAFIGHLEIAEVLLK~~C~~GADVNAQDKFGKTAFDISIGNG  
NEDLAEILQKLN

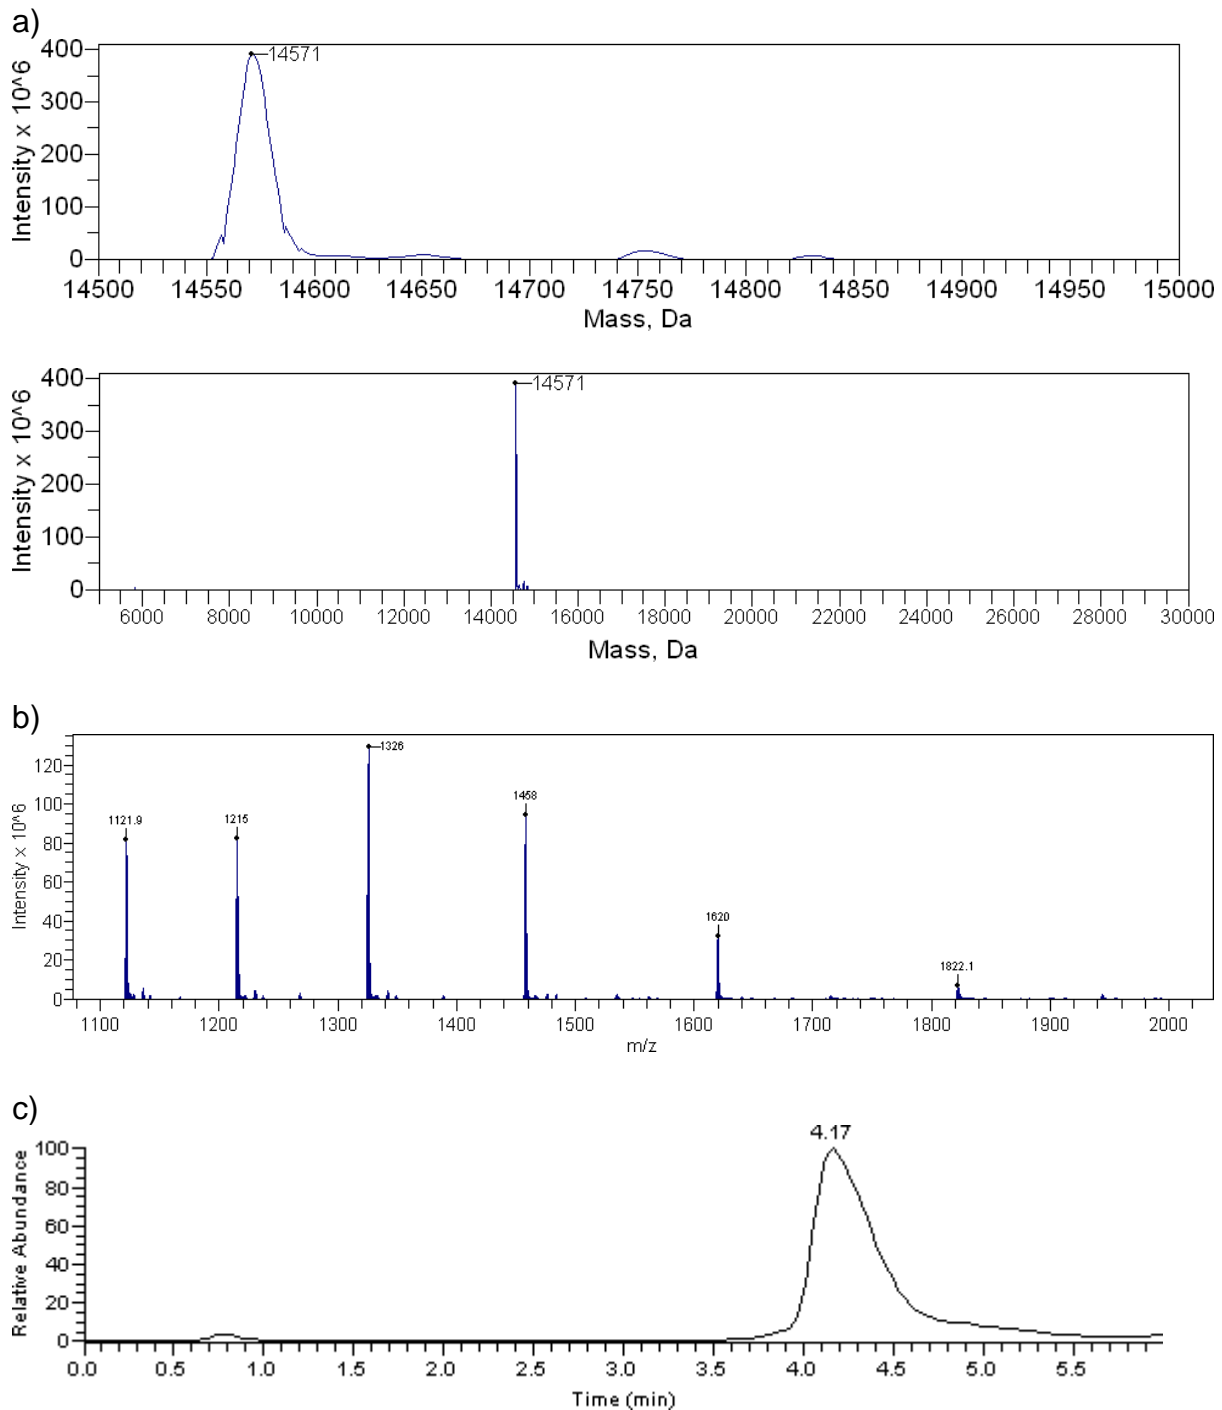

(a) deconvoluted, (b) non-deconvoluted, and (c) TIC mass spectrometry data for HER2DARPin(H102C).

**Supplementary Figure 41. HER2DARPin(H102C) with 1 mM BrAcEGMe, 1 mM EDTA, in PBS pH 7.4, 10% DMF, 2 h, at 4 °C.**

**Expected mass (unmodified) 14562.4 Da**

**Expected mass (modified) 14677.6 Da**

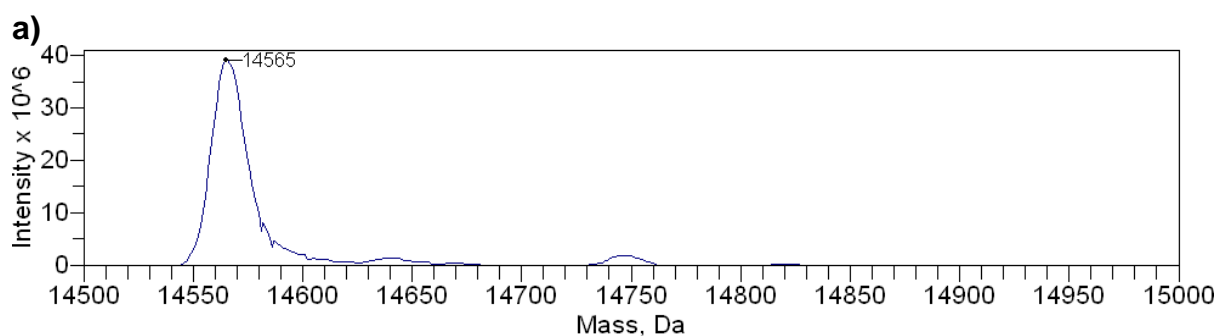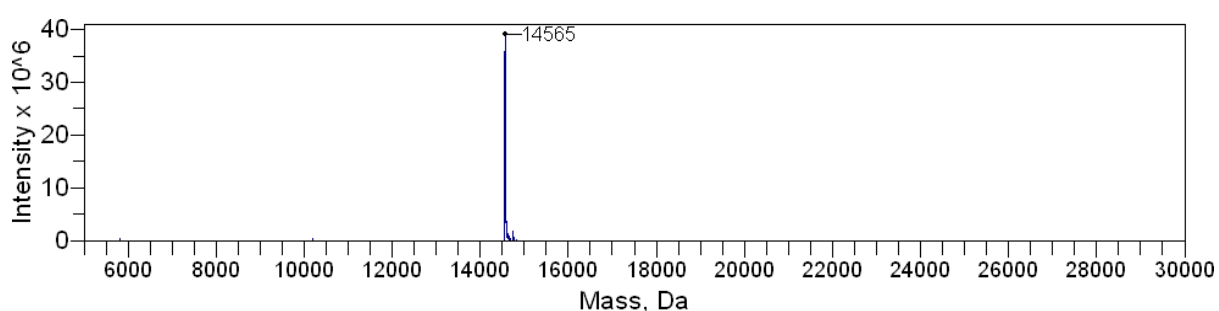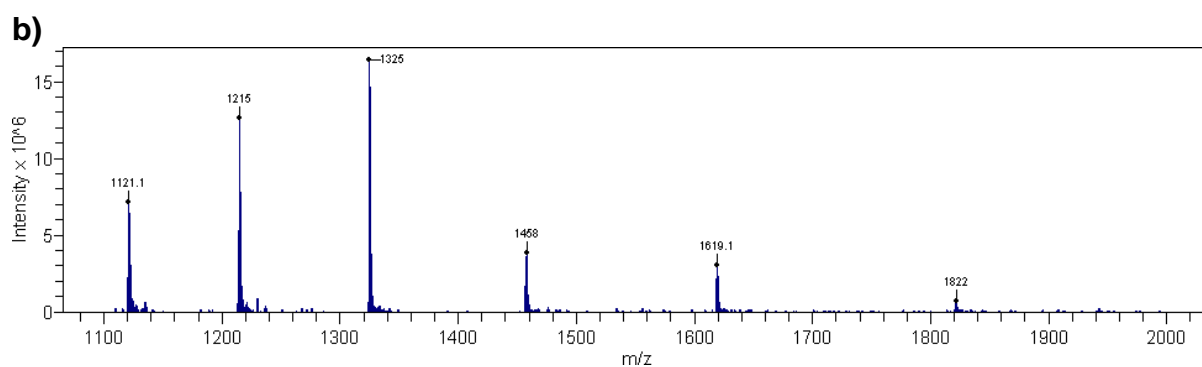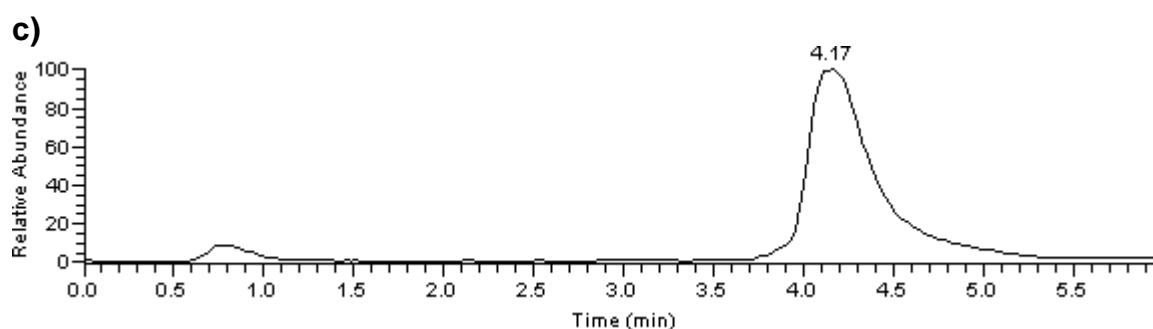

(a) deconvoluted, (b) non-deconvoluted, and (c) TIC mass spectrometry data for HER2DARPin(H102C) reacted with BrAcEGMe.

**Supplementary Figure 42. HER2DARPin(H102C) with 1 mM NMM, 1 mM EDTA, in PBS pH 7.4, 10% DMF, 1 h, at 4 °C.**  
**Expected mass (unmodified) 14562.4 Da**  
**Expected mass (modified) 14673.5 Da**

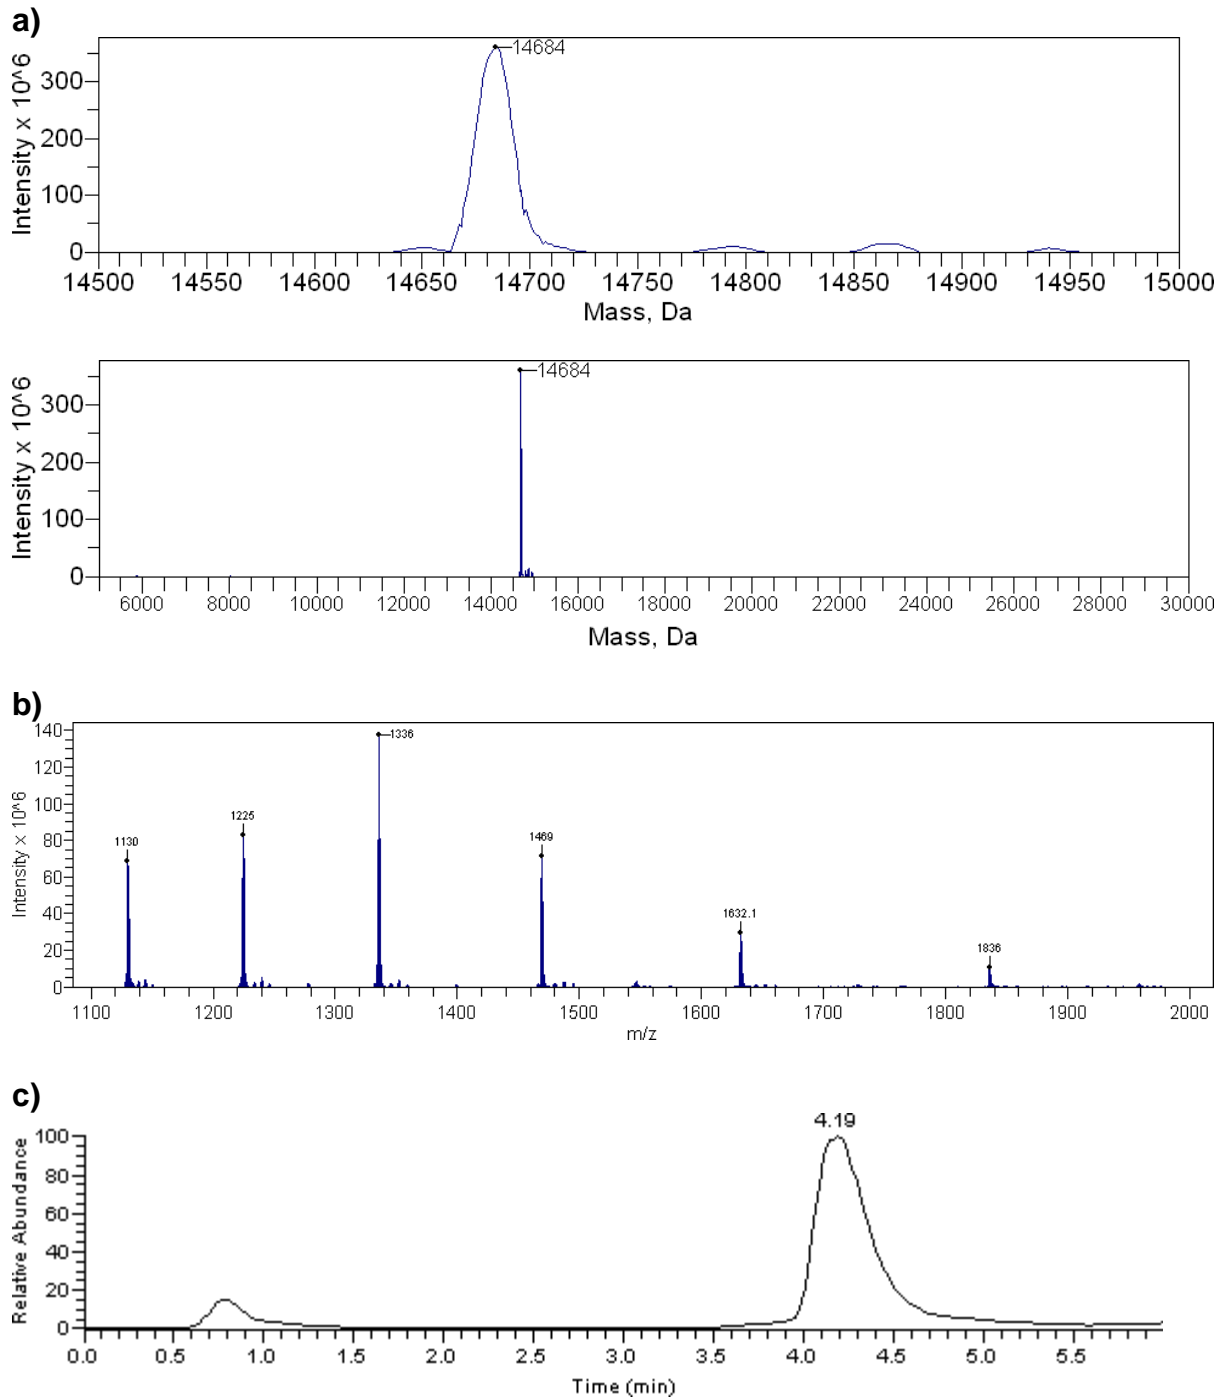

(a) deconvoluted, (b) non-deconvoluted, and (c) TIC mass spectrometry data for HER2DARPin(H102C) reacted with NMM.

**Supplementary Figure 43. HER2DARPin(D105C) in PBS, 1 mM EDTA.**  
**Expected mass 14584.4 Da**

**Sequence**

MRGSHHHHHHGS~~DL~~GKKLLEAARAGQDDEVRI~~LM~~ANGADVNAKDEYGLTPLYLATAHGHLEI  
VEVLLKNGADVNAVDAIGFTPLHLAAFIGHLEIAEVLLKHGACVNAQDKFGKTAFDISIGNG  
NEDLAEILQKLN

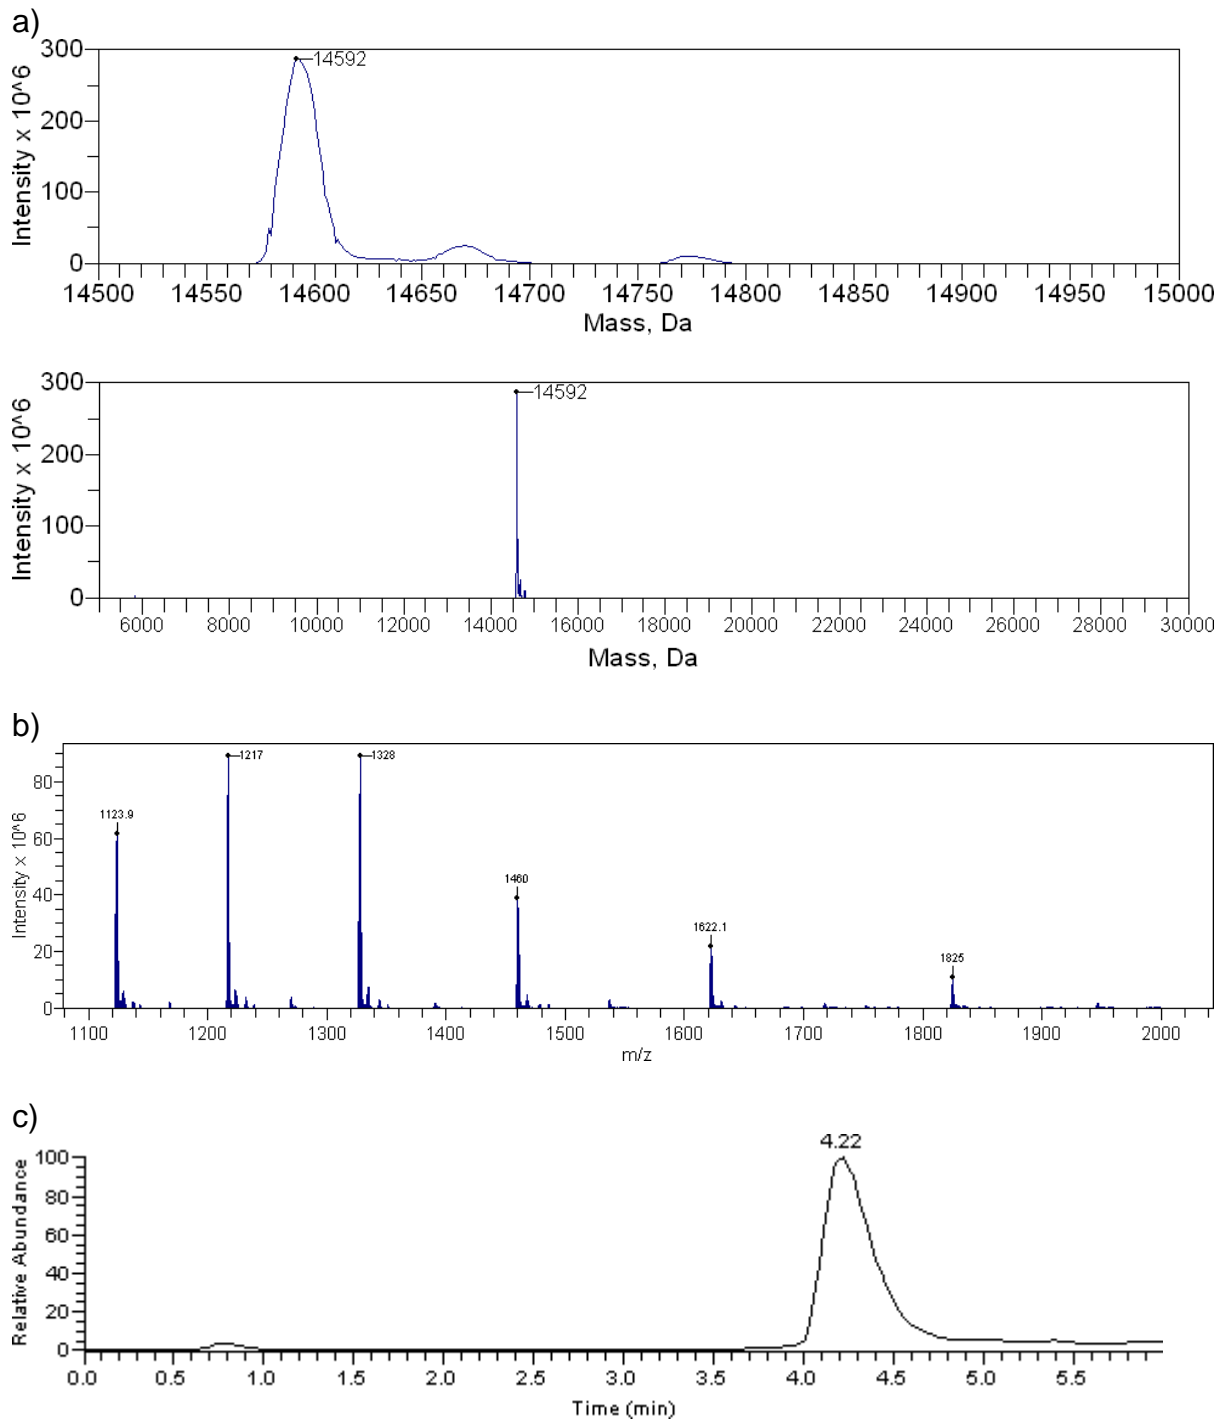

(a) deconvoluted, (b) non-deconvoluted, and (c) TIC mass spectrometry data for HER2DARPin(D105C).



**Supplementary Figure 44. HER2DARPin(D105C) with 1 mM BrAcEGMe, 1 mM EDTA, in PBS pH 7.4, 10% DMF, 2 h, at 4 °C.**

**Expected mass (unmodified) 14584.4 Da**

**Expected mass (modified) 14699.6 Da**

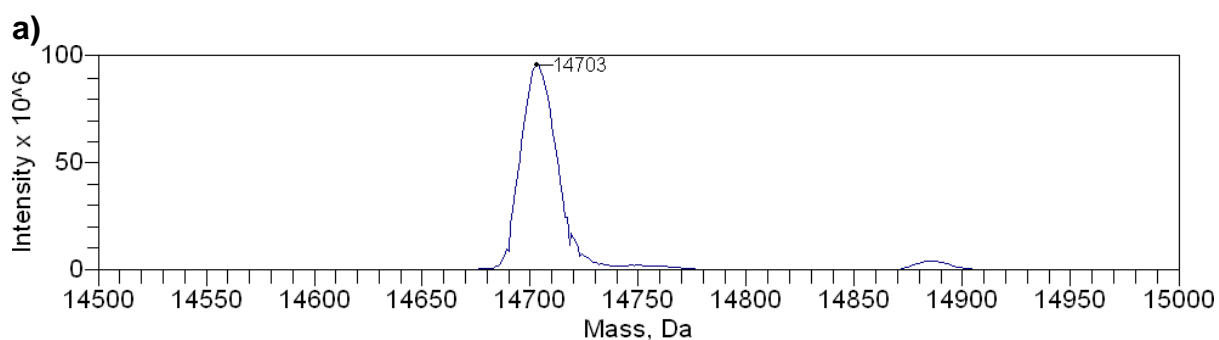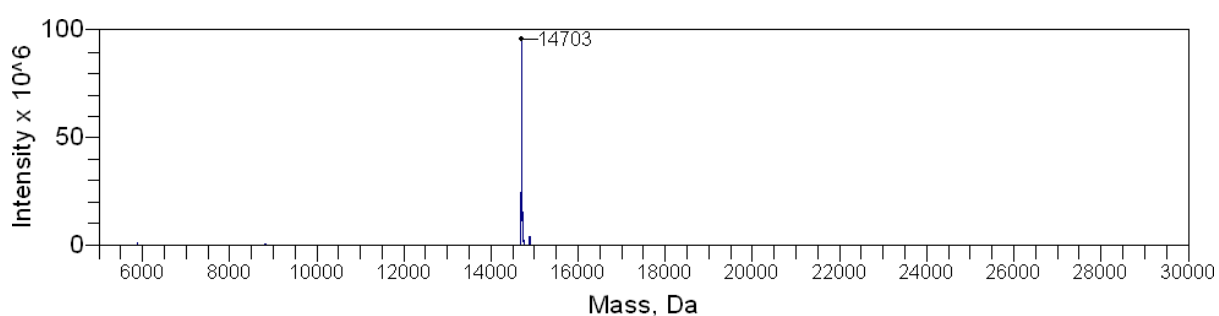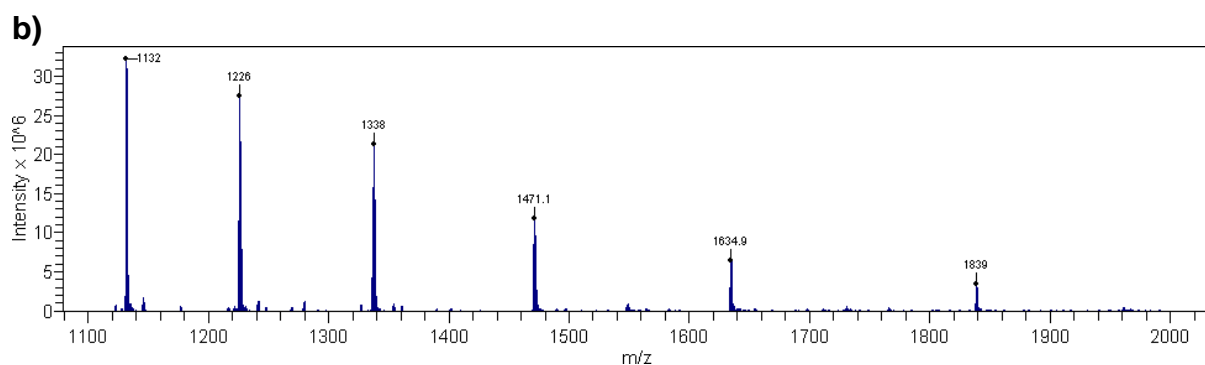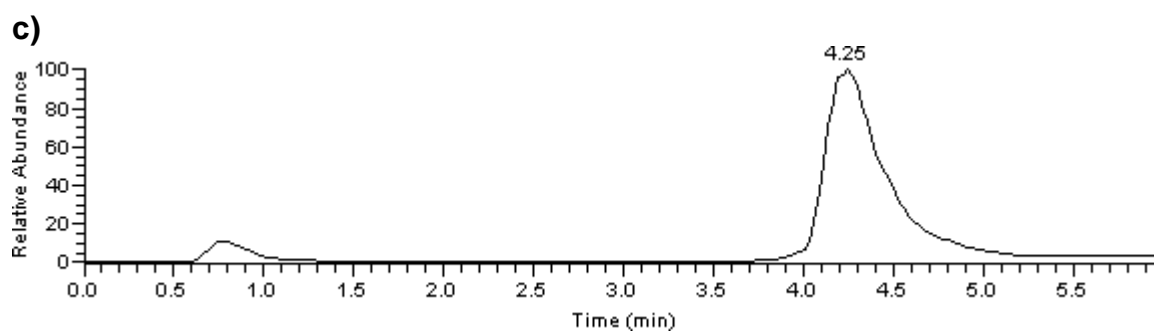

(a) deconvoluted, (b) non-deconvoluted, and (c) TIC mass spectrometry data for HER2DARPin(D105C) reacted with BrAcEGMe.

**Supplementary Figure 45. HER2DARPin(D105C) with 1 mM NMM, 1 mM EDTA, in PBS pH 7.4, 10% DMF, 1 h, at 4 °C.**

**Expected mass (unmodified) 14584.4 Da**

**Expected mass (modified) 14695.5 Da**

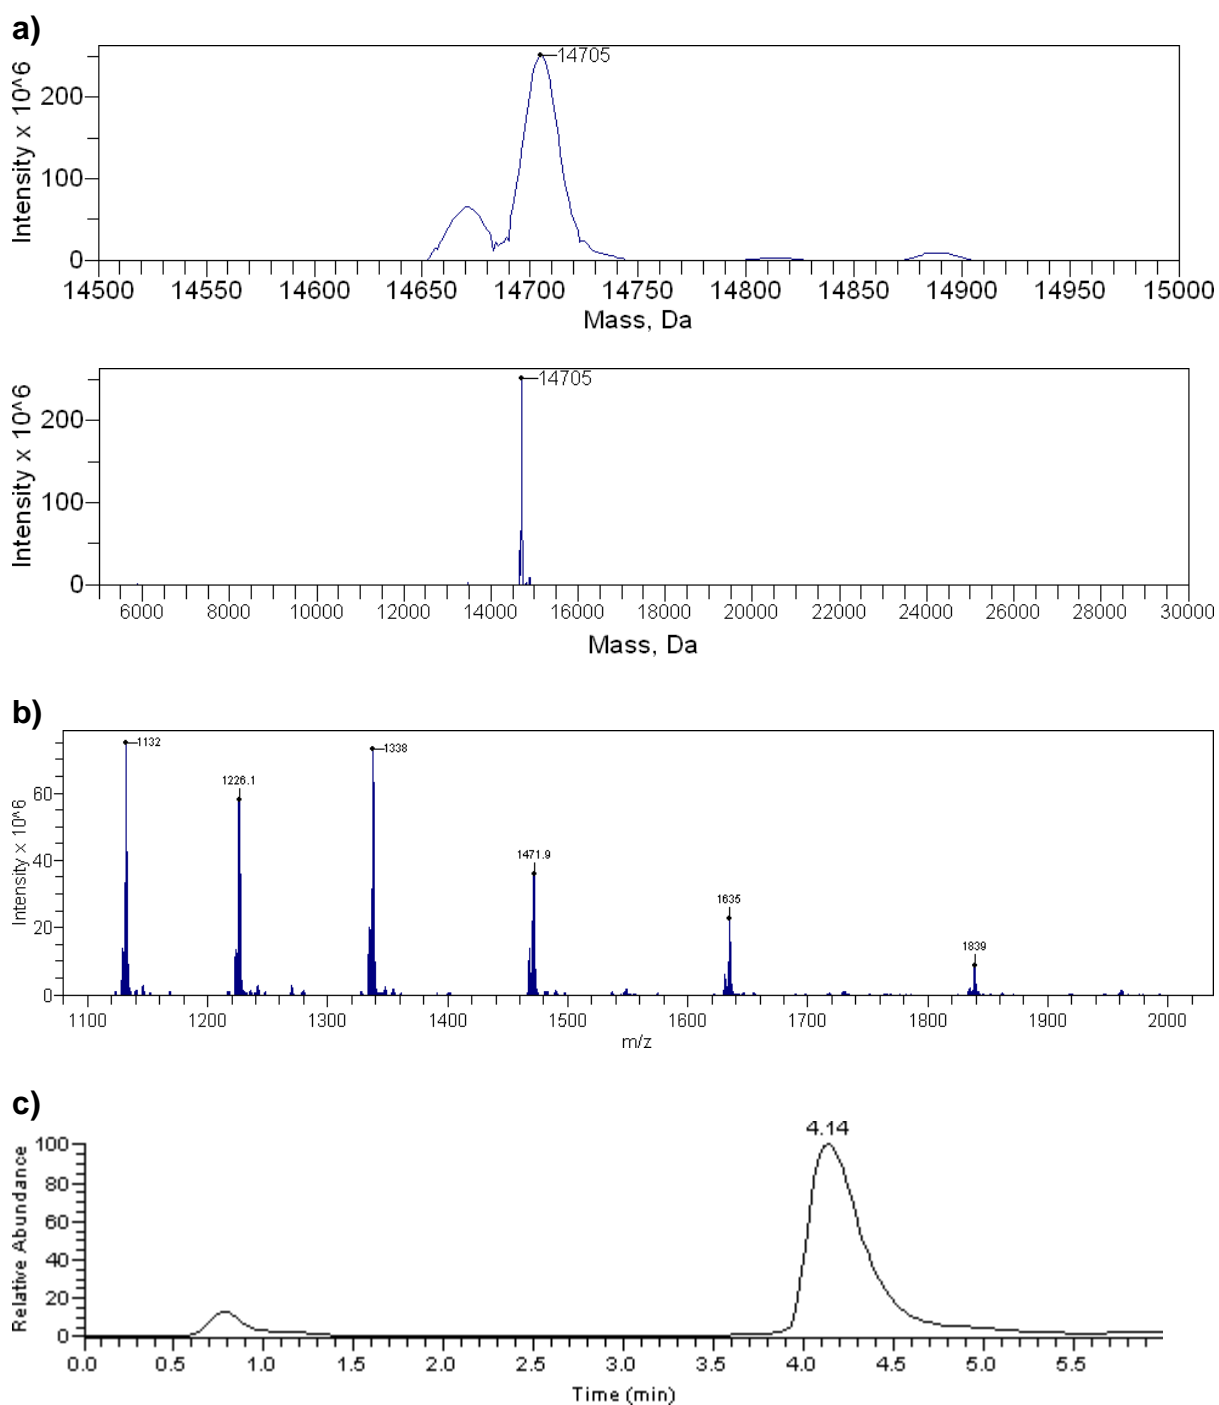

(a) deconvoluted, (b) non-deconvoluted, and (c) TIC mass spectrometry data for HER2DARPin(D105C) reacted with NMM.

**Supplementary Figure 46. HER2DARPin(L135C) in PBS, 1 mM EDTA.**  
**Expected mass 14586.4 Da**

**Sequence**

MRGSHHHHHHGS~~DLGKKLLEA~~ARAGQDDEVRI~~LMANGADV~~NAKDEYGLTPLYLATAHGHLEI  
VEVLLKNGADVNAVDAIGFTPLHLAAFIGHLEIAEVLLKHGADVNAQDKFGKTAFDISIGNG  
NEDLAEILQKCN

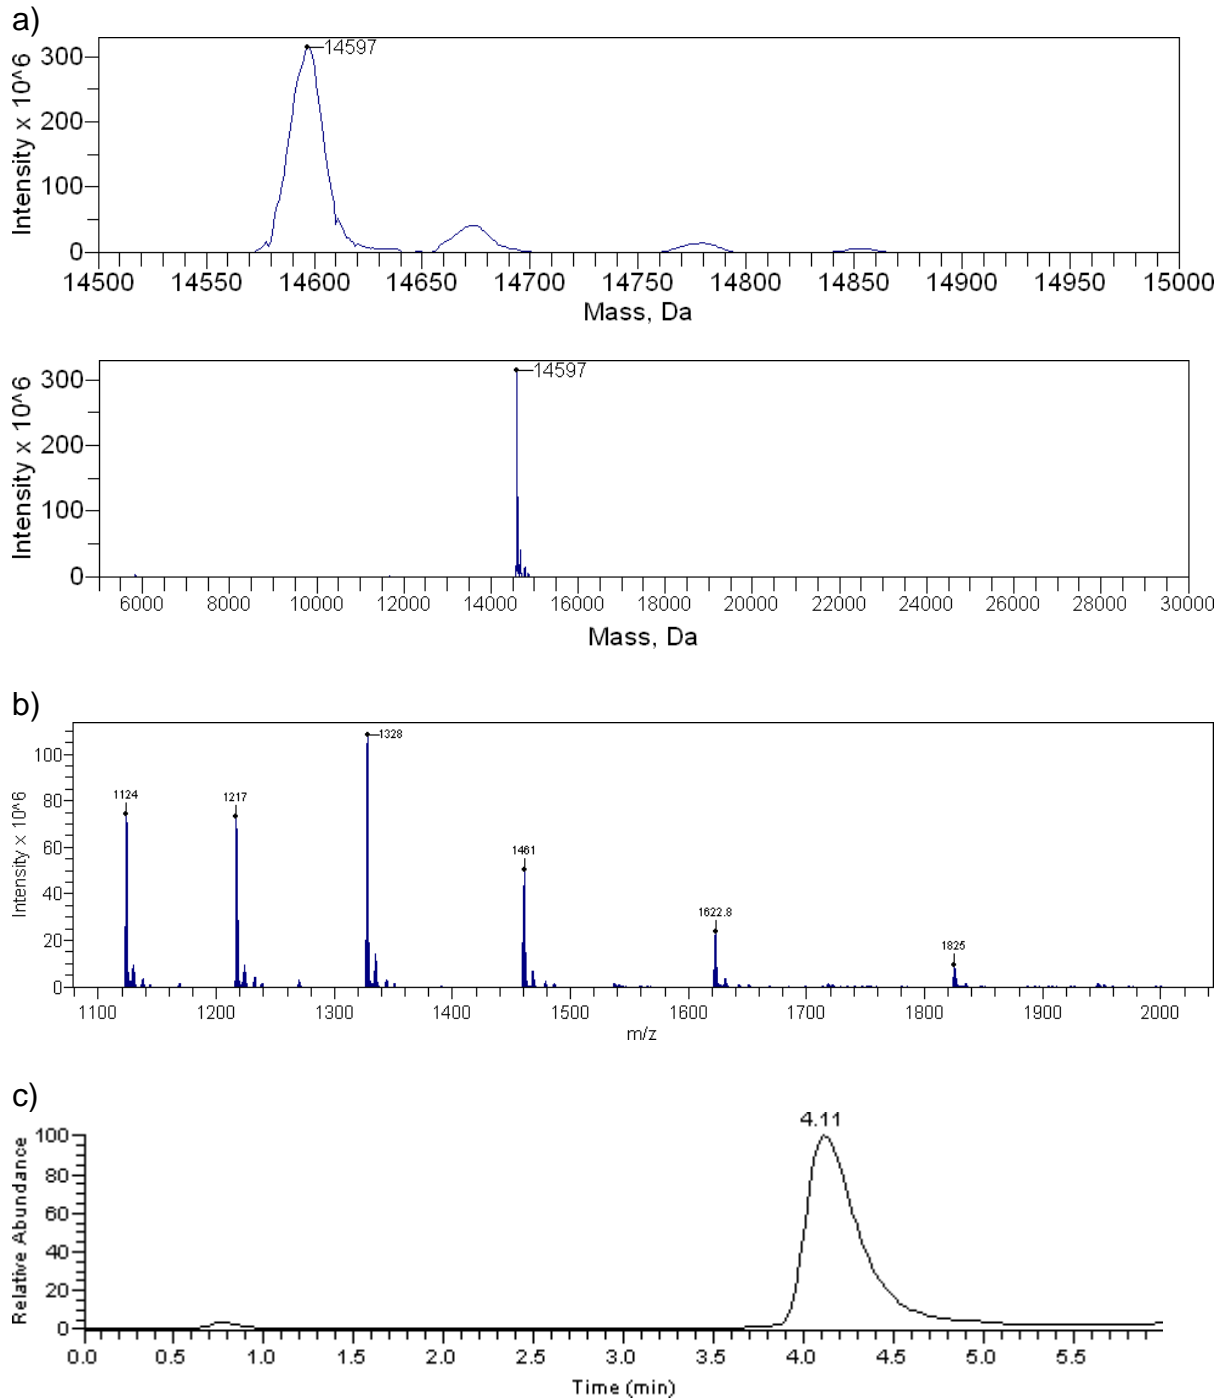

(a) deconvoluted, (b) non-deconvoluted, and (c) TIC mass spectrometry data for HER2DARPin(L135C).

**Supplementary Figure 47. HER2DARPin(L135C) with 1 mM BrAcEGMe, 1 mM EDTA, in PBS pH 7.4, 10% DMF, 2 h, at 4 °C.**

**Expected mass (unmodified) 14586.4 Da**

**Expected mass (modified) 14701.6 Da**

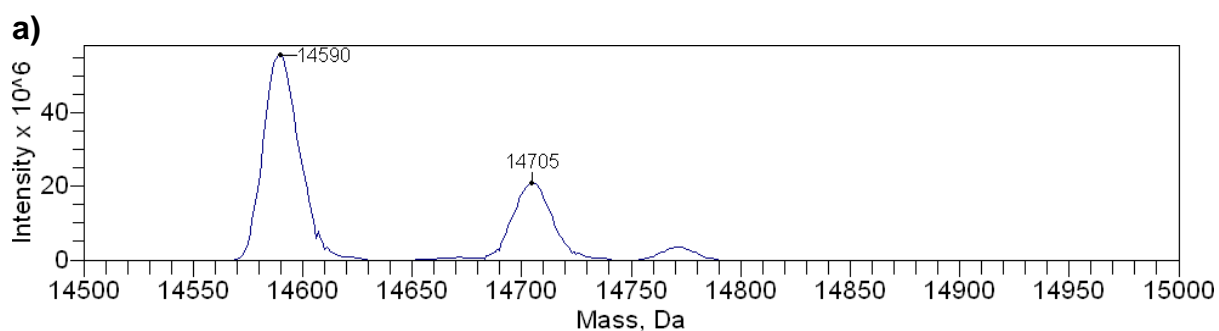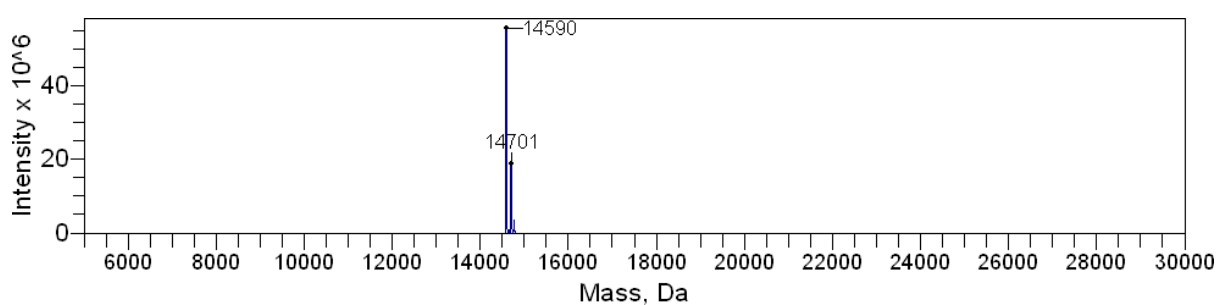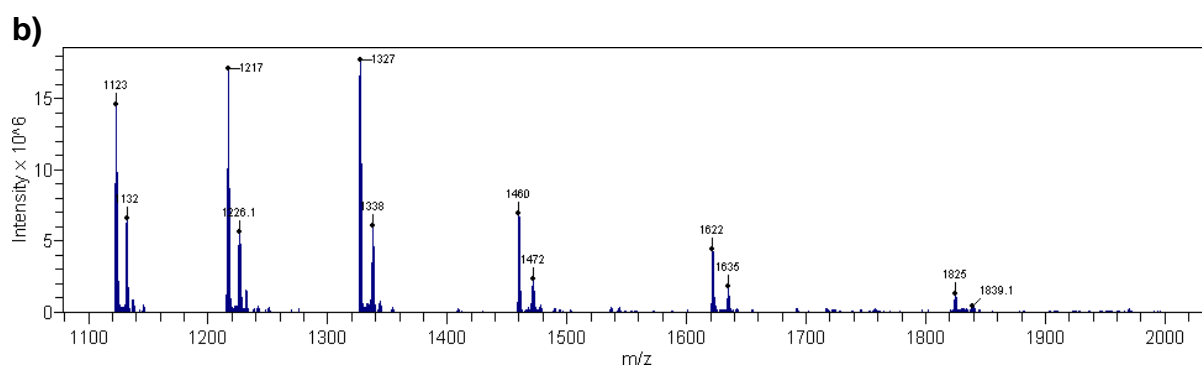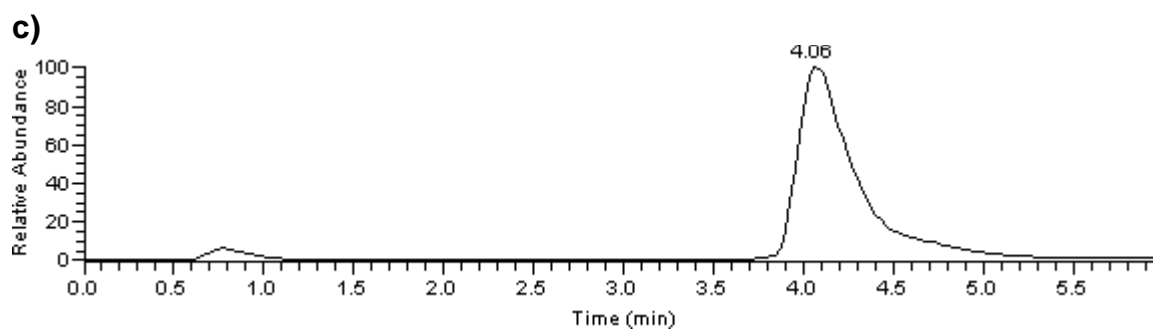

(a) deconvoluted, (b) non-deconvoluted, and (c) TIC mass spectrometry data for HER2DARPin(L135C) reacted with BrAcEGMe.

**Supplementary Figure 48. HER2DARPin(L135C) with 1 mM NMM, 1 mM EDTA, in PBS pH 7.4, 10% DMF, 1 h, at 4 °C.**

**Expected mass (unmodified) 14586.4 Da**

**Expected mass (modified) 14697.5 Da**

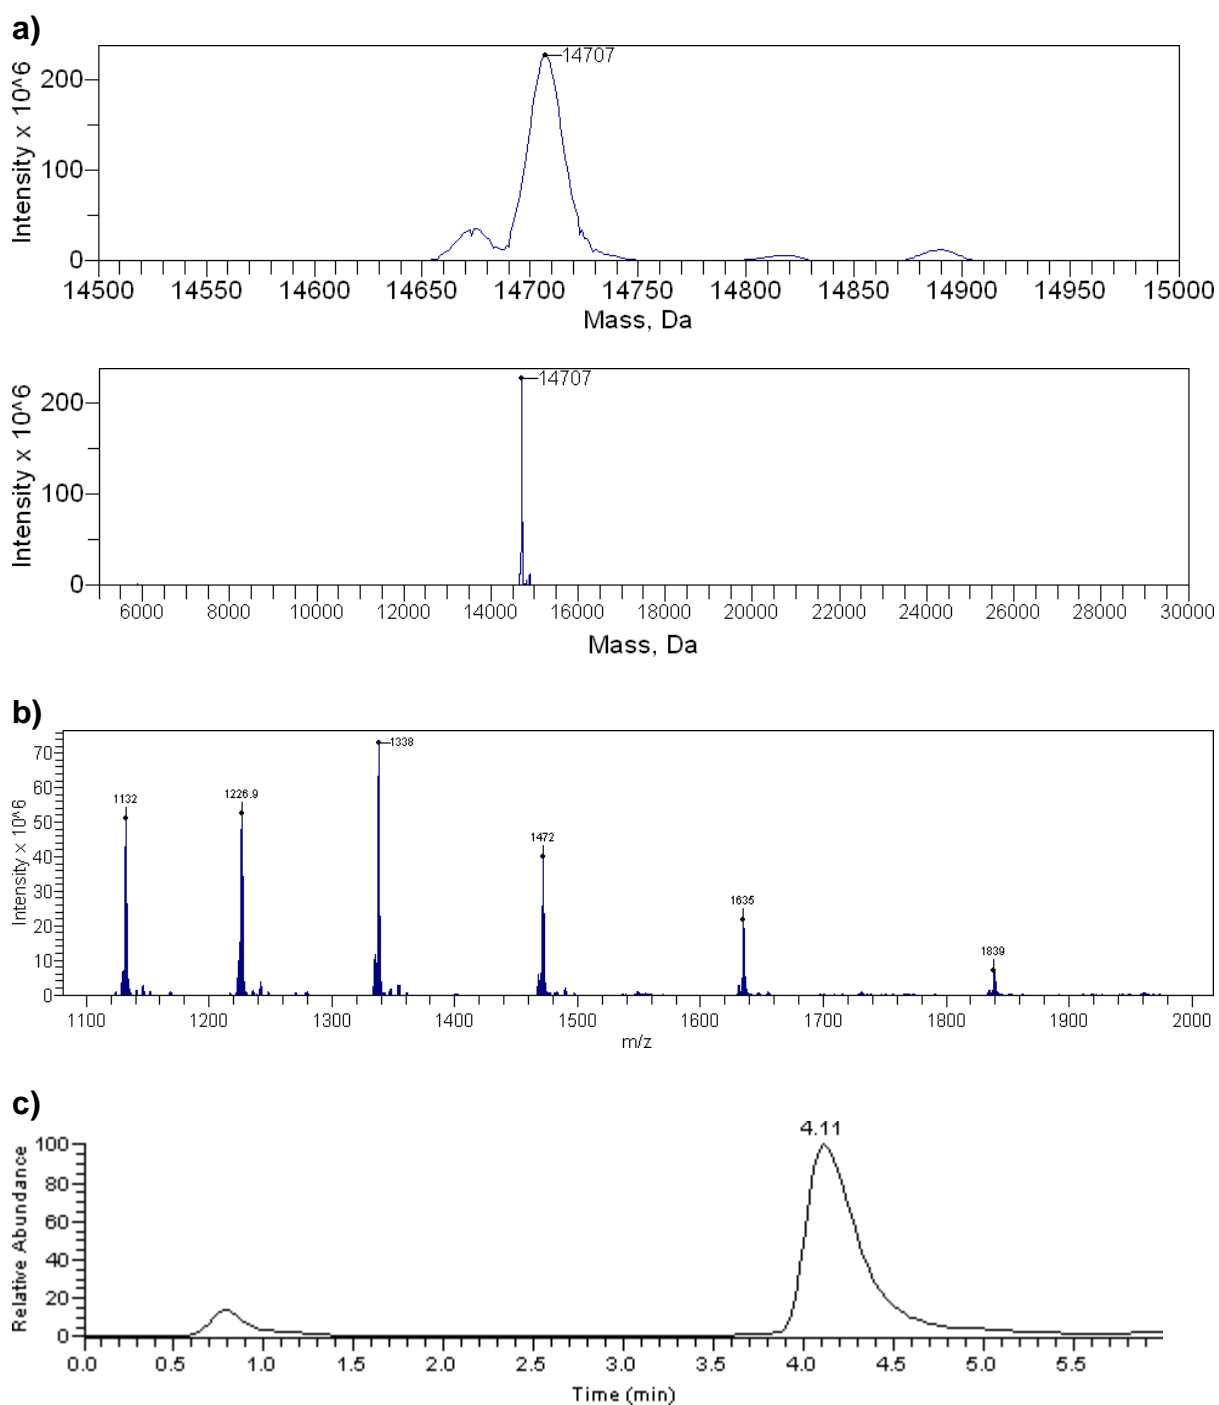

(a) deconvoluted, (b) non-deconvoluted, and (c) TIC mass spectrometry data for HER2DARPin(L135C) reacted with NMM.

**Supplementary Figure 49. HER2DARPin(Cmut, L135C) in PBS, 1 mM EDTA.  
Expected mass 14676.4 Da**

**Sequence**

MRGSHHHHHHGS~~D~~LGKKLLEAARAGQDDEVRI~~L~~MANGADVNAKDEYGLTPLYLATAHGHLEI  
VEVLLKNGADVNAVDAIGFTPLHLAAFIGHLEIAEVLLKHGADVNAQDKFGKTPFDLAIREG  
HEDIAEVLQKCA

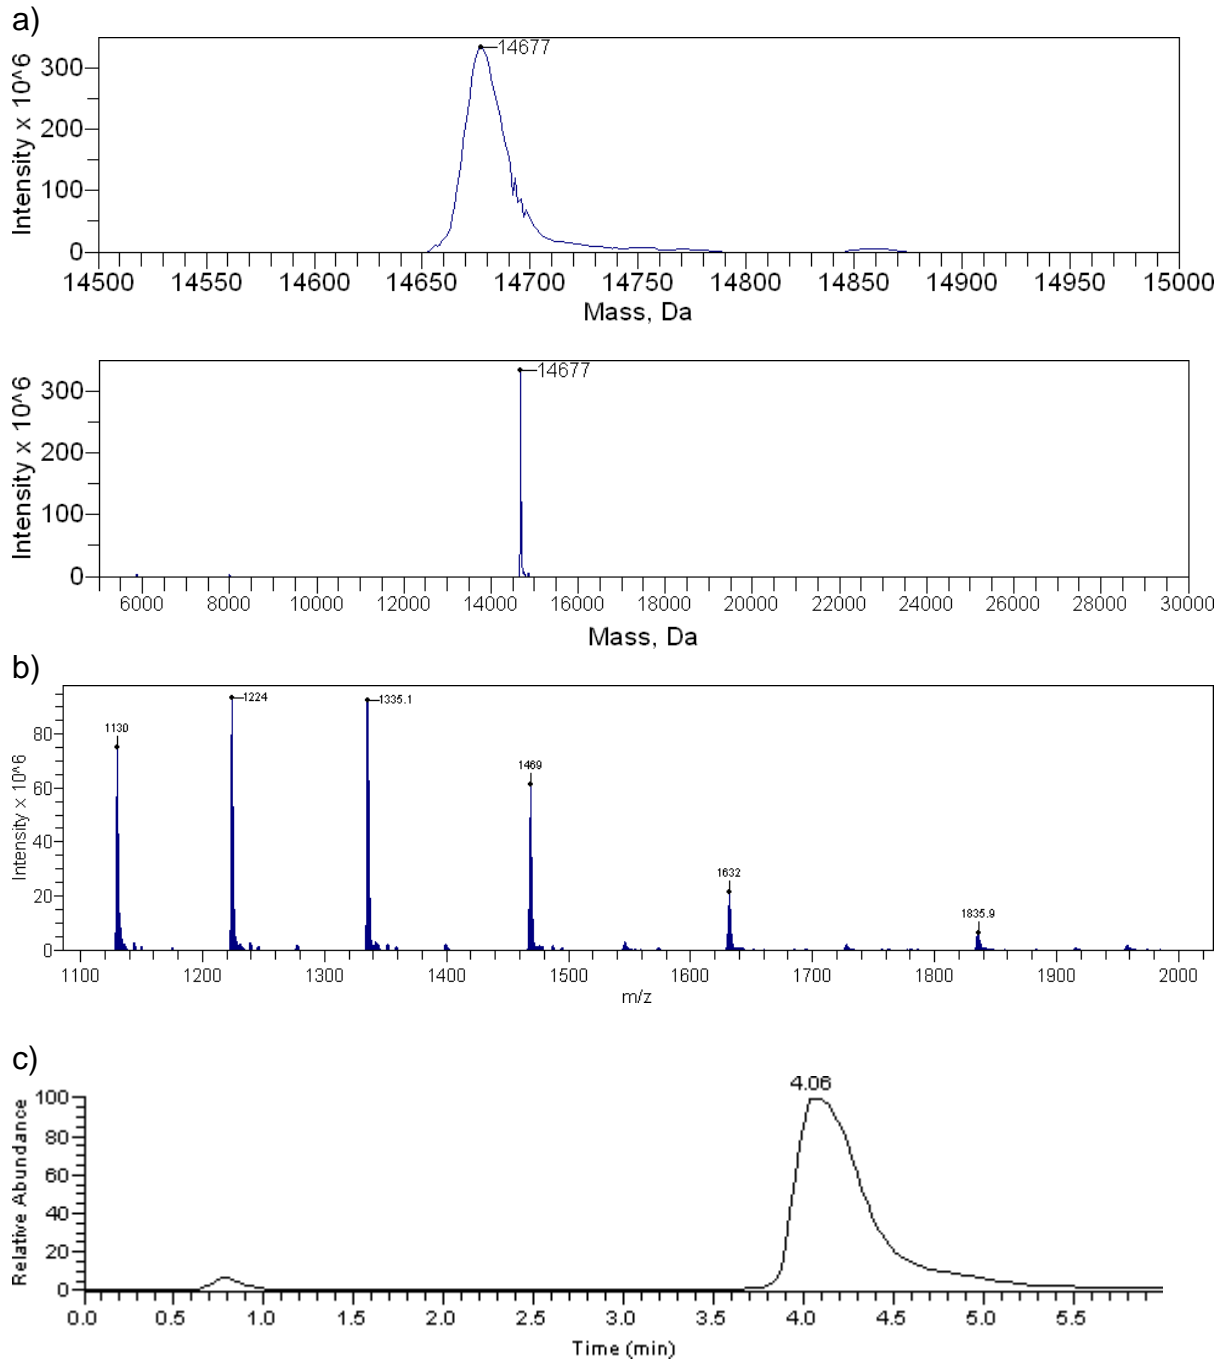

(a) deconvoluted, (b) non-deconvoluted, and (c) TIC mass spectrometry data for HER2DARPin(Cmut, L135C).

**Supplementary Figure 50. HER2DARPin(Cmut, L135C) with 1 mM BrAcEGMe, 1 mM EDTA, in PBS pH 7.4, 10% DMF, 2 h, at 4 °C.**  
**Expected mass (unmodified) 14676.4 Da**  
**Expected mass (modified) 14791.6 Da**

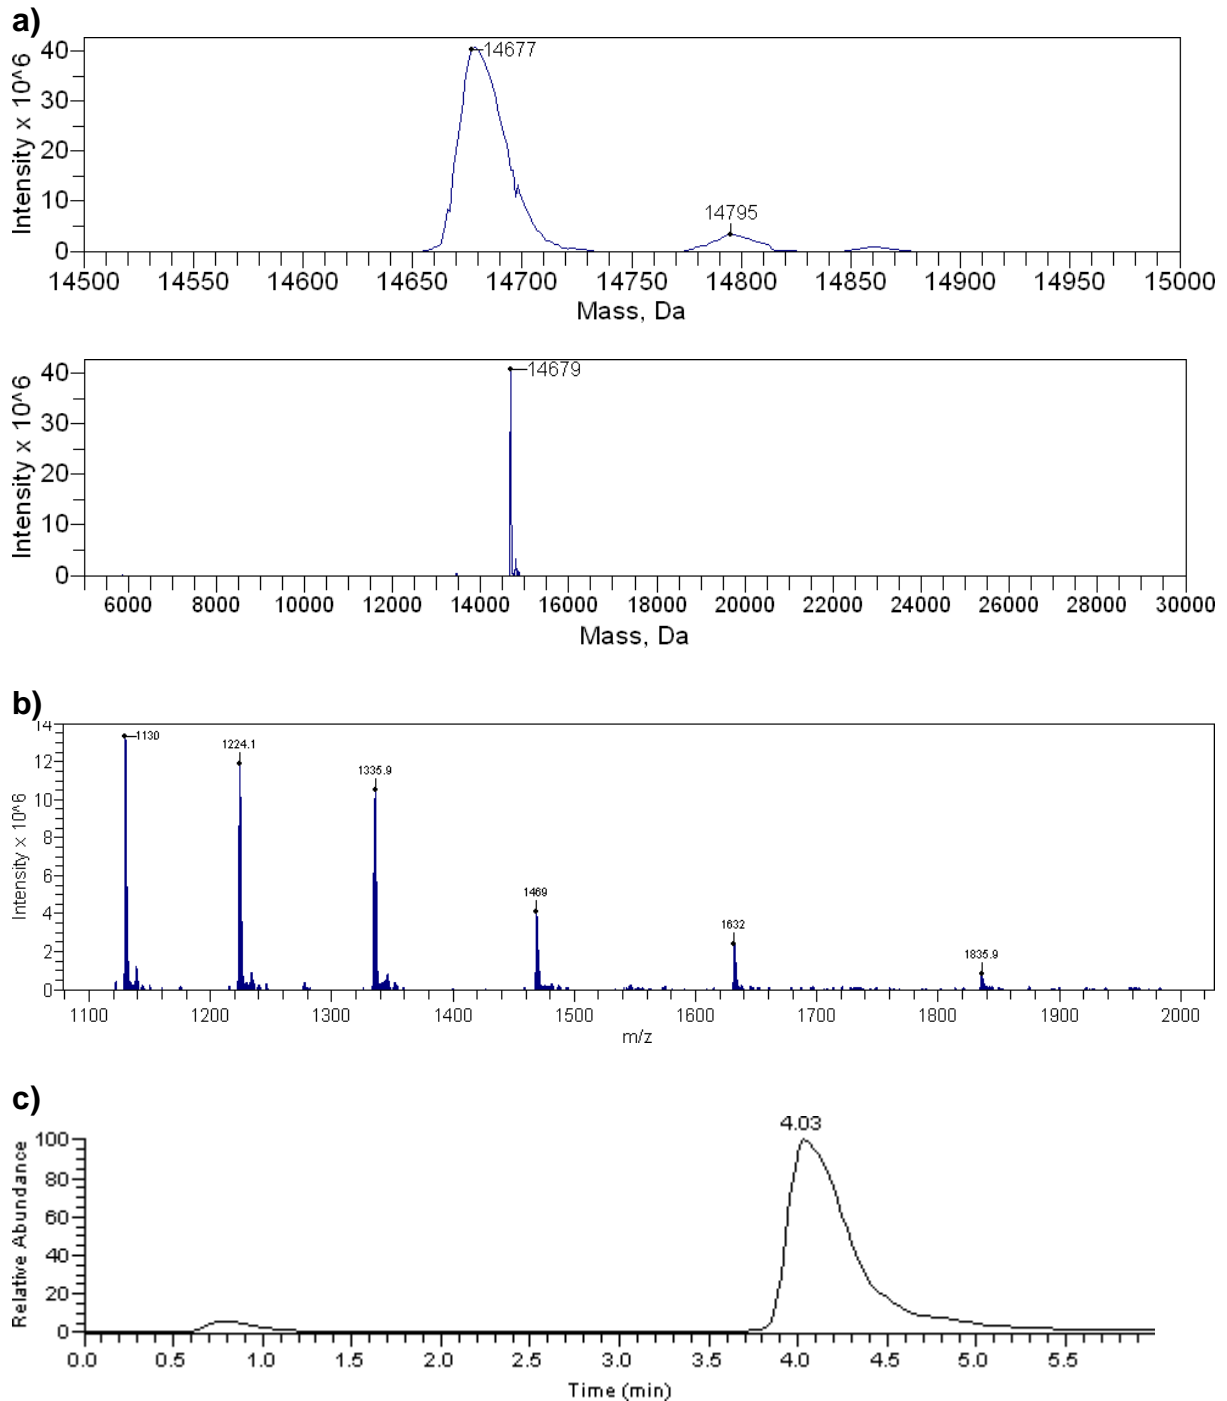

(a) deconvoluted, (b) non-deconvoluted, and (c) TIC mass spectrometry data for HER2DARPin(Cmut, L135C) reacted with BrAcEGMe.

**Supplementary Figure 51. HER2DARPin(Cmut, L135C) with 1 mM NMM, 1 mM EDTA, in PBS pH 7.4, 10% DMF, 1 h, at 4 °C.**

**Expected mass (unmodified) 14676.4 Da**

**Expected mass (modified) 14787.5 Da**

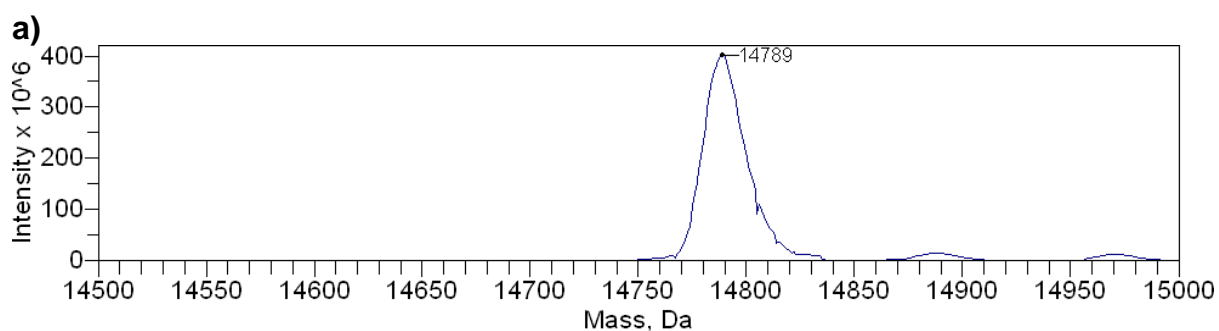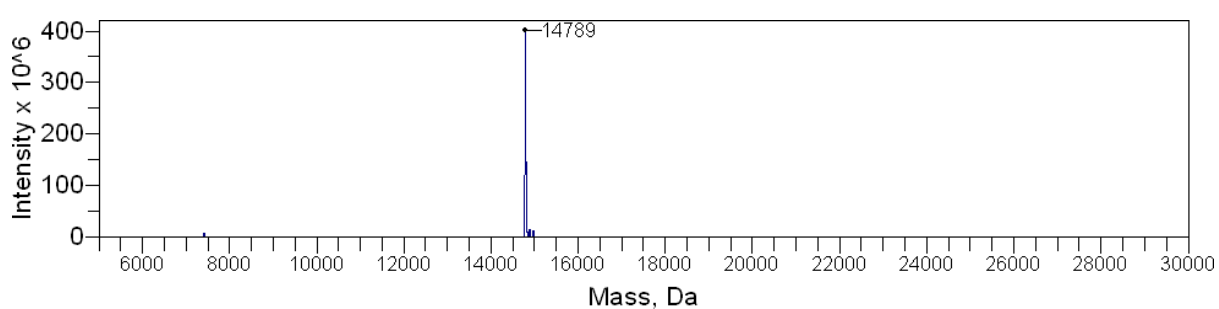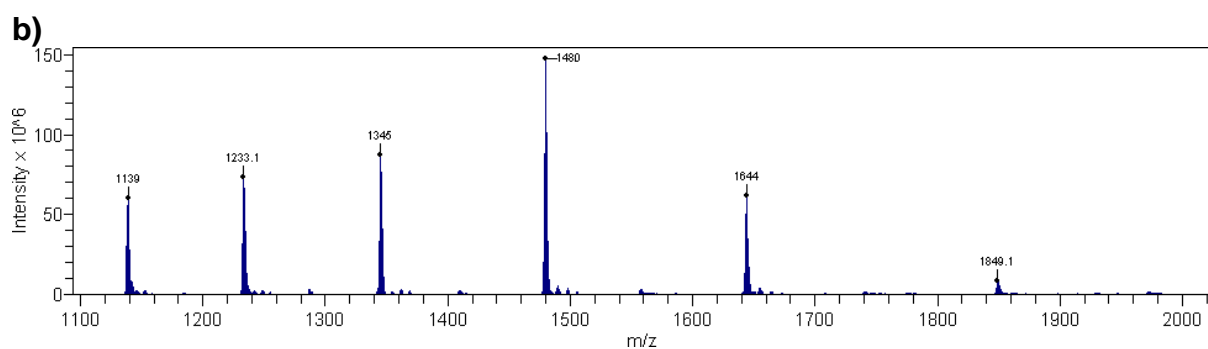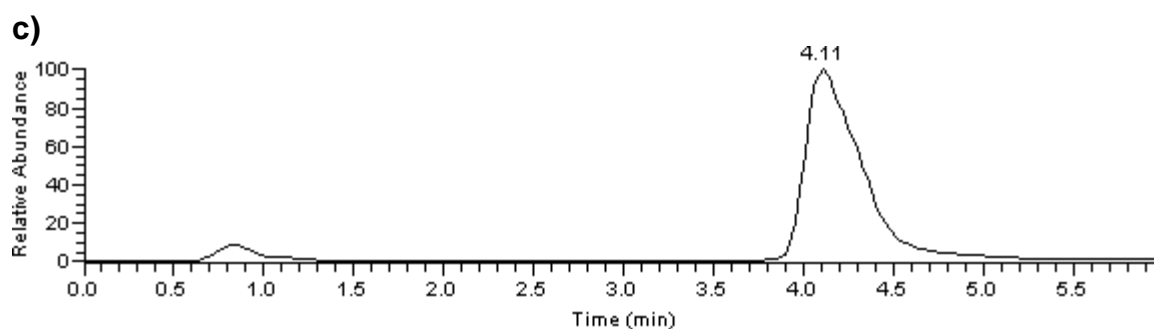

(a) deconvoluted, (b) non-deconvoluted, and (c) TIC mass spectrometry data for HER2DARPin(Cmut, L135C) reacted with NMM.



**Supplementary Figure 52. HER2DARPin(N69C, D72C) in PBS, 1 mM EDTA.  
Expected mass 14573.4 Da**

**Sequence**

MRGSHHHHHHGS~~DL~~GKKLLEAARAGQDDEVRI~~LM~~ANGADVNAKDEYGLTPLYLATAHGHLEI  
VEVLLK~~C~~G~~A~~VNAVDAIGFTPLHLAAFIGHLEIAEVLLKHGADVNAQDKFGKTA~~FD~~ISIGNG  
NEDLAEILQKLN

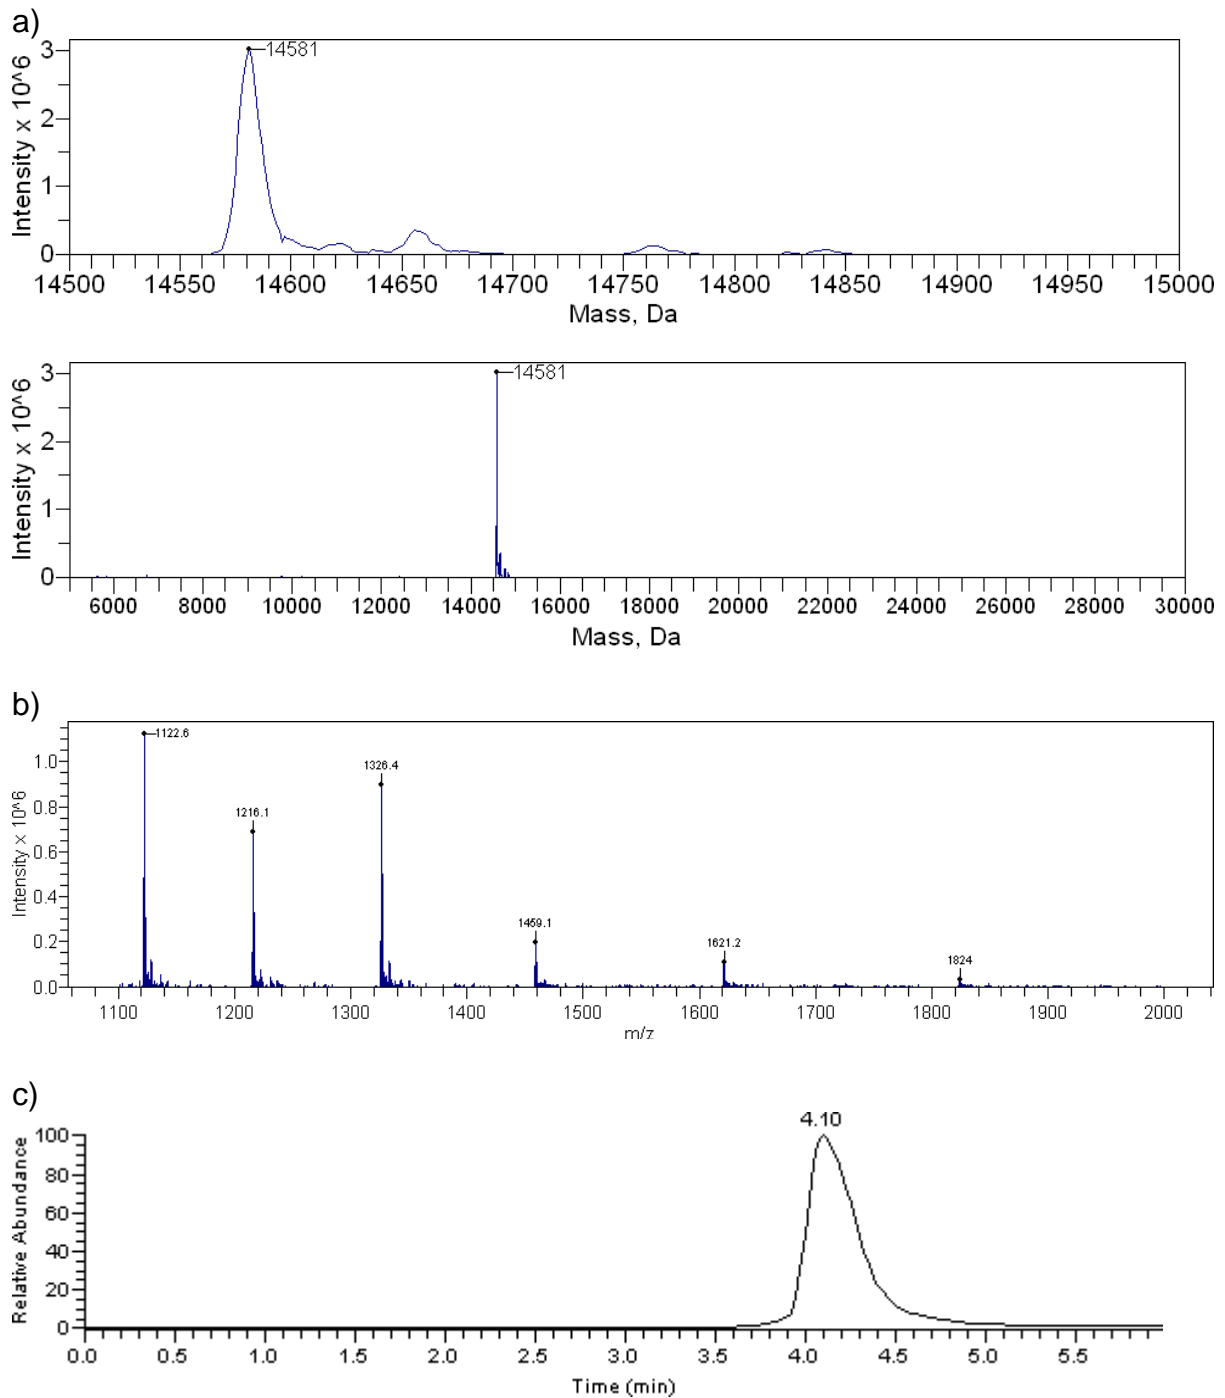

(a) deconvoluted, (b) non-deconvoluted, and (c) TIC mass spectrometry data for HER2DARPin(N69C, D72C).

**Supplementary Figure 53. HER2DARPin(N69C, D72C) with 1 mM BrAcEGMe, 1 mM EDTA, in PBS pH 7.4, 10% DMF, 2 h, at 4 °C.**

**Expected mass (unmodified) 14573.4 Da**

**Expected mass (singly modified) 14688.6 Da**

**Expected mass (doubly modified) 14803.8 Da**

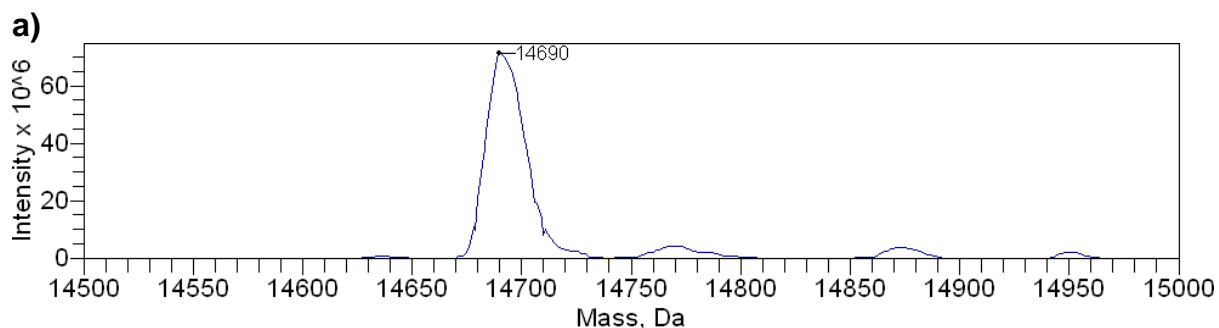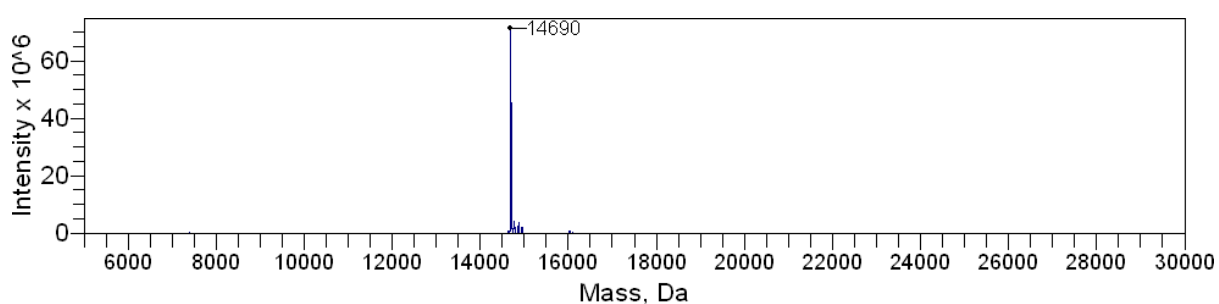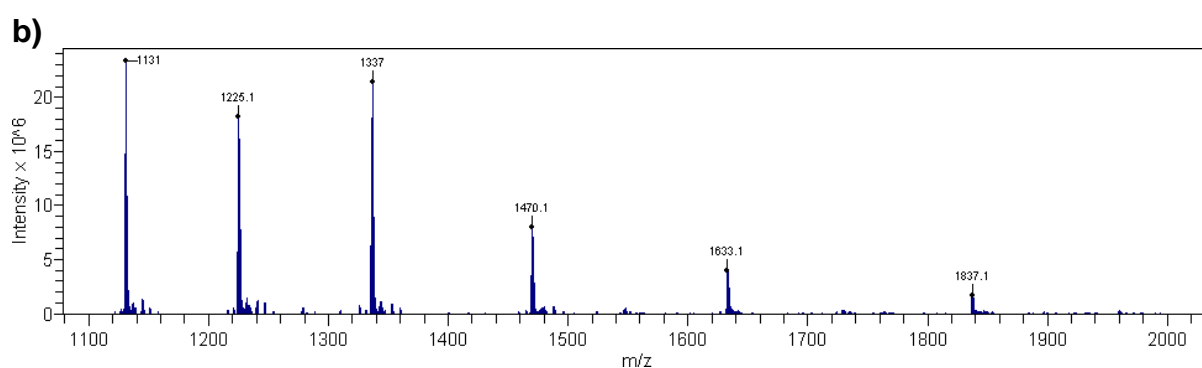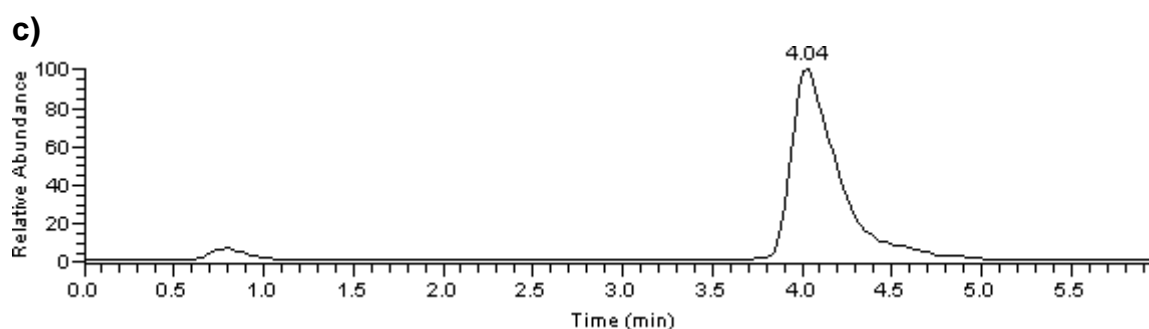

(a) deconvoluted, (b) non-deconvoluted, and (c) TIC mass spectrometry data for HER2DARPin(N69C, D72C) reacted with BrAcEGMe.

**Supplementary Figure 54. HER2DARPin(N69C, D72C) with 1 mM NMM, 1 mM EDTA, in PBS pH 7.4, 10% DMF, 1 h, at 4 °C.**

**Expected mass (unmodified) 14573.4 Da**

**Expected mass (singly modified) 14684.5 Da**

**Expected mass (doubly modified) 14795.6 Da**

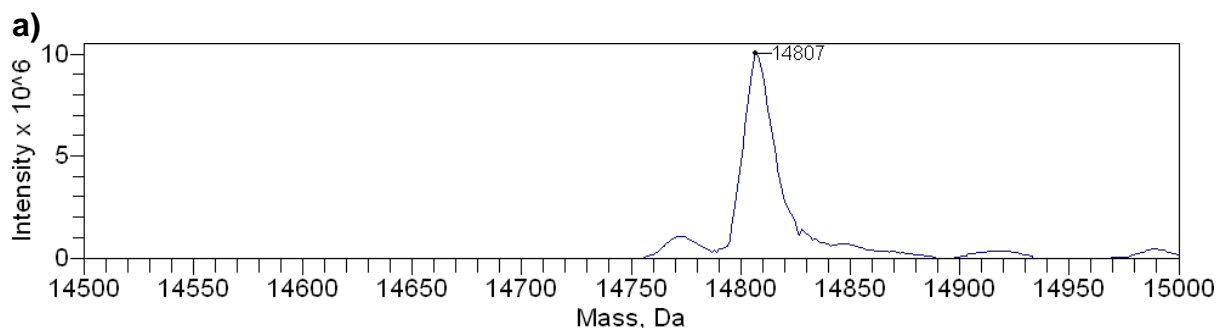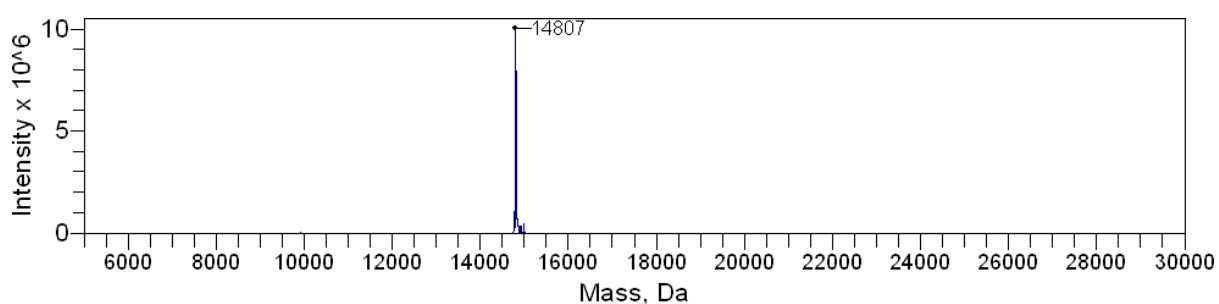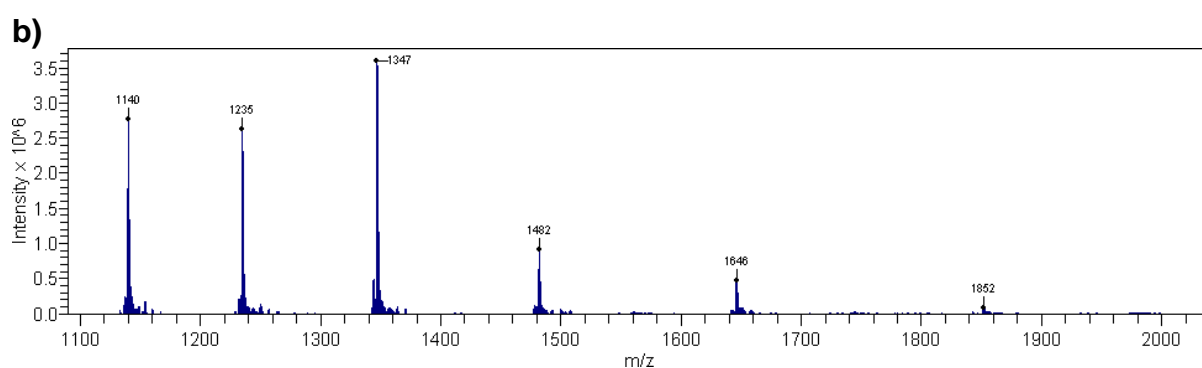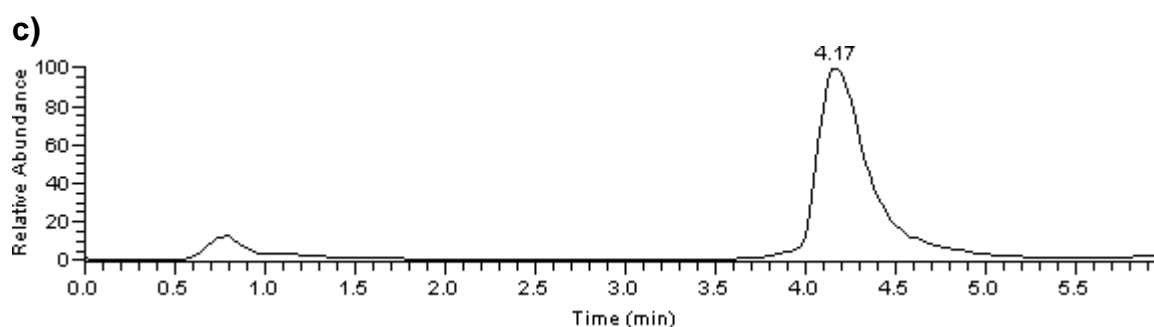

(a) deconvoluted, (b) non-deconvoluted, and (c) TIC mass spectrometry data for HER2DARPin(N69C, D72C) reacted with NMM.

**Supplementary Figure 55. Mut4DARPin(N69C, D72C) in PBS, 1 mM EDTA.  
Expected mass 11133.4 Da**

**Sequence**

MRGSHHHHHHGS~~DL~~GKKLL~~EA~~ARAGQDDEVRI~~LM~~ANGADVNAKDKDGYT~~PL~~H~~LA~~AAREGHL  
EIVEVLLK~~C~~G~~A~~C~~V~~NAQDKFGKTA~~FD~~ISIDNGNED~~LA~~EILQKAA

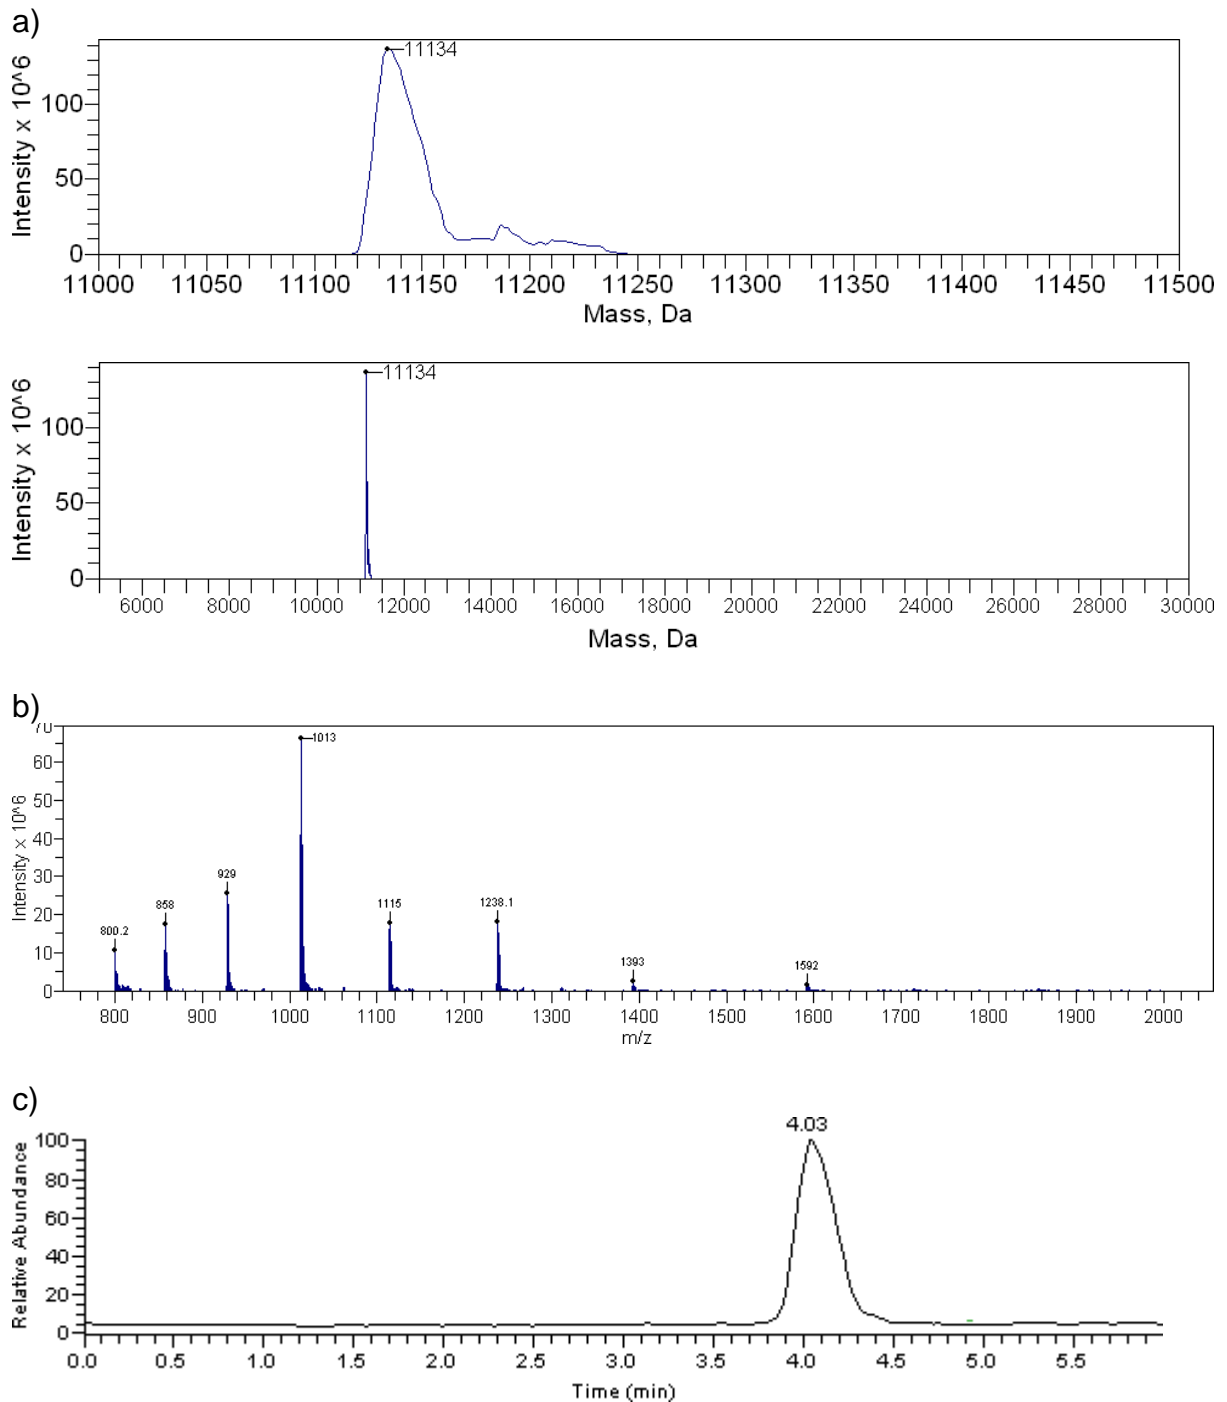

(a) deconvoluted, (b) non-deconvoluted, and (c) TIC mass spectrometry data for Mut4DARPin(N69C, D72C).

**Supplementary Figure 56. Mut4DARPin(N69C, D72C) with 1 mM BrAcEGMe, 1 mM EDTA, in PBS pH 7.4, 10% DMF, 2 h, at 4 °C.**

**Expected mass (unmodified) 11133.4 Da**

**Expected mass (singly modified) 11248.6 Da**

**Expected mass (doubly modified) 11363.8 Da**

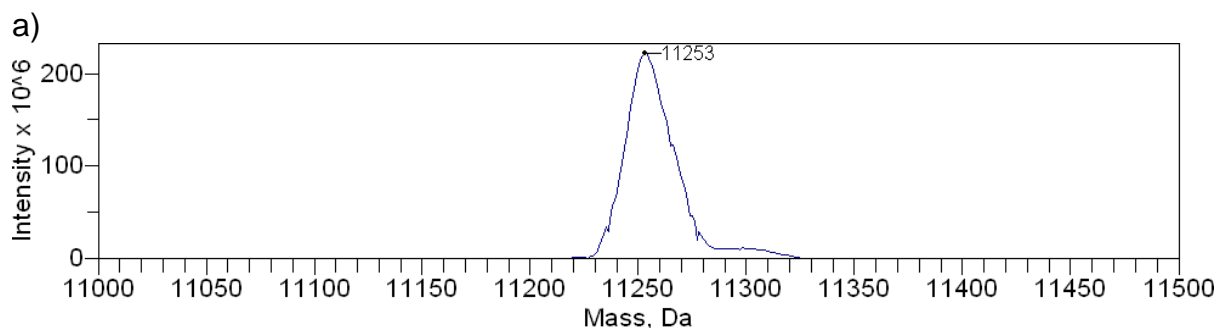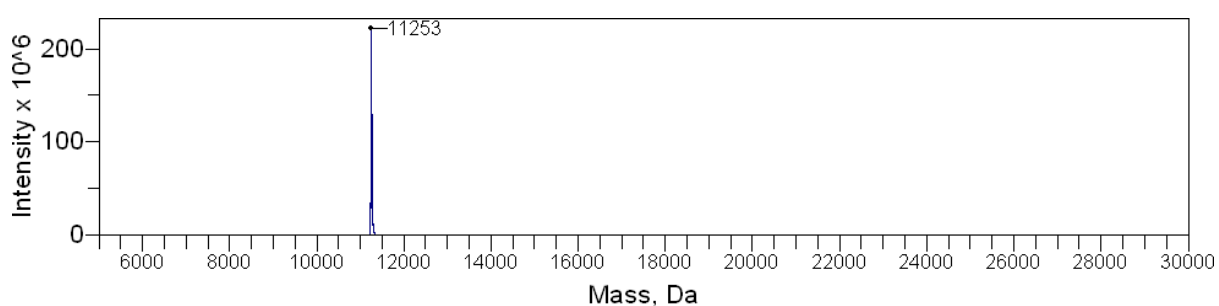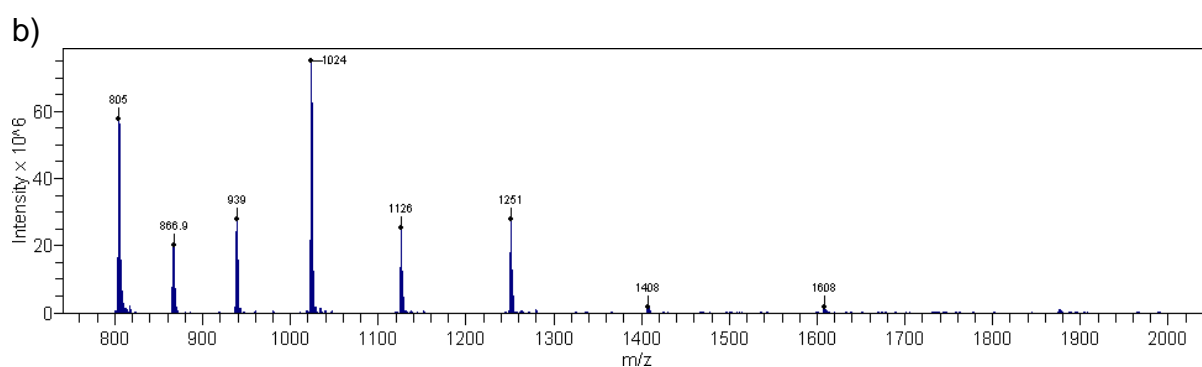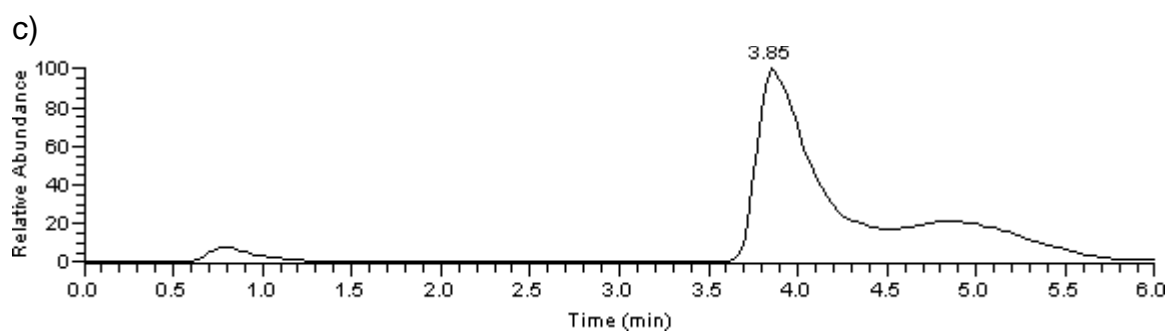

(a) deconvoluted, (b) non-deconvoluted, and (c) TIC mass spectrometry data for Mut4DARPin(N69C, D72C) reacted with BrAcEGMe.

**Supplementary Figure 57. Mut4DARPin(N69C, D72C) with 1 mM NMM, 1 mM EDTA, in PBS pH 7.4, 10% DMF, 1 h, at 4 °C.**

**Expected mass (unmodified) 11133.4 Da**

**Expected mass (singly modified) 11233.5 Da**

**Expected mass (doubly modified) 11355.6 Da**

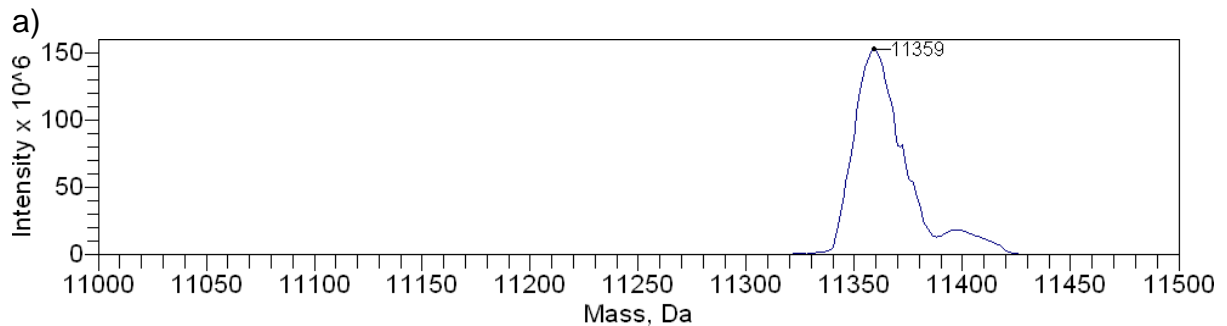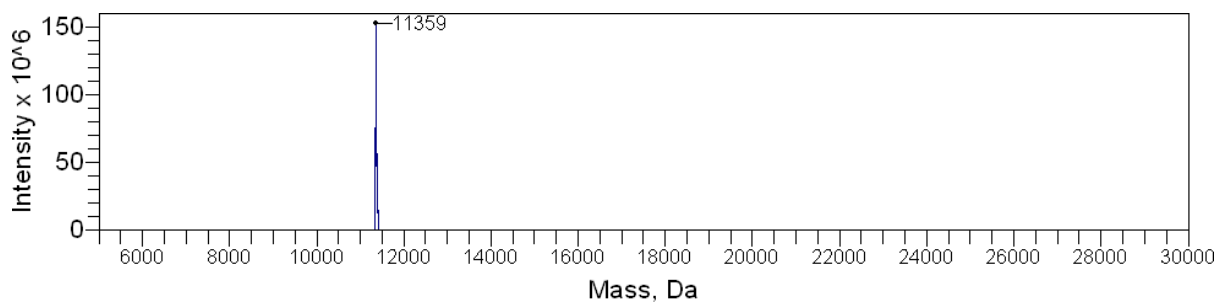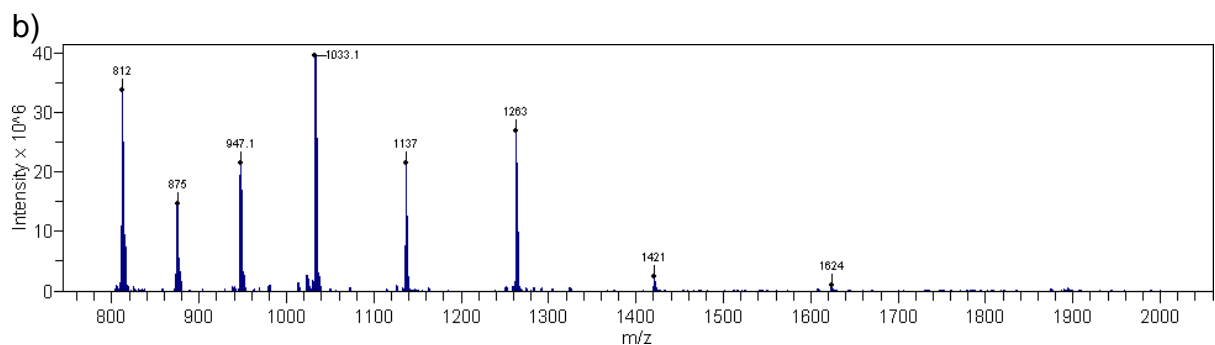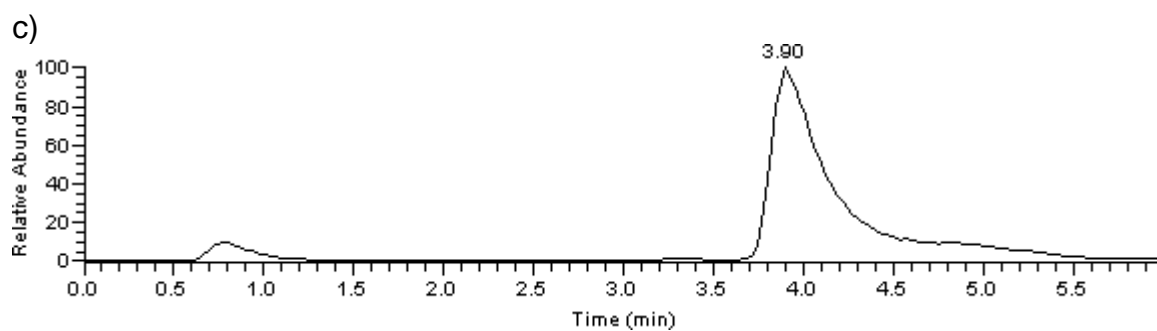

(a) deconvoluted, (b) non-deconvoluted, and (c) TIC mass spectrometry data for Mut4DARPin(N69C, D72C) reacted with NMM.

**Supplementary Figure 58. HER2DARPin(N36C, D105C) in PBS, 1 mM EDTA.  
Expected mass 14573.5 Da**

Sequence

MRGSHHHHHHGS~~DL~~GKKLLEAARAGQDDEVRI~~LM~~ACGADVNAKDEYGLTPLYLAT  
AHGHLEIVEVLLKNGADVNAVDAIGFTPLHLAAFIGHLEIAEVLLKHGACVNAQDKFG  
KTA~~FD~~ISIGNGNEDLAEILQKLN

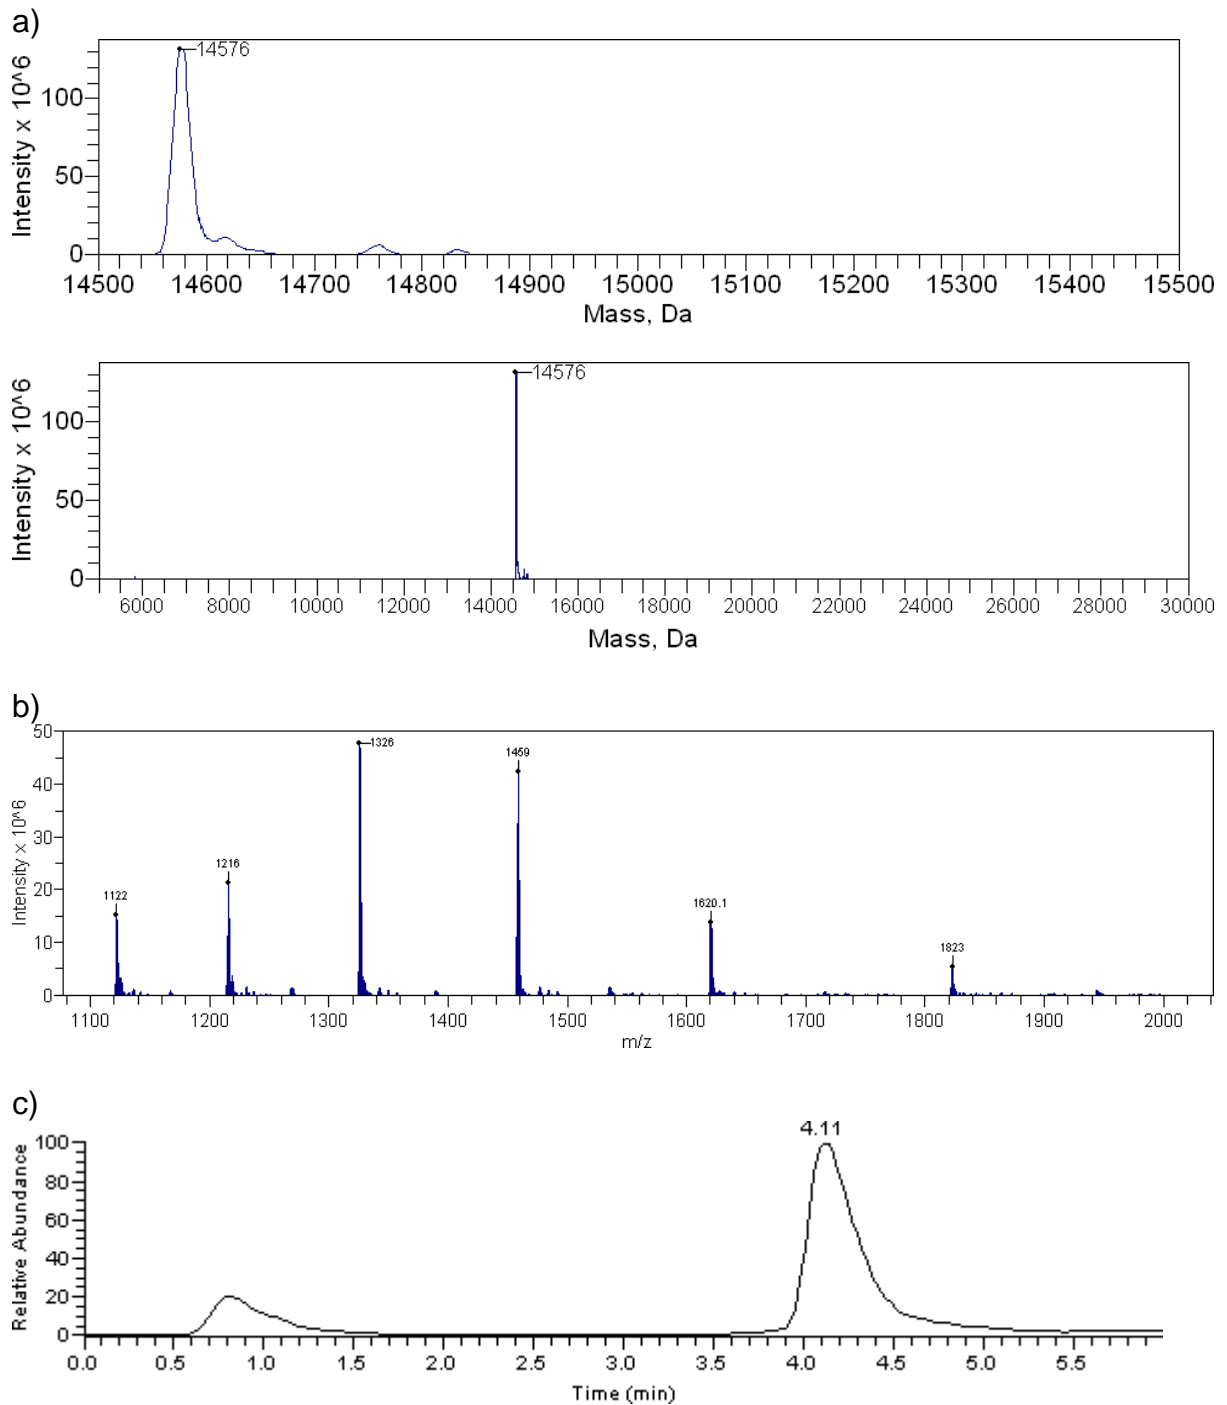

(a) deconvoluted, (b) non-deconvoluted, and (c) TIC mass spectrometry data for HER2DARPin(N36C, D105C).

**Supplementary Figure 59. HER2DARPin(N36C, D105C) with 1 mM BrAcEGMe, 1 mM EDTA, in PBS pH 7.4, 10% DMF, 2 h, at 4 °C.**

**Expected mass (unmodified) 14573.4 Da**

**Expected mass (singly modified) 14688.6 Da**

**Expected mass (doubly modified) 14803.8 Da**

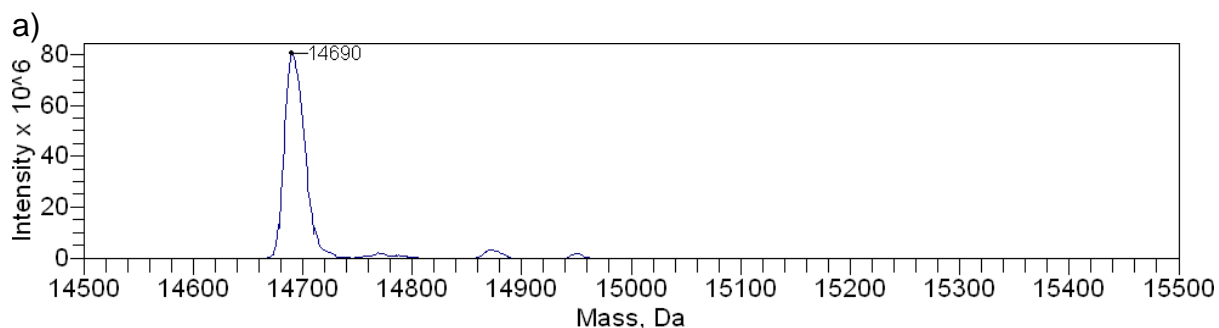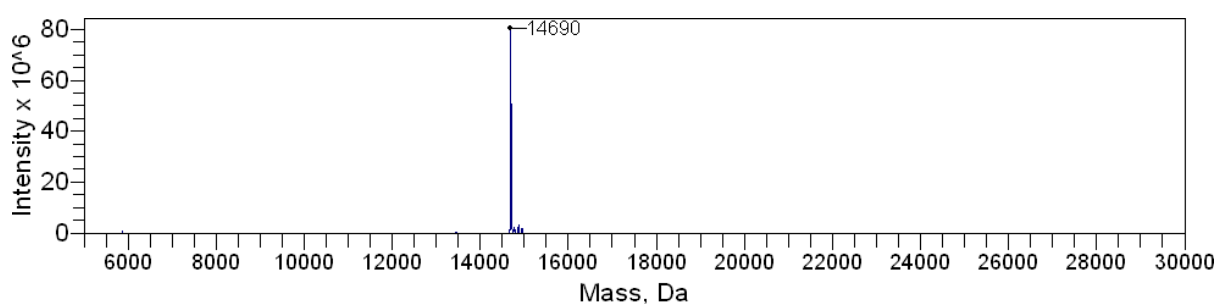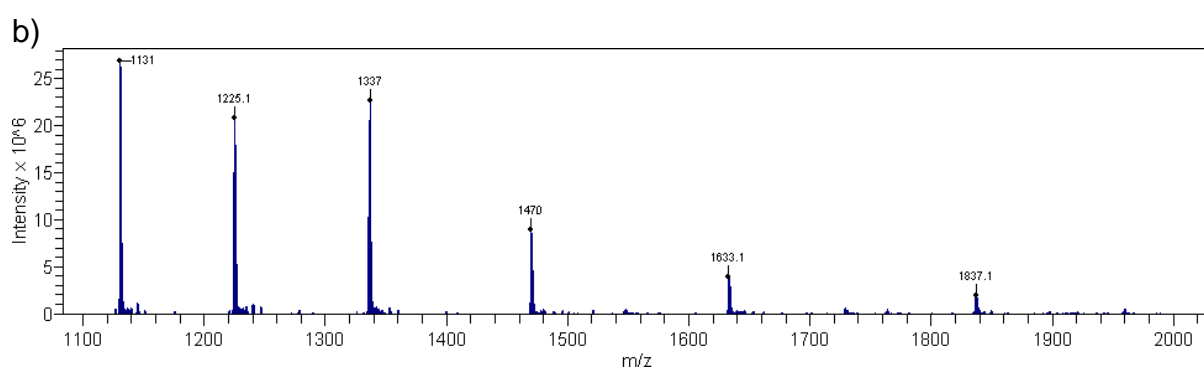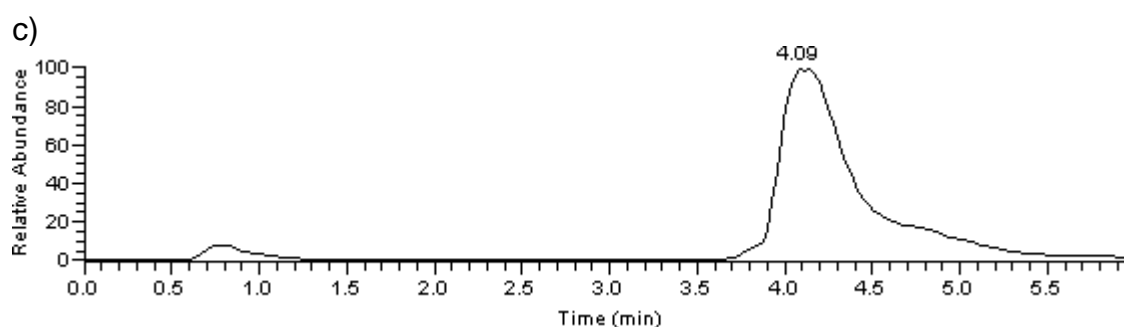

(a) deconvoluted, (b) non-deconvoluted, and (c) TIC mass spectrometry data for HER2DARPin(N36C, D105C) reacted with BrAcEGMe.



**Supplementary Figure 60. HER2DARPin(N36C, D105C) with 1 mM NMM, 1 mM EDTA, in PBS pH 7.4, 10% DMF, 1 h, at 4 °C.**

**Expected mass (unmodified) 14573.4 Da**

**Expected mass (singly modified) 14684.5 Da**

**Expected mass (doubly modified) 14795.6 Da**

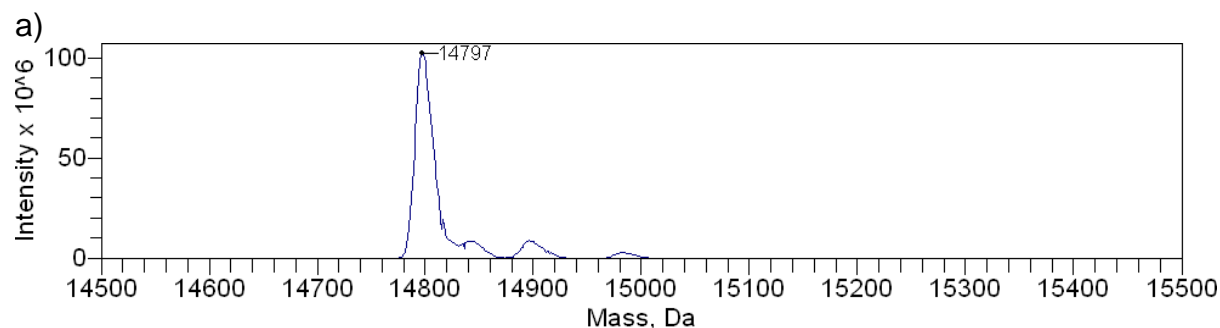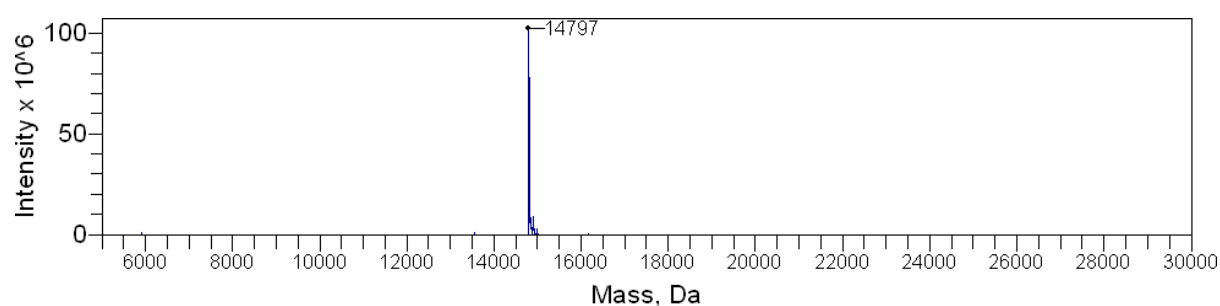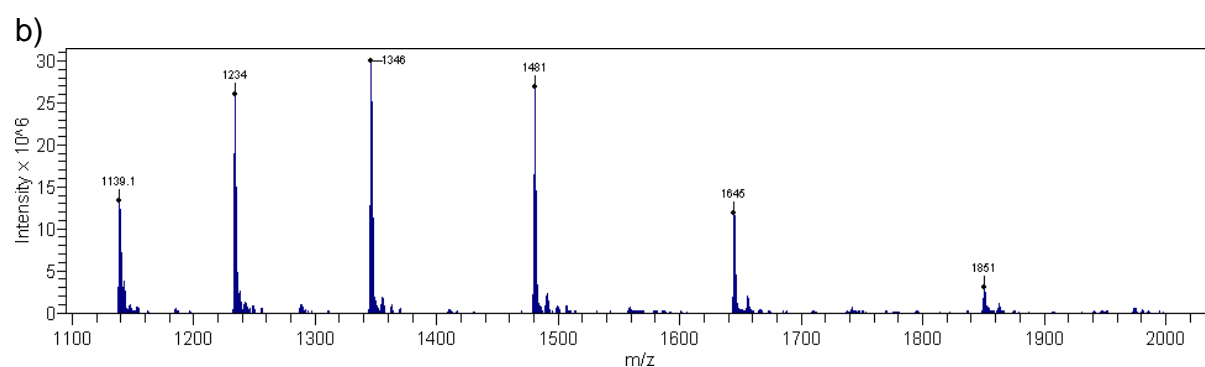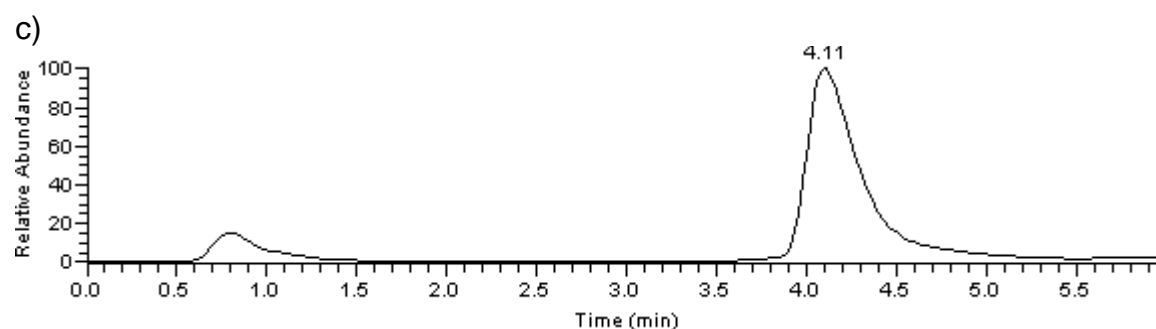

(a) deconvoluted, (b) non-deconvoluted, and (c) TIC mass spectrometry data for HER2DARPin(N36C, D105C) reacted with NMM.

**Supplementary Figure 61. HER2DARPin(N36C, D105CAcEGMe) with 1 mM TMRM, 1 mM EDTA, in PBS pH 7.4, 10% DMF, 1 h, at 4 °C.**

**Expected mass (unreacted) 14688.6 Da**

**Expected mass (reacted) 15241.2 Da**

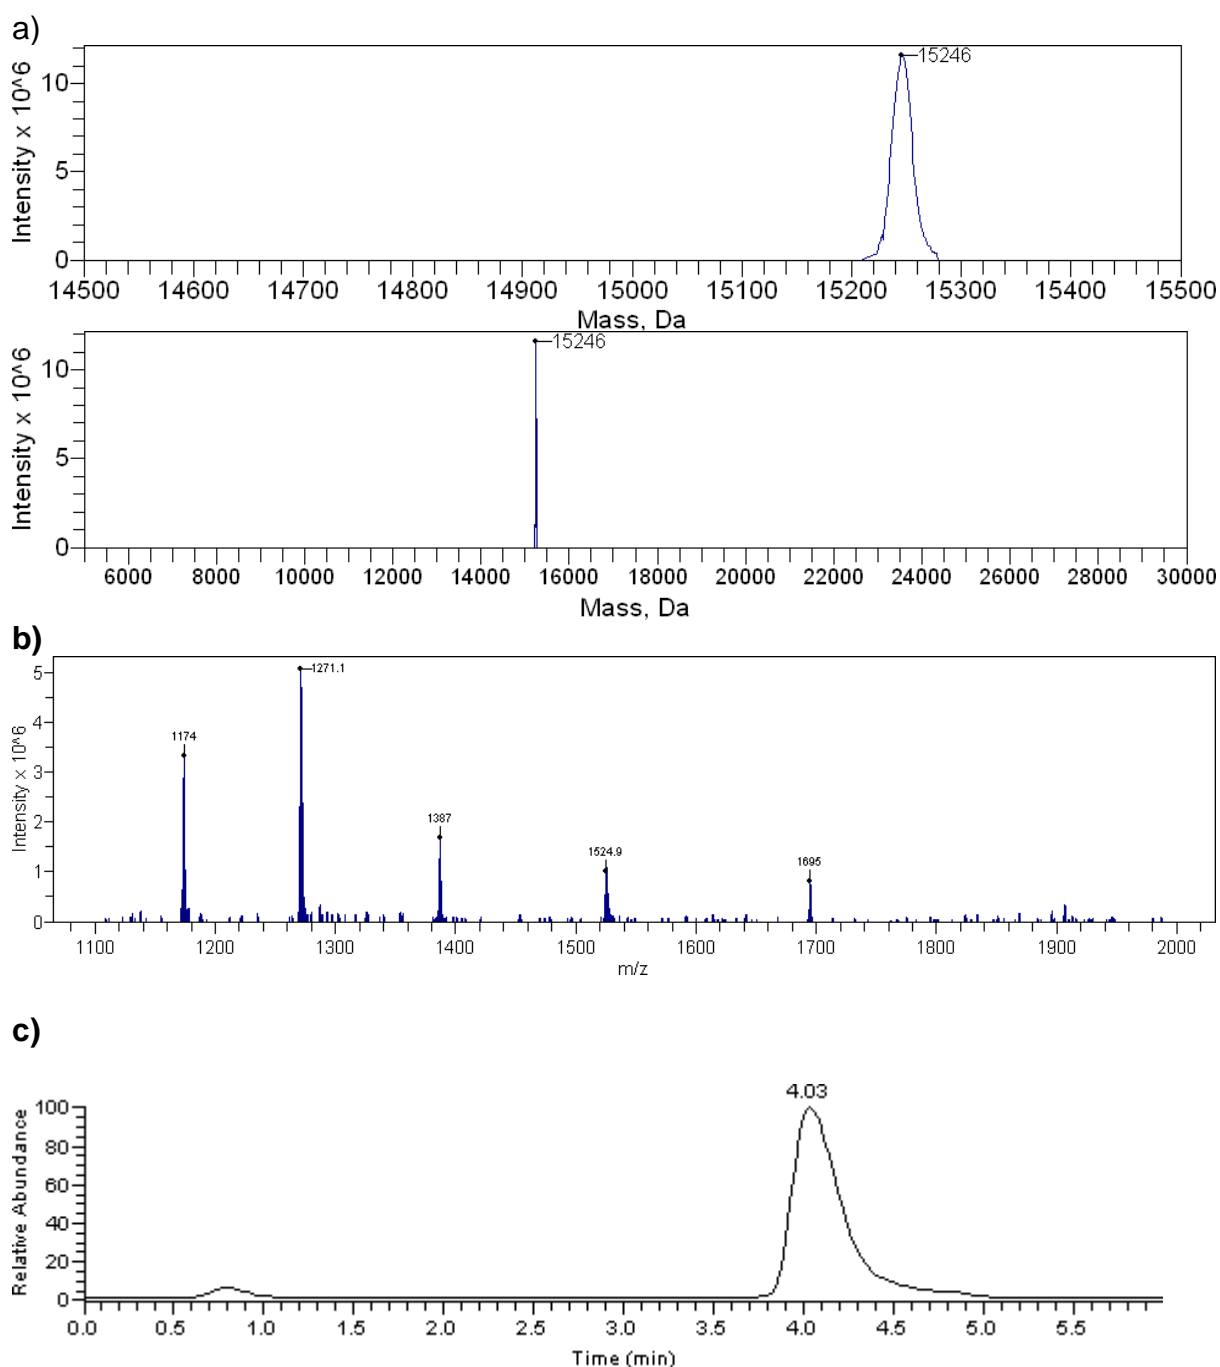

(a) deconvoluted, (b) non-deconvoluted, and (c) TIC mass spectrometry data for HER2DARPin(N36C, D105CAcEGMe) reacted with TMRM to form HER2DARPin(N36CTMRM, D105CAcEGMe).

**Supplementary Figure 62. HER2DARPin(N69C, D72CAcEGMe) with 1 mM NMM, 1 mM EDTA, in PBS pH 7.4, 10% DMF, 1 h, at 4 °C.**

**Expected mass (unreacted) 14688.6 Da**

**Expected mass (reacted) 14799.7 Da**

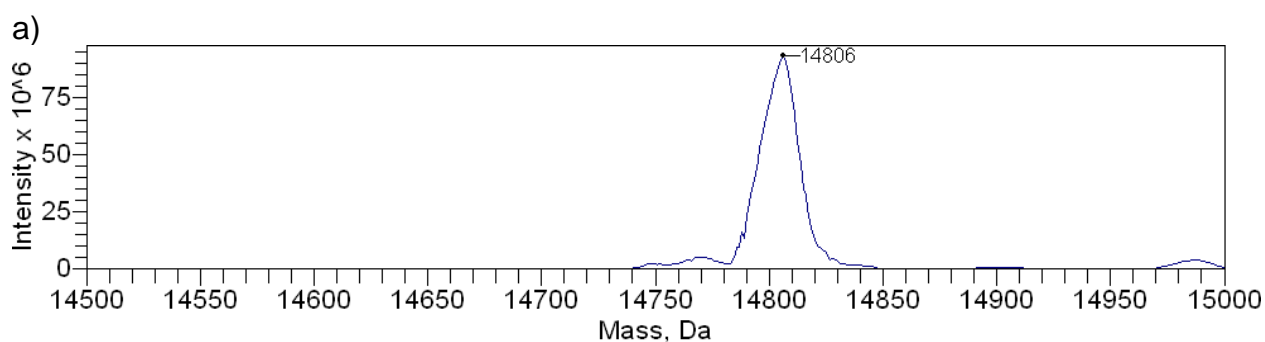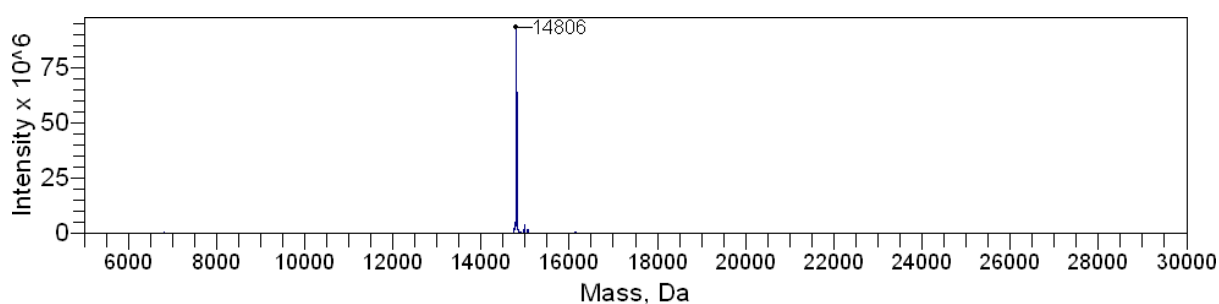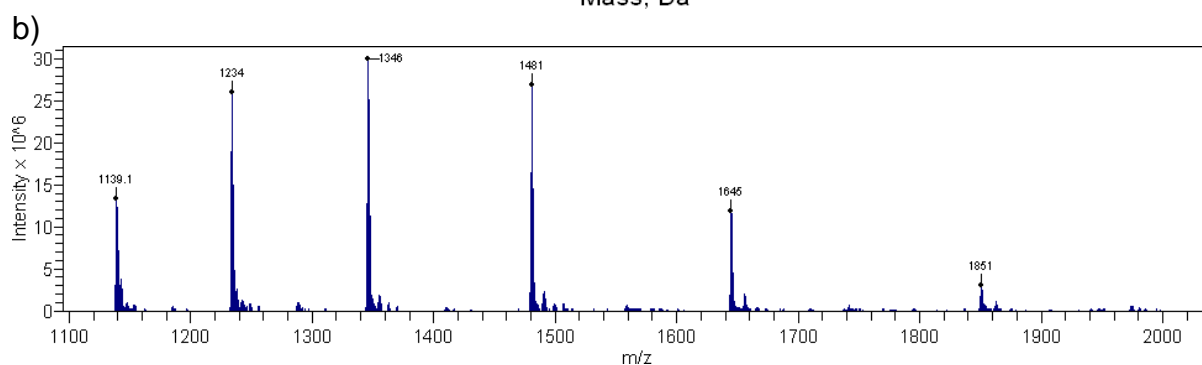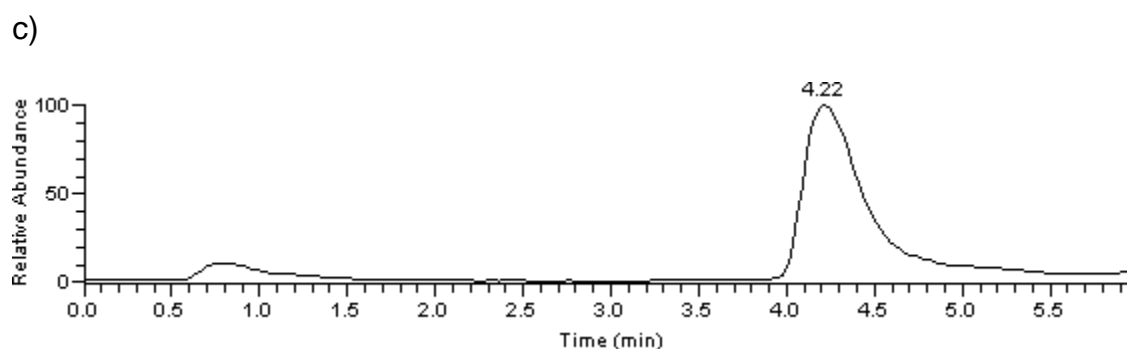

(a) deconvoluted, (b) non-deconvoluted, and (c) TIC mass spectrometry data for HER2DARPin(N69C, D72CAcEGMe) reacted with NMM to form HER2DARPin(N69CNMM, D72CAcEGMe).

**Supplementary Figure 63. Mut4DARPin(N69C, D72CAcEGMe) with 1 mM NMM, 1 mM EDTA, in PBS pH 7.4, 10% DMF, 1 h, at 4 °C.**

**Expected mass (unreacted) 11248.6 Da**

**Expected mass (reacted) 11359.7 Da**

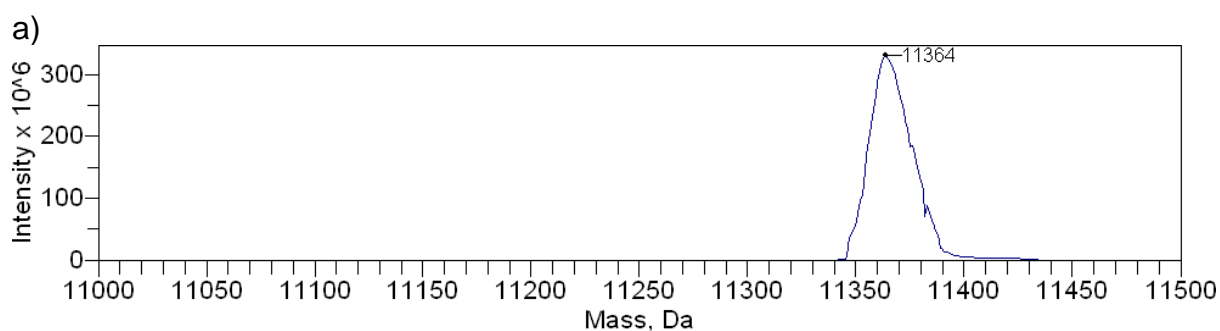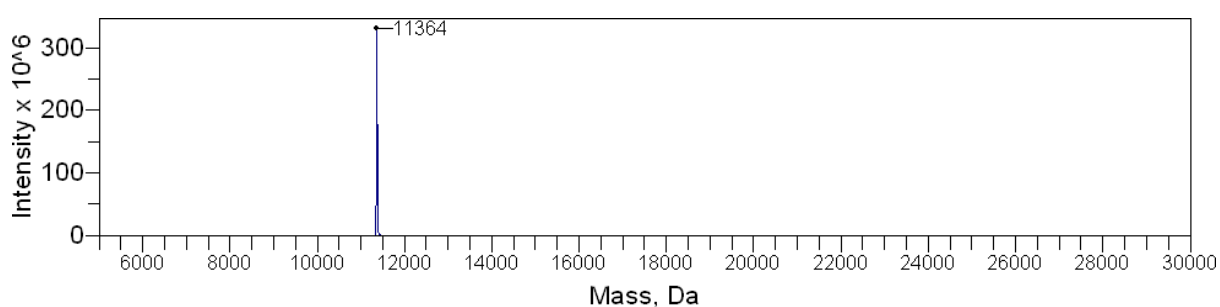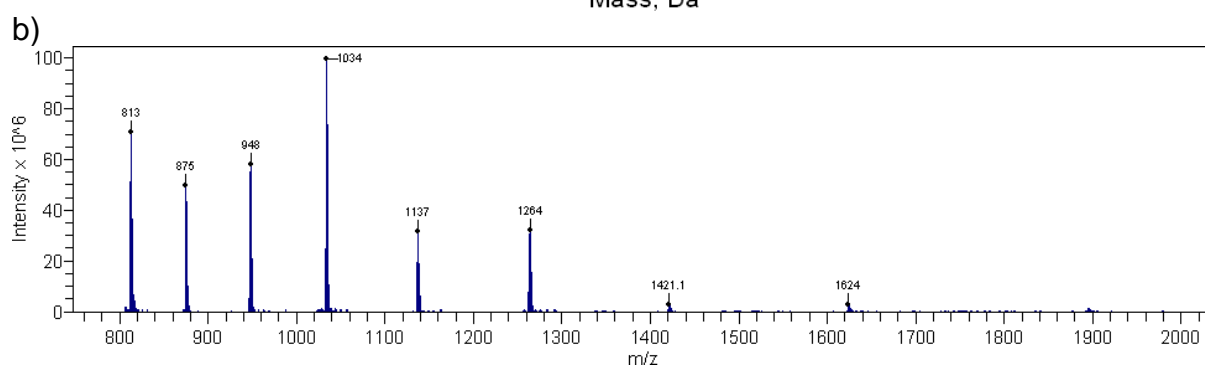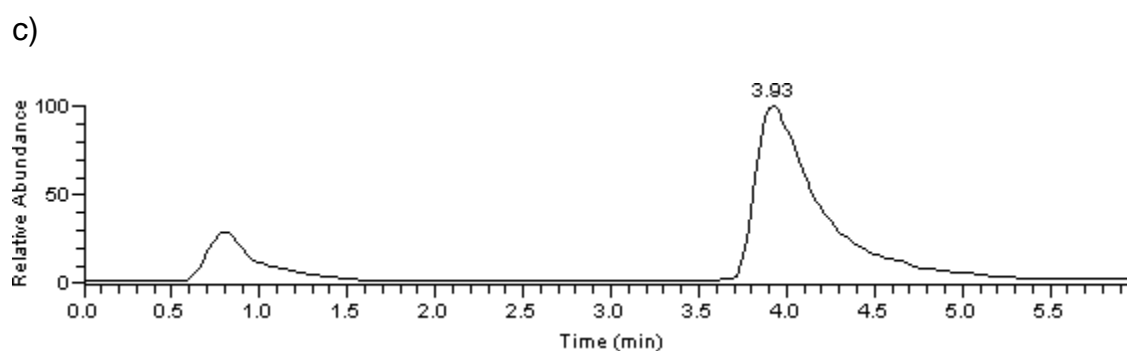

(a) deconvoluted, (b) non-deconvoluted, and (c) TIC mass spectrometry data for Mut4DARPin(N69C, D72CAcEGMe) reacted with NMM to form Mut4DARPin(N69CNMM, D72CAcEGMe).

## Circular Dichroism and Thermal Unfolding

a)

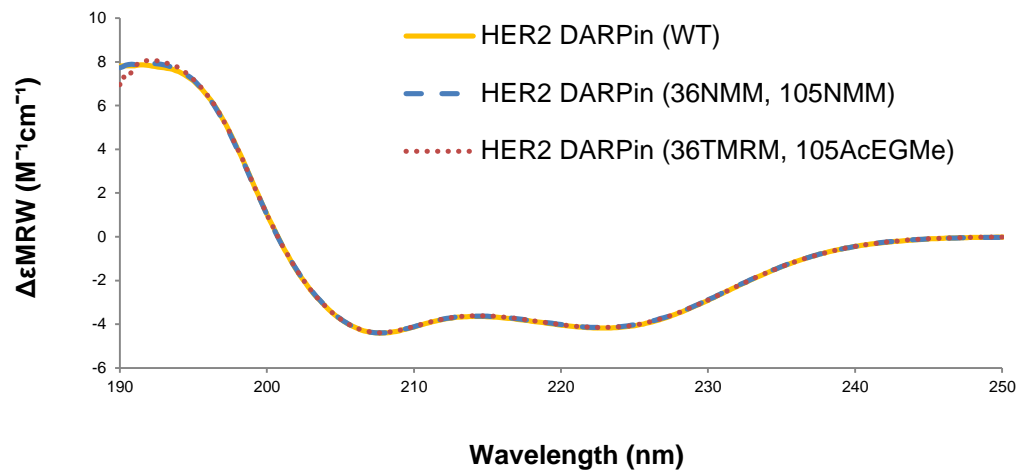

b)

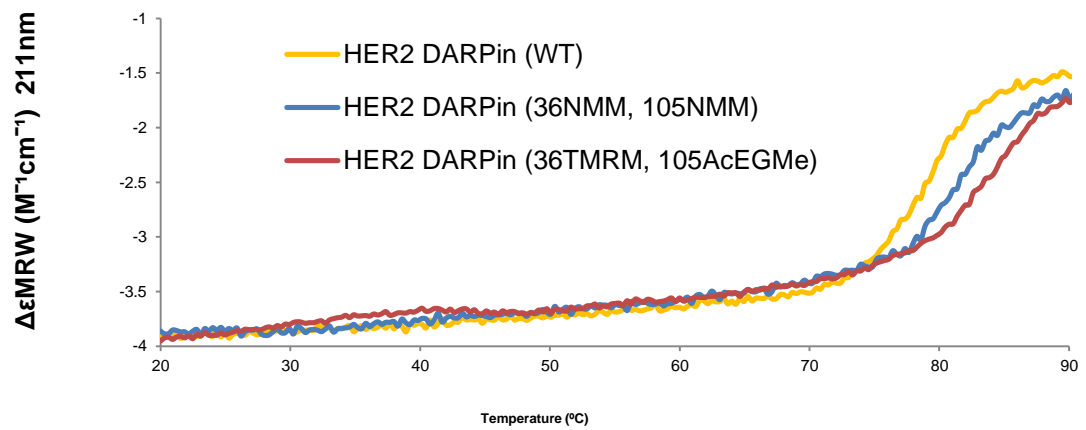

(a) Circular dichroism spectra of HER2DARPin variants, and (b) thermal unfolding of HER2DARPin variants.
